# Supplementary material for: Theoretical studies on the reaction mechanism of alcohol oxidation by high-valent iron-oxo complex of non-heme ligand
Source: Royal Society of Chemistry journal article supplement (doi:10.1039/b917906b), 2010-01-01
Supplement: b917906b.pdf [file b917906b.pdf]

## Supporting information

### Theoretical studies on the reaction mechanism of alcohol oxidation by high-valent iron-oxo complex of nonheme ligand

**Lin Cheng,<sup>1,3</sup> Jinping Wang,<sup>2</sup> Meiyan Wang,<sup>1,3</sup> Zhijian Wu<sup>1,\*</sup>**

<sup>1</sup>State Key Laboratory of Rare Earth Resource Utilization, Changchun  
Institute of Applied Chemistry, Chinese Academy of Sciences, Changchun  
130022, P.R. China

<sup>2</sup>Department of Applied Chemistry, Qingdao Agricultural University, Qingdao 266109,  
P. R. China

<sup>3</sup>Graduate School, Chinese Academy of Sciences, Beijing 100049, P.R. China

**Table S1** Cartesian coordinates all structures considered in this work (B3LYP level)

| <b>0</b>                  |             |             |             | <b>0</b>                  |             |             |             |
|---------------------------|-------------|-------------|-------------|---------------------------|-------------|-------------|-------------|
| Charge=1 Multiplicity = 1 |             |             |             | Charge=1 Multiplicity = 3 |             |             |             |
| Fe                        | 0.11358100  | -0.27048900 | -0.55922000 | Fe                        | -0.05626600 | -0.30321000 | -0.48952900 |
| N                         | 2.08833900  | -0.19855100 | -0.29594100 | N                         | 1.87736300  | -0.12232400 | -0.12894200 |
| N                         | -1.83694800 | -0.28237300 | -0.25561000 | N                         | -2.03227700 | -0.44466400 | -0.27543900 |
| N                         | -0.01069600 | 1.75394200  | -0.45261400 | N                         | -0.17452300 | 1.72693000  | -0.50438000 |
| C                         | 2.50193300  | -0.44694500 | 0.96745400  | C                         | 2.22881300  | -0.14664900 | 1.17530700  |
| C                         | -2.21812000 | -0.37701000 | 1.03747100  | C                         | -2.46310700 | -0.62189000 | 0.99390900  |
| C                         | -0.02810200 | 2.31984900  | 0.76746800  | C                         | -0.25197000 | 2.36397900  | 0.67694500  |
| C                         | 1.40204100  | -0.76601000 | 1.95987200  | C                         | 1.10941300  | -0.47057000 | 2.14245900  |
| H                         | 1.70347200  | -0.52456100 | 2.98669200  | H                         | 1.32332500  | -0.08865700 | 3.14809000  |
| C                         | -1.10546200 | -0.68269200 | 2.01261000  | C                         | -1.37117300 | -0.76212200 | 2.03349100  |
| H                         | -0.96384100 | -1.76679200 | 1.98996100  | H                         | -1.06199800 | -1.80962100 | 2.05087200  |
| H                         | -1.36534600 | -0.38491300 | 3.03553300  | H                         | -1.72714600 | -0.48405800 | 3.03307600  |
| C                         | 0.23765000  | 1.39999200  | 1.93621700  | C                         | -0.38308800 | 1.49585200  | 1.90909400  |
| H                         | -0.45380200 | 1.61455900  | 2.75913000  | H                         | -1.38336400 | 1.64045200  | 2.33278400  |
| N                         | 0.16298900  | -0.04223400 | 1.56127000  | N                         | -0.18764300 | 0.04436000  | 1.62260400  |
| O                         | 0.08351000  | -0.22294200 | -2.18115900 | O                         | -0.02504100 | -0.36031400 | -2.10457700 |
| H                         | 1.19205000  | -1.83595700 | 1.90184600  | H                         | 1.02418400  | -1.55866400 | 2.20386600  |
| C                         | -2.76087500 | -0.15382000 | -1.21938300 | C                         | -2.91534100 | -0.40749800 | -1.28579900 |
| C                         | -3.55722400 | -0.31125000 | 1.40148300  | C                         | -3.81852200 | -0.73925600 | 1.28512900  |
| C                         | -4.11993500 | -0.10687300 | -0.92706700 | C                         | -4.28352100 | -0.53467800 | -1.06651400 |
| H                         | -2.37729100 | -0.10055400 | -2.23188100 | H                         | -2.48663400 | -0.28458300 | -2.27416500 |
| C                         | -4.52433800 | -0.17969600 | 0.40392500  | C                         | -4.74226400 | -0.69816300 | 0.23937500  |
| H                         | -3.83838800 | -0.38516500 | 2.44708900  | H                         | -4.14304200 | -0.87106800 | 2.31253700  |
| H                         | -4.83959600 | -0.01453700 | -1.73299200 | H                         | -4.96803900 | -0.50522200 | -1.90712500 |
| H                         | -5.57731000 | -0.13953300 | 0.66504600  | H                         | -5.80409300 | -0.79416000 | 0.44427200  |
| H                         | -0.15025500 | 1.99402900  | -2.48823300 | H                         | -0.03704700 | 1.85766200  | -2.55070000 |
| C                         | -0.17101000 | 2.52702600  | -1.54420800 | C                         | -0.10234000 | 2.44577400  | -1.64191900 |
| C                         | -0.35453500 | 3.90081500  | -1.45332700 | C                         | -0.10752800 | 3.83452400  | -1.63762800 |
| C                         | -0.38566800 | 4.49349700  | -0.19044900 | C                         | -0.18057600 | 4.50282800  | -0.41460100 |
| H                         | -0.47702300 | 4.48797700  | -2.35692000 | H                         | -0.04991900 | 4.37598800  | -2.57556900 |
| C                         | -0.22095300 | 3.69045000  | 0.93562000  | C                         | -0.25281600 | 3.75622700  | 0.75878900  |
| H                         | -0.53643300 | 5.56335500  | -0.08352800 | H                         | -0.18043400 | 5.58780800  | -0.37472300 |
| H                         | -0.23696100 | 4.11717000  | 1.93389700  | H                         | -0.31202300 | 4.24302300  | 1.72765400  |
| H                         | 4.16558600  | -0.65615600 | 2.31324400  | H                         | 3.81209200  | -0.00030400 | 2.62304400  |
| C                         | 3.85497100  | -0.46546100 | 1.29080000  | C                         | 3.55316100  | 0.01667100  | 1.56906500  |
| C                         | 4.79580100  | -0.24901300 | 0.28252700  | C                         | 4.53254400  | 0.18574200  | 0.58956300  |
| C                         | 4.35606500  | -0.01366500 | -1.01887900 | C                         | 4.15870000  | 0.18406000  | -0.75296300 |
| H                         | 5.85667200  | -0.26573800 | 0.51264800  | H                         | 5.57299000  | 0.31043800  | 0.87350100  |
| C                         | 2.98767000  | 0.00618200  | -1.27052900 | C                         | 2.81608900  | 0.02421700  | -1.07766300 |
| H                         | 5.05528400  | 0.15126200  | -1.83124400 | H                         | 4.89173000  | 0.29550500  | -1.54412700 |
| H                         | 2.57550800  | 0.17280400  | -2.25951000 | H                         | 2.45776300  | -0.01110000 | -2.09866300 |

|   |             |             |             |   |             |             |             |
|---|-------------|-------------|-------------|---|-------------|-------------|-------------|
| H | 1.24401700  | 1.61038800  | 2.31542700  | H | 0.32592600  | 1.82497700  | 2.67730300  |
| C | -0.49097000 | -3.12735100 | -0.39111400 | O | -0.00982100 | -2.14320400 | -0.08230400 |
| O | 0.38818700  | -2.13189200 | -0.37206900 | C | 0.82283800  | -3.00732700 | -0.66543600 |
| O | -1.65489200 | -3.04934900 | -0.02080400 | O | 1.74459800  | -2.70898000 | -1.40381600 |
| C | 0.11622900  | -4.42253600 | -0.90172200 | C | 0.48257400  | -4.44886400 | -0.31808000 |
| H | -0.58208600 | -5.24735900 | -0.75186800 | H | 0.29209300  | -4.56530500 | 0.75345700  |
| H | 0.33818400  | -4.31959000 | -1.96979500 | H | -0.43138200 | -4.74290200 | -0.84649700 |
| H | 1.06321500  | -4.63291600 | -0.39492100 | H | 1.29830800  | -5.10399800 | -0.62761100 |

| <b>0</b>                  |             |             |             | <b>1</b>                  |             |             |             |
|---------------------------|-------------|-------------|-------------|---------------------------|-------------|-------------|-------------|
| Charge=1 Multiplicity = 5 |             |             |             | Charge=1 Multiplicity = 1 |             |             |             |
| Fe                        | 0.09123800  | -0.40386500 | -0.59858800 | Fe                        | 0.13066200  | -0.28394100 | 0.11682700  |
| N                         | 2.24803200  | -0.24337900 | -0.21293200 | N                         | -1.57512300 | 0.39288100  | -0.63454900 |
| N                         | -2.01981500 | -0.23174900 | -0.02766400 | N                         | 2.04887000  | -0.77450900 | 0.36441000  |
| N                         | 0.01595100  | 1.70211800  | -0.66424200 | N                         | 0.45388000  | 1.59118400  | 0.80884500  |
| C                         | 2.58952500  | -0.36806100 | 1.08394800  | C                         | -1.50206100 | 0.81357200  | -1.91977000 |
| C                         | -2.24517800 | -0.22755200 | 1.29817100  | C                         | 2.81460400  | -0.69481900 | -0.74708400 |
| C                         | 0.02767200  | 2.36148800  | 0.50724600  | C                         | 0.94894300  | 2.50004300  | -0.04994100 |
| C                         | 1.43463800  | -0.62364300 | 2.02983000  | C                         | -0.19503000 | 0.52570500  | -2.62607900 |
| H                         | 1.68497800  | -0.33028200 | 3.05759500  | H                         | -0.03937600 | 1.20317300  | -3.47450600 |
| C                         | -1.02703900 | -0.49062800 | 2.15906200  | C                         | 2.07750000  | -0.30820800 | -2.01129700 |
| H                         | -0.88923800 | -1.57474000 | 2.21340500  | H                         | 1.65935500  | -1.21772200 | -2.44823100 |
| H                         | -1.16893000 | -0.11713800 | 3.18128800  | H                         | 2.74870700  | 0.15543300  | -2.74468100 |
| C                         | 0.31504700  | 1.54947100  | 1.75158300  | C                         | 1.39796100  | 1.97910100  | -1.39645800 |
| H                         | -0.34623200 | 1.86467500  | 2.56698600  | H                         | 2.49334700  | 1.99527000  | -1.42422600 |
| N                         | 0.20853600  | 0.07210000  | 1.54705000  | N                         | 0.93741500  | 0.58399900  | -1.66104800 |
| O                         | 0.05423800  | -0.49798300 | -2.20840300 | O                         | -0.36200400 | -0.79102200 | 1.57326100  |
| H                         | 1.21960300  | -1.69591600 | 2.01919900  | H                         | -0.23730700 | -0.49659500 | -3.01085300 |
| C                         | -3.05052300 | -0.15997300 | -0.88137900 | C                         | 2.58774100  | -1.19523700 | 1.52021600  |
| C                         | -3.53016700 | -0.10623000 | 1.82123400  | C                         | 4.16778000  | -1.01707200 | -0.71683000 |
| C                         | -4.36557600 | -0.05104700 | -0.43686000 | C                         | 3.93045100  | -1.54697500 | 1.61743500  |
| H                         | -2.79656900 | -0.20674400 | -1.93467200 | H                         | 1.90324200  | -1.25046200 | 2.35932100  |
| C                         | -4.60612200 | -0.01527800 | 0.93596600  | C                         | 4.73371500  | -1.45297600 | 0.48231100  |
| H                         | -3.68761000 | -0.09830200 | 2.89543800  | H                         | 4.76448900  | -0.93650900 | -1.61998500 |
| H                         | -5.17786800 | -0.00021100 | -1.15366100 | H                         | 4.33008000  | -1.88658400 | 2.56667300  |
| H                         | -5.61917400 | 0.07491100  | 1.31631000  | H                         | 5.78635800  | -1.71503000 | 0.52654300  |
| H                         | -0.17062500 | 1.76936800  | -2.71071400 | H                         | -0.31133000 | 1.18870800  | 2.67434600  |
| C                         | -0.16585700 | 2.37905400  | -1.81296200 | C                         | 0.08890800  | 1.97761500  | 2.04713500  |
| C                         | -0.34229000 | 3.75698700  | -1.83415200 | C                         | 0.21250400  | 3.29396900  | 2.47311700  |
| C                         | -0.34273700 | 4.44923500  | -0.62215900 | C                         | 0.71801900  | 4.24413300  | 1.58510900  |
| H                         | -0.48340200 | 4.27043600  | -2.77893200 | H                         | -0.09100600 | 3.56430000  | 3.47857400  |
| C                         | -0.15691100 | 3.74266800  | 0.56458900  | C                         | 1.09026900  | 3.84081600  | 0.30476400  |
| H                         | -0.48752100 | 5.52514200  | -0.60019300 | H                         | 0.81917000  | 5.28317500  | 1.88329800  |
| H                         | -0.15110200 | 4.25399400  | 1.52249500  | H                         | 1.48781500  | 4.55299100  | -0.41202900 |

|   |             |             |             |   |             |             |             |
|---|-------------|-------------|-------------|---|-------------|-------------|-------------|
| H | 4.17096600  | -0.42603000 | 2.54697600  | H | -2.50928300 | 1.71982800  | -3.58707800 |
| C | 3.91983800  | -0.33263300 | 1.49490600  | C | -2.59626800 | 1.38484200  | -2.55821600 |
| C | 4.91694000  | -0.18693900 | 0.52855500  | C | -3.80075600 | 1.50215600  | -1.86075500 |
| C | 4.55597900  | -0.07472300 | -0.81374800 | C | -3.86862900 | 1.04449900  | -0.54819900 |
| H | 5.96188900  | -0.16143500 | 0.82258500  | H | -4.67033700 | 1.93898800  | -2.34240800 |
| C | 3.20357400  | -0.10484100 | -1.14396800 | C | -2.73193300 | 0.49687800  | 0.04310600  |
| H | 5.30323400  | 0.03427500  | -1.59225300 | H | -4.78714800 | 1.09661200  | 0.02579900  |
| H | 2.85631700  | -0.02554300 | -2.16940500 | H | -2.74880800 | 0.09337500  | 1.05328800  |
| H | 1.33588100  | 1.78031200  | 2.07679900  | H | 1.05958200  | 2.64728600  | -2.19669700 |
| C | -0.56750700 | -3.17691200 | -0.78422200 | C | -2.96986500 | -1.93069600 | 3.56379400  |
| O | 0.12502600  | -2.21433000 | -0.14643900 | O | -3.32493800 | -1.46234600 | 2.27249900  |
| O | -1.54957700 | -2.96149400 | -1.46533000 | H | -3.53564000 | -1.34116200 | 4.29162900  |
| C | 0.00324000  | -4.56114200 | -0.54405100 | H | -3.23439900 | -2.98878900 | 3.70440100  |
| H | -0.66220800 | -5.31398600 | -0.96868800 | H | -2.82729200 | -1.98028800 | 1.61100600  |
| H | 0.98856700  | -4.63732200 | -1.01744000 | O | -0.03943700 | -1.88979000 | -0.86758900 |
| H | 0.14115300  | -4.74396200 | 0.52653100  | C | -1.02641100 | -2.75970500 | -0.72191200 |
|   |             |             |             | O | -1.99940400 | -2.62105500 | 0.00685700  |
|   |             |             |             | C | -0.82837100 | -4.01342300 | -1.55951300 |
|   |             |             |             | H | -0.51711700 | -3.76438200 | -2.57866600 |
|   |             |             |             | H | -0.03464100 | -4.62434500 | -1.11442400 |
|   |             |             |             | H | -1.75211700 | -4.59339200 | -1.58072300 |
|   |             |             |             | H | -1.89699300 | -1.80792600 | 3.77269500  |

|          |                           |             |             |          |                           |             |             |
|----------|---------------------------|-------------|-------------|----------|---------------------------|-------------|-------------|
| <b>1</b> | Charge=1 Multiplicity = 3 |             |             | <b>1</b> | Charge=1 Multiplicity = 5 |             |             |
| Fe       | 0.12502300                | -0.28536700 | 0.12212300  | Fe       | 0.13245800                | -0.28450300 | 0.12343800  |
| N        | -1.56682900               | 0.42419500  | -0.62894500 | N        | -1.57069900               | 0.39146300  | -0.63259400 |
| N        | 2.03452600                | -0.81363000 | 0.36375300  | N        | 2.05218500                | -0.77486600 | 0.36967100  |
| N        | 0.49602200                | 1.58374600  | 0.80678200  | N        | 0.45730700                | 1.59372700  | 0.81038000  |
| C        | -1.48978000               | 0.84046100  | -1.91554200 | C        | -1.49650900               | 0.81449400  | -1.91704600 |
| C        | 2.79920500                | -0.74943600 | -0.74971800 | C        | 2.81785900                | -0.69802700 | -0.74231900 |
| C        | 1.00988000                | 2.47905400  | -0.05552700 | C        | 0.94995200                | 2.50101100  | -0.05195600 |
| C        | -0.19136600               | 0.52451500  | -2.62603900 | C        | -0.19014000               | 0.52441100  | -2.62333000 |
| H        | -0.02503000               | 1.19686600  | -3.47653900 | H        | -0.03383900               | 1.20012700  | -3.47313300 |
| C        | 2.06520800                | -0.35560400 | -2.01344000 | C        | 2.08028700                | -0.31464700 | -2.00738900 |
| H        | 1.62664900                | -1.25882900 | -2.44334700 | H        | 1.65943900                | -1.22503700 | -2.44003700 |
| H        | 2.74325600                | 0.08949700  | -2.75201800 | H        | 2.75160100                | 0.14462700  | -2.74341700 |
| C        | 1.43462800                | 1.94821200  | -1.40658100 | C        | 1.40712200                | 1.97477900  | -1.39399800 |
| H        | 2.52967200                | 1.94566900  | -1.44871800 | H        | 2.50275600                | 1.98452300  | -1.41129000 |
| N        | 0.94524500                | 0.56215200  | -1.66493800 | N        | 0.94264500                | 0.58146200  | -1.65922500 |
| O        | -0.37508300               | -0.77623500 | 1.57833800  | O        | -0.36343100               | -0.78746500 | 1.57735300  |
| H        | -0.25589500               | -0.49742500 | -3.00875400 | H        | -0.23433000               | -0.49853700 | -3.00633900 |
| C        | 2.56863800                | -1.23848200 | 1.52008200  | C        | 2.59079400                | -1.19203200 | 1.52670500  |

|   |             |             |             |   |             |             |             |
|---|-------------|-------------|-------------|---|-------------|-------------|-------------|
| C | 4.14742100  | -1.09184500 | -0.72048800 | C | 4.17114700  | -1.01986400 | -0.71087400 |
| C | 3.90609400  | -1.61022900 | 1.61604100  | C | 3.93352200  | -1.54337100 | 1.62493200  |
| H | 1.88478300  | -1.28002600 | 2.36049500  | H | 1.90613300  | -1.24450100 | 2.36584200  |
| C | 4.70876800  | -1.53192900 | 0.47932800  | C | 4.73697700  | -1.45218100 | 0.48968600  |
| H | 4.74385400  | -1.02316900 | -1.62481000 | H | 4.76805700  | -0.94144100 | -1.61408000 |
| H | 4.30226800  | -1.95248600 | 2.56576400  | H | 4.33313300  | -1.88005000 | 2.57521000  |
| H | 5.75750900  | -1.80930300 | 0.52280700  | H | 5.78976900  | -1.71344500 | 0.53498000  |
| H | -0.27077800 | 1.20288300  | 2.67624800  | H | -0.31135700 | 1.19630000  | 2.67516400  |
| C | 0.14566200  | 1.98083600  | 2.04588300  | C | 0.08620200  | 1.98436000  | 2.04533500  |
| C | 0.30322300  | 3.29426400  | 2.46953000  | C | 0.20109200  | 3.30358200  | 2.46486700  |
| C | 0.82922900  | 4.23039900  | 1.57847800  | C | 0.70397300  | 4.25198100  | 1.57348700  |
| H | 0.01015900  | 3.57337400  | 3.47569100  | H | -0.10719100 | 3.57753000  | 3.46788500  |
| C | 1.18651400  | 3.81619700  | 0.29740200  | C | 1.08260900  | 3.84433400  | 0.29630300  |
| H | 0.95741900  | 5.26696200  | 1.87486200  | H | 0.79809800  | 5.29310300  | 1.86668900  |
| H | 1.59868600  | 4.51733100  | -0.42203300 | H | 1.47828400  | 4.55496200  | -0.42299400 |
| H | -2.48633300 | 1.76236500  | -3.58080100 | H | -2.50217100 | 1.72553000  | -3.58256600 |
| C | -2.57552800 | 1.43084700  | -2.55097600 | C | -2.58980700 | 1.38867700  | -2.55436200 |
| C | -3.77545300 | 1.57102100  | -1.84976700 | C | -3.79426800 | 1.50638000  | -1.85686600 |
| C | -3.84783900 | 1.11643100  | -0.53651200 | C | -3.86322600 | 1.04582100  | -0.54545200 |
| H | -4.63849900 | 2.02258300  | -2.32959000 | H | -4.66312800 | 1.94523700  | -2.33798000 |
| C | -2.71938400 | 0.54932300  | 0.05217900  | C | -2.72753100 | 0.49526200  | 0.04498500  |
| H | -4.76366200 | 1.18486300  | 0.04003600  | H | -4.78191600 | 1.09702000  | 0.02833300  |
| H | -2.74104200 | 0.14582200  | 1.06220800  | H | -2.74642500 | 0.08763600  | 1.05345400  |
| H | 1.09765800  | 2.62219600  | -2.20248300 | H | 1.07957100  | 2.64275900  | -2.19892700 |
| C | -3.02524800 | -1.88952000 | 3.54919100  | C | -2.98161000 | -1.94011200 | 3.54212800  |
| O | -3.38340100 | -1.40604500 | 2.26425400  | O | -3.35113600 | -1.47404200 | 2.25400300  |
| H | -3.57451700 | -1.29558300 | 4.28605300  | H | -3.54718400 | -1.35625800 | 4.27468800  |
| H | -3.30660700 | -2.94394200 | 3.68506300  | H | -3.23528300 | -3.00072700 | 3.68418200  |
| H | -2.89956000 | -1.92827800 | 1.59593600  | H | -2.85198500 | -1.98577700 | 1.58879300  |
| O | -0.08078800 | -1.89141700 | -0.85920800 | O | -0.03529800 | -1.89367200 | -0.85898100 |
| C | -1.09009100 | -2.73658000 | -0.72035500 | C | -1.02841700 | -2.75885600 | -0.72596500 |
| O | -2.06954900 | -2.56955500 | -0.00660500 | O | -2.01481200 | -2.61160700 | -0.01741900 |
| C | -0.90996000 | -4.00021300 | -1.54715600 | C | -0.81883900 | -4.01758500 | -1.55326300 |
| H | -0.57356300 | -3.76610800 | -2.56182200 | H | -0.49126700 | -3.77461000 | -2.56878600 |
| H | -0.14117900 | -4.62923600 | -1.08379900 | H | -0.03297100 | -4.62708200 | -1.09255200 |
| H | -1.84831600 | -4.55558600 | -1.58172500 | H | -1.74315800 | -4.59608200 | -1.58578700 |
| H | -1.94864300 | -1.78647300 | 3.74923200  | H | -1.90832600 | -1.80746100 | 3.74232600  |

|                          |             |             |             |                           |             |             |             |
|--------------------------|-------------|-------------|-------------|---------------------------|-------------|-------------|-------------|
| <b>1-2</b>               |             |             |             | <b>1-2</b>                |             |             |             |
| Charge=1 Multiplicity =1 |             |             |             | Charge=1 Multiplicity = 3 |             |             |             |
| Fe                       | 0.03165200  | -0.21981900 | 0.22495800  | Fe                        | 0.04823000  | -0.22841900 | 0.22095000  |
| N                        | -1.59103200 | 0.82055600  | -0.24864200 | N                         | -1.59959400 | 0.76017200  | -0.28322700 |
| N                        | 1.79854000  | -1.13947100 | 0.19765400  | N                         | 1.84778300  | -1.08838200 | 0.20755100  |

|   |             |             |             |   |             |             |             |
|---|-------------|-------------|-------------|---|-------------|-------------|-------------|
| N | 1.04529900  | 1.47008200  | 0.64338000  | N | 0.96511100  | 1.50443500  | 0.65767400  |
| C | -1.76603800 | 1.01648700  | -1.57604500 | C | -1.74584000 | 0.97507900  | -1.61082100 |
| C | 2.34456000  | -1.26071800 | -1.03171700 | C | 2.40306400  | -1.21548400 | -1.01744800 |
| C | 1.58523700  | 2.13451600  | -0.39469500 | C | 1.48213100  | 2.19983200  | -0.37132100 |
| C | -0.74638800 | 0.33223500  | -2.46182500 | C | -0.69502900 | 0.32176100  | -2.48103200 |
| H | -0.66168200 | 0.82704500  | -3.43732500 | H | -0.59997900 | 0.82736200  | -3.44996500 |
| C | 1.46008800  | -0.81501200 | -2.17812200 | C | 1.51079800  | -0.80623300 | -2.16919400 |
| H | 0.82388000  | -1.66047500 | -2.45091800 | H | 0.88546700  | -1.66498400 | -2.42442200 |
| H | 2.05161600  | -0.53163000 | -3.05718600 | H | 2.09385700  | -0.52572300 | -3.05488000 |
| C | 1.23655400  | 1.62356500  | -1.77437800 | C | 1.27557700  | 1.62531200  | -1.75617900 |
| H | 2.13259500  | 1.57720200  | -2.40373100 | H | 2.24044000  | 1.54274300  | -2.26918700 |
| N | 0.55997000  | 0.29148500  | -1.74407600 | N | 0.59823700  | 0.29226400  | -1.74137800 |
| O | -0.23761100 | -0.45453700 | 1.92608500  | O | -0.22561600 | -0.50794900 | 1.90971300  |
| H | -1.05864800 | -0.70062100 | -2.62997700 | H | -0.98763400 | -0.71446300 | -2.66515800 |
| C | 2.45028100  | -1.61102400 | 1.27094000  | C | 2.51010600  | -1.52152600 | 1.29108200  |
| C | 3.59492200  | -1.84376500 | -1.21396800 | C | 3.66985100  | -1.76597000 | -1.18555800 |
| C | 3.69685000  | -2.22052800 | 1.16049800  | C | 3.77410600  | -2.09651000 | 1.19508500  |
| H | 1.92945700  | -1.48461500 | 2.21416000  | H | 1.98377300  | -1.39419600 | 2.23076500  |
| C | 4.28041300  | -2.33280000 | -0.10050200 | C | 4.36510100  | -2.21569000 | -0.06171300 |
| H | 4.01892200  | -1.92273300 | -2.21016400 | H | 4.09895600  | -1.84989800 | -2.17912900 |
| H | 4.19492300  | -2.59454900 | 2.04838700  | H | 4.27943300  | -2.43922100 | 2.09145200  |
| H | 5.25519400  | -2.79592900 | -0.21932300 | H | 5.35297800  | -2.65309800 | -0.16912500 |
| H | 0.79239800  | 1.31779900  | 2.67218100  | H | 0.65406700  | 1.35668900  | 2.67860500  |
| C | 1.26042300  | 1.91505500  | 1.89695000  | C | 1.09524300  | 1.98308100  | 1.91099000  |
| C | 2.02859000  | 3.04342000  | 2.15642100  | C | 1.75039500  | 3.17824500  | 2.17923900  |
| C | 2.60118700  | 3.72991000  | 1.08531500  | C | 2.29254000  | 3.90255400  | 1.11691800  |
| H | 2.17595900  | 3.36952600  | 3.18028300  | H | 1.83289400  | 3.52847200  | 3.20242400  |
| C | 2.37615400  | 3.26724600  | -0.20922900 | C | 2.15676600  | 3.40454600  | -0.17652700 |
| H | 3.21274600  | 4.61103500  | 1.25396100  | H | 2.81295300  | 4.83924400  | 1.29185400  |
| H | 2.80217700  | 3.77828100  | -1.06738100 | H | 2.56508800  | 3.94173400  | -1.02741100 |
| H | -2.94616800 | 1.90384500  | -3.13800000 | H | -2.90716200 | 1.85929800  | -3.18849200 |
| C | -2.83335300 | 1.75832800  | -2.06821600 | C | -2.81840200 | 1.69917900  | -2.11853700 |
| C | -3.75273400 | 2.29909500  | -1.16710600 | C | -3.77362600 | 2.20204800  | -1.23351600 |
| C | -3.56436800 | 2.09227400  | 0.19702600  | C | -3.61650900 | 1.97361200  | 0.13126600  |
| H | -4.59891600 | 2.87523500  | -1.52865000 | H | -4.62384000 | 2.76425500  | -1.60729500 |
| C | -2.46554200 | 1.35064300  | 0.62065900  | C | -2.51134800 | 1.25162700  | 0.57118700  |
| H | -4.25568500 | 2.49044000  | 0.93144800  | H | -4.33693800 | 2.34028200  | 0.85401900  |
| H | -2.27770800 | 1.14254300  | 1.66533900  | H | -2.35144700 | 1.02672400  | 1.61695600  |
| H | 0.56258700  | 2.34503100  | -2.24943700 | H | 0.67344500  | 2.32519300  | -2.34619700 |
| H | -1.33159800 | -1.02203000 | 2.41840400  | H | -1.24217200 | -1.07188200 | 2.38989800  |
| C | -2.34036000 | -1.53454200 | 2.95895000  | C | -2.27508800 | -1.61212200 | 2.97629200  |
| O | -3.48376500 | -0.97415700 | 2.44477600  | O | -3.42557300 | -1.07975700 | 2.45704300  |
| H | -2.24554600 | -1.29770900 | 4.02153500  | H | -2.17084200 | -1.35331800 | 4.03215800  |
| H | -2.22080100 | -2.60663500 | 2.75078300  | H | -2.12392600 | -2.68050900 | 2.77242500  |

|   |             |             |             |   |             |             |             |
|---|-------------|-------------|-------------|---|-------------|-------------|-------------|
| H | -3.55487300 | -1.30077300 | 1.51809500  | H | -3.48960700 | -1.41879200 | 1.53344500  |
| O | -0.67114700 | -1.86627300 | -0.46546900 | O | -0.60283700 | -1.90142800 | -0.48121600 |
| C | -1.87516000 | -2.37691700 | -0.44888400 | C | -1.78807900 | -2.44844700 | -0.44632100 |
| O | -2.89544300 | -1.81397100 | -0.04181900 | O | -2.81901400 | -1.91877400 | -0.01849400 |
| C | -1.93589400 | -3.79608400 | -0.99403000 | C | -1.81868200 | -3.86672500 | -0.99715300 |
| H | -1.51428600 | -4.48449800 | -0.25226100 | H | -1.38147300 | -4.54846000 | -0.25812600 |
| H | -2.97121900 | -4.07897700 | -1.19041600 | H | -2.84795200 | -4.17207100 | -1.19209000 |
| H | -1.33653100 | -3.89686500 | -1.90377200 | H | -1.21922900 | -3.95165900 | -1.90836600 |

| <b>1-2</b>                |             |             |             | <b>2</b>                  |             |             |             |
|---------------------------|-------------|-------------|-------------|---------------------------|-------------|-------------|-------------|
| Charge=1 Multiplicity = 5 |             |             |             | Charge=1 Multiplicity = 1 |             |             |             |
| Fe                        | 0.13895700  | -0.40388200 | 0.32412600  | Fe                        | -0.15001800 | -0.23789200 | -0.16656700 |
| N                         | -1.80831700 | 0.15778300  | -0.53133500 | N                         | 1.46329500  | 0.71681700  | 0.48085600  |
| N                         | 2.29674700  | -0.40521600 | 0.27088900  | N                         | -1.90286000 | -1.14625400 | -0.33560400 |
| N                         | 0.16102600  | 1.73033200  | 0.88100400  | N                         | -1.06890500 | 1.44697000  | -0.69349800 |
| C                         | -1.78331500 | 0.61461900  | -1.79967400 | C                         | 1.49793100  | 0.91149300  | 1.82252500  |
| C                         | 2.87329000  | -0.19609500 | -0.93031800 | C                         | -2.57448500 | -1.28289100 | 0.82878100  |
| C                         | 0.39820600  | 2.64322100  | -0.07527900 | C                         | -1.70120300 | 2.11934300  | 0.28554800  |
| C                         | -0.46431000 | 0.47398000  | -2.53399100 | C                         | 0.36209900  | 0.26855500  | 2.58769400  |
| H                         | -0.43711900 | 1.13567500  | -3.41092900 | H                         | 0.17245200  | 0.77544900  | 3.54154100  |
| C                         | 1.91980900  | -0.00727600 | -2.09328100 | C                         | -1.80185800 | -0.86104500 | 2.05999100  |
| H                         | 1.61469400  | -0.99798400 | -2.44191400 | H                         | -1.19948000 | -1.71428200 | 2.38319600  |
| H                         | 2.41614800  | 0.51241500  | -2.92456400 | H                         | -2.46942500 | -0.58082400 | 2.88359300  |
| C                         | 0.95972400  | 2.13595700  | -1.38905100 | C                         | -1.52751100 | 1.58212400  | 1.68958900  |
| H                         | 2.04592100  | 2.28168800  | -1.35733400 | H                         | -2.49596800 | 1.52565700  | 2.19908900  |
| N                         | 0.69622500  | 0.69821200  | -1.64404800 | N                         | -0.85428200 | 0.24346800  | 1.72311900  |
| O                         | -0.09590900 | -0.85584200 | 1.93896400  | O                         | 0.35692900  | -0.50678500 | -1.85008900 |
| H                         | -0.39986300 | -0.55785600 | -2.89303800 | H                         | 0.63125800  | -0.76940900 | 2.79680300  |
| C                         | 3.06260100  | -0.65285300 | 1.34624900  | C                         | -2.44165000 | -1.59432500 | -1.48045700 |
| C                         | 4.25785300  | -0.21327100 | -1.08216600 | C                         | -3.84066500 | -1.85745700 | 0.87087100  |
| C                         | 4.45133100  | -0.69809100 | 1.26779400  | C                         | -3.69736900 | -2.19428500 | -1.50845600 |
| H                         | 2.52530900  | -0.81894600 | 2.27413400  | H                         | -1.82464300 | -1.45842400 | -2.36227200 |
| C                         | 5.05705600  | -0.47235000 | 0.03238400  | C                         | -4.40945100 | -2.32175900 | -0.31674700 |
| H                         | 4.70078200  | -0.03244600 | -2.05668700 | H                         | -4.36623700 | -1.94955900 | 1.81615500  |
| H                         | 5.03856400  | -0.90325900 | 2.15624200  | H                         | -4.10348300 | -2.54961100 | -2.44920500 |
| H                         | 6.13838500  | -0.49393700 | -0.06438800 | H                         | -5.39451100 | -2.77814800 | -0.30795700 |
| H                         | -0.42175800 | 1.33837500  | 2.81116900  | H                         | -0.58938100 | 1.29931000  | -2.68317800 |
| C                         | -0.24746100 | 2.13588100  | 2.09722600  | C                         | -1.12708500 | 1.90295500  | -1.95997100 |
| C                         | -0.43656000 | 3.47797000  | 2.40681100  | C                         | -1.82946200 | 3.05537000  | -2.29162100 |
| C                         | -0.20696900 | 4.43018600  | 1.41320200  | C                         | -2.49664000 | 3.75259700  | -1.28385500 |
| H                         | -0.76366000 | 3.76499500  | 3.40034400  | H                         | -1.85241600 | 3.39299700  | -3.32205000 |
| C                         | 0.21499500  | 4.00730900  | 0.15413700  | C                         | -2.43201000 | 3.27681500  | 0.02431900  |
| H                         | -0.35524900 | 5.48696100  | 1.61434200  | H                         | -3.05837300 | 4.65340400  | -1.51141500 |

|   |             |             |             |   |             |             |             |
|---|-------------|-------------|-------------|---|-------------|-------------|-------------|
| H | 0.40498000  | 4.72352400  | -0.63974300 | H | -2.93580800 | 3.79711400  | 0.83341500  |
| H | -2.88322300 | 1.45951000  | -3.44611200 | H | 2.54506100  | 1.74164400  | 3.50497500  |
| C | -2.93239100 | 1.09018000  | -2.42632300 | C | 2.54647500  | 1.58939700  | 2.43012400  |
| C | -4.14157000 | 1.06698800  | -1.72894500 | C | 3.60292400  | 2.04997800  | 1.63846900  |
| C | -4.16419600 | 0.56787900  | -0.42869500 | C | 3.56920300  | 1.82520400  | 0.26613500  |
| H | -5.05105400 | 1.42845900  | -2.19950100 | H | 4.44010100  | 2.56962600  | 2.09428900  |
| C | -2.97152200 | 0.12557200  | 0.13945000  | C | 2.47355500  | 1.16282600  | -0.28244300 |
| H | -5.08481700 | 0.51674600  | 0.14242600  | H | 4.37803200  | 2.13641600  | -0.38404500 |
| H | -2.93711400 | -0.29585700 | 1.13999200  | H | 2.40129000  | 0.95912400  | -1.34457800 |
| H | 0.59107500  | 2.75075700  | -2.22041400 | H | -0.91813100 | 2.29092100  | 2.26088900  |
| H | -0.85766300 | -1.61161700 | 2.90934400  | C | 4.33165800  | -0.37419900 | -2.81021900 |
| C | -1.73579300 | -2.33656400 | 3.26046500  | O | 4.61148600  | -0.74313700 | -1.52734200 |
| O | -2.74069600 | -2.25577000 | 2.32642700  | H | 5.09673400  | 0.25440500  | -3.25519500 |
| H | -2.09382700 | -1.98815800 | 4.23278700  | H | 3.79284400  | -1.07940200 | -3.44126200 |
| H | -1.25066000 | -3.32095500 | 3.31672100  | H | 3.94320300  | -1.40207600 | -1.24245100 |
| H | -2.40149900 | -2.67512900 | 1.49398200  | O | 0.59235000  | -1.86612200 | 0.57322700  |
| O | 0.11081100  | -2.03195600 | -0.75549500 | C | 1.66478400  | -2.46288300 | 0.14667200  |
| C | -0.58141900 | -3.13937500 | -0.62359000 | O | 2.31609800  | -2.10872900 | -0.85262200 |
| O | -1.53893700 | -3.29325100 | 0.13662500  | C | 2.08064600  | -3.69367600 | 0.92877400  |
| C | -0.11284400 | -4.27475600 | -1.51603400 | H | 1.71666600  | -4.58318900 | 0.40109400  |
| H | 0.90651100  | -4.56480300 | -1.23756500 | H | 3.17078200  | -3.75906700 | 0.96650800  |
| H | -0.77608200 | -5.13466800 | -1.41487400 | H | 1.66456000  | -3.69787700 | 1.93841400  |
| H | -0.08269500 | -3.95045300 | -2.56165100 | H | 1.18039000  | -1.04266000 | -1.82944700 |

|          |                           |             |             |          |                           |             |             |
|----------|---------------------------|-------------|-------------|----------|---------------------------|-------------|-------------|
| <b>2</b> | Charge=1 Multiplicity = 3 |             |             | <b>2</b> | Charge=1 Multiplicity = 5 |             |             |
| Fe       | -0.15144600               | -0.23810600 | -0.16774600 | Fe       | 0.19947900                | 0.11493400  | 0.33591000  |
| N        | 1.46194400                | 0.71772000  | 0.47815000  | N        | -0.33383400               | -1.82577700 | -0.48890200 |
| N        | -1.90391900               | -1.14754600 | -0.33560400 | N        | 0.26380900                | 2.27705200  | 0.14503300  |
| N        | -1.07242700               | 1.44598500  | -0.69449600 | N        | -1.79708500               | 0.05446400  | 1.18331600  |
| C        | 1.49700100                | 0.91292200  | 1.81984200  | C        | -1.04167500               | -1.85817100 | -1.63344300 |
| C        | -2.57480500               | -1.28409700 | 0.82920300  | C        | -0.15942700               | 2.82043800  | -1.01425600 |
| C        | -1.70444200               | 2.11808500  | 0.28492100  | C        | -2.83967700               | 0.24178800  | 0.35436000  |
| C        | 0.36228400                | 0.26904400  | 2.58587700  | C        | -1.11383100               | -0.55055100 | -2.40051700 |
| H        | 0.17307300                | 0.77569100  | 3.53993800  | H        | -1.95609100               | -0.56631500 | -3.10768700 |
| C        | -1.80174000               | -0.86142000 | 2.05988000  | C        | -0.56765000               | 1.83670400  | -2.09653100 |
| H        | -1.19890700               | -1.71429400 | 2.38322100  | H        | 0.33428500                | 1.52527600  | -2.63268000 |
| H        | -2.46904700               | -0.58114600 | 2.88366800  | H        | -1.23427000               | 2.32328300  | -2.82375200 |
| C        | -1.52830500               | 1.58183600  | 1.68899800  | C        | -2.53610800               | 0.89121800  | -0.98515300 |
| H        | -2.49582000               | 1.52562700  | 2.20031600  | H        | -2.63031600               | 1.97456700  | -0.84734500 |
| N        | -0.85475500               | 0.24333900  | 1.72224100  | N        | -1.17276300               | 0.62362300  | -1.50558500 |
| O        | 0.35430800                | -0.50637100 | -1.85177200 | O        | 1.15994000                | -0.39627800 | 1.87264900  |
| H        | 0.63224600                | -0.76878200 | 2.79460400  | H        | -0.19494400               | -0.46537700 | -2.98993000 |
| C        | -2.44301800               | -1.59641500 | -1.47998600 | C        | 0.68482900                | 3.09252300  | 1.12698600  |



|   |             |             |             |   |             |             |             |
|---|-------------|-------------|-------------|---|-------------|-------------|-------------|
| C | -3.84064300 | -1.85934900 | 0.87220100  | C | -0.17811200 | 4.19890400  | -1.21808800 |
| C | -3.69841000 | -2.19710400 | -1.50707200 | C | 0.71145400  | 4.47755900  | 0.99612000  |
| H | -1.82652900 | -1.46052500 | -2.36216900 | H | 1.00260400  | 2.60092300  | 2.04198900  |
| C | -4.40979200 | -2.32446300 | -0.31492900 | C | 0.27056300  | 5.04157800  | -0.20050800 |
| H | -4.36566300 | -1.95136900 | 1.81779900  | H | -0.53675800 | 4.60386000  | -2.15975600 |
| H | -4.10481800 | -2.55307300 | -2.44745100 | H | 1.06178500  | 5.09447100  | 1.81677900  |
| H | -5.39458900 | -2.78140400 | -0.30542500 | H | 0.26757900  | 6.11859300  | -0.33824900 |
| H | -0.59503200 | 1.29783800  | -2.68463700 | H | -1.13467900 | -0.56095700 | 3.03023900  |
| C | -1.13255700 | 1.90127100  | -1.96112300 | C | -2.02350300 | -0.42088400 | 2.42153500  |
| C | -1.83661300 | 3.05273000  | -2.29254700 | C | -3.30123200 | -0.72068400 | 2.88440900  |
| C | -2.50348400 | 3.74966800  | -1.28437900 | C | -4.38339800 | -0.53886800 | 2.02316700  |
| H | -1.86110000 | 3.38982600  | -3.32311400 | H | -3.43959800 | -1.09561700 | 3.89306800  |
| C | -2.43688600 | 3.27457700  | 0.02394900  | C | -4.14776400 | -0.05408400 | 0.73671000  |
| H | -3.06650900 | 4.64971600  | -1.51175300 | H | -5.39402500 | -0.77225700 | 2.34469300  |
| H | -2.94040000 | 3.79466900  | 0.83335300  | H | -4.96744700 | 0.09966300  | 0.04077300  |
| H | 2.54364200  | 1.74493500  | 3.50158300  | H | -2.17667600 | -3.02841800 | -3.04200800 |
| C | 2.54488800  | 1.59233900  | 2.42678100  | C | -1.60377500 | -3.03778000 | -2.11944300 |
| C | 3.60050100  | 2.05405300  | 1.63462300  | C | -1.41474200 | -4.22127600 | -1.40544600 |
| C | 3.56670700  | 1.82849700  | 0.26247200  | C | -0.67682700 | -4.18511700 | -0.22210700 |
| H | 4.43717700  | 2.57491200  | 2.08996400  | H | -1.84140400 | -5.15302500 | -1.76456900 |
| C | 2.47177500  | 1.16436800  | -0.28542300 | C | -0.16110600 | -2.96447400 | 0.20371000  |
| H | 4.37499200  | 2.14019000  | -0.38810800 | H | -0.51096500 | -5.08139600 | 0.36645400  |
| H | 2.39942500  | 0.96009400  | -1.34730200 | H | 0.40579500  | -2.86297600 | 1.12482400  |
| H | -0.91791600 | 2.29107900  | 2.25866300  | H | -3.29690500 | 0.60561100  | -1.72497500 |
| C | 4.36586300  | -0.37613100 | -2.79732200 | C | 4.32532600  | -1.96832300 | 2.31671600  |
| O | 4.61905000  | -0.74006500 | -1.50724000 | O | 5.11682300  | -1.49450000 | 1.51881100  |
| H | 5.14244500  | 0.24662600  | -3.23041600 | H | 4.65802000  | -2.71696000 | 3.05595400  |
| H | 3.83624100  | -1.08212800 | -3.43520800 | H | 3.25937100  | -1.67477000 | 2.32908600  |
| H | 3.94498500  | -1.39754700 | -1.23285000 | H | 4.34359400  | -0.26417600 | 0.52079700  |
| O | 0.59259300  | -1.86546100 | 0.57153700  | O | 1.90876200  | 0.02681800  | -1.26115100 |
| C | 1.66550100  | -2.46089700 | 0.14413700  | C | 3.06462700  | -0.22942600 | -0.93866600 |
| O | 2.31610100  | -2.10533700 | -0.85512600 | O | 3.54452400  | 0.23937100  | 0.21194200  |
| C | 2.08274100  | -3.69179000 | 0.92529200  | C | 4.00706400  | -1.02590200 | -1.80721100 |
| H | 1.71826200  | -4.58123300 | 0.39783000  | H | 3.46182500  | -1.47244700 | -2.63872300 |
| H | 3.17293500  | -3.75688400 | 0.96161400  | H | 4.78798300  | -0.36432900 | -2.20037600 |
| H | 1.66792000  | -3.69641100 | 1.93545300  | H | 4.50708100  | -1.80819400 | -1.22625600 |
| H | 1.17886900  | -1.04060300 | -1.83176700 | H | 1.98620100  | 0.09283500  | 1.98891500  |

|          |                           |             |             |          |                           |             |             |
|----------|---------------------------|-------------|-------------|----------|---------------------------|-------------|-------------|
| <b>3</b> | Charge=1 Multiplicity = 1 |             |             | <b>3</b> | Charge=1 Multiplicity = 3 |             |             |
| Fe       | -0.15467900               | -0.19977900 | 0.08792500  | Fe       | -0.18942100               | 0.21110100  | 0.21259500  |
| N        | -2.08251200               | 0.31506900  | 0.07469900  | N        | 1.72928500                | 0.66129500  | 0.02449900  |
| N        | 1.71614900                | -0.69378800 | -0.31739700 | N        | -2.09267600               | -0.28449100 | -0.09099200 |

|   |             |             |             |   |             |             |             |
|---|-------------|-------------|-------------|---|-------------|-------------|-------------|
| N | 0.51895900  | 1.63927500  | 0.36063200  | N | 0.45620400  | -1.89414600 | 0.42533800  |
| C | -2.60648500 | 0.33800200  | -1.17697900 | C | 2.18982500  | 0.62801200  | -1.25053900 |
| C | 1.98853600  | -0.68866100 | -1.64346200 | C | -2.44415000 | -0.27364400 | -1.40557200 |
| C | 0.58744200  | 2.38118400  | -0.76864600 | C | 0.76907600  | -2.44084300 | -0.76174100 |
| C | -1.64754100 | -0.06568800 | -2.27347300 | C | 1.12278700  | 0.49645300  | -2.31639400 |
| H | -1.91503000 | 0.38926300  | -3.23577800 | H | 1.53181500  | 0.06816800  | -3.24025800 |
| C | 0.78415200  | -0.50861400 | -2.54040400 | C | -1.34926900 | 0.14236400  | -2.36422700 |
| H | 0.35287900  | -1.49582400 | -2.72560600 | H | -1.32990900 | 1.23240200  | -2.42985700 |
| H | 1.06179600  | -0.07307300 | -3.50827400 | H | -1.52656000 | -0.26349500 | -3.36885400 |
| C | -0.05474600 | 1.77544400  | -1.99327100 | C | 0.15632300  | -1.76512500 | -1.97400900 |
| H | 0.53134200  | 1.99709800  | -2.89285400 | H | -0.83450600 | -2.20645900 | -2.12804100 |
| N | -0.26384900 | 0.29984900  | -1.85160800 | N | -0.03404700 | -0.29331500 | -1.81070600 |
| O | -0.00992800 | -0.85158500 | 2.00903300  | O | -0.14979800 | 0.97329100  | 1.99612000  |
| H | -1.67996800 | -1.15173700 | -2.37633100 | H | 0.75352800  | 1.49975500  | -2.54664200 |
| C | 2.71904700  | -0.92197000 | 0.54915000  | C | -3.01791400 | -0.66824300 | 0.81229500  |
| C | 3.27163200  | -0.90998300 | -2.13359000 | C | -3.72302200 | -0.61163400 | -1.83313700 |
| C | 4.02361000  | -1.16825500 | 0.13212000  | C | -4.32050900 | -1.00474300 | 0.45421800  |
| H | 2.44252800  | -0.89573500 | 1.59670300  | H | -2.67258600 | -0.73289800 | 1.83867200  |
| C | 4.30710000  | -1.16064800 | -1.23225700 | C | -4.68679000 | -0.96726100 | -0.88840900 |
| H | 3.45519300  | -0.89166400 | -3.20348200 | H | -3.95845700 | -0.59737900 | -2.89286100 |
| H | 4.79842000  | -1.35472000 | 0.86802700  | H | -5.02636500 | -1.30074600 | 1.22297600  |
| H | 5.31568100  | -1.34137300 | -1.59096200 | H | -5.69376600 | -1.22709000 | -1.19992800 |
| H | 1.06319500  | 1.50762000  | 2.36038300  | H | 0.56595100  | -2.01699600 | 2.47773000  |
| C | 1.06626100  | 2.14746700  | 1.48644000  | C | 0.86297600  | -2.50178600 | 1.55213800  |
| C | 1.64923500  | 3.40909300  | 1.53506300  | C | 1.60454300  | -3.68162800 | 1.53406500  |
| C | 1.69976600  | 4.17855700  | 0.37444100  | C | 1.94664700  | -4.23937400 | 0.30308300  |
| H | 2.06602100  | 3.76725800  | 2.47030000  | H | 1.90954200  | -4.14504800 | 2.46647500  |
| C | 1.16864900  | 3.64588000  | -0.79864800 | C | 1.52129600  | -3.60895000 | -0.86722800 |
| H | 2.15354100  | 5.16471300  | 0.37692000  | H | 2.53381300  | -5.15139900 | 0.25151000  |
| H | 1.20399200  | 4.20249600  | -1.73042600 | H | 1.76353800  | -4.02032800 | -1.84275300 |
| H | -4.31190200 | 0.68313900  | -2.43742800 | H | 3.87466600  | 0.74932500  | -2.58066800 |
| C | -3.93610200 | 0.66638200  | -1.41900600 | C | 3.53902500  | 0.78839400  | -1.54889700 |
| C | -4.77116600 | 0.96345000  | -0.34131400 | C | 4.44363700  | 1.00522700  | -0.50823400 |
| C | -4.23771200 | 0.93274900  | 0.94490100  | C | 3.96546600  | 1.04878900  | 0.80023800  |
| H | -5.81369500 | 1.21735500  | -0.50581800 | H | 5.50080200  | 1.13579100  | -0.71818800 |
| C | -2.89373600 | 0.60960300  | 1.10579600  | C | 2.60534300  | 0.86440800  | 1.02651100  |
| H | -4.84519000 | 1.15750900  | 1.81493200  | H | 4.63220500  | 1.21624900  | 1.63936800  |
| H | -2.44218000 | 0.57983300  | 2.08928100  | H | 2.16526600  | 0.88426100  | 2.01722800  |
| H | -1.03537900 | 2.24231000  | -2.13623700 | H | 0.74054800  | -1.97438900 | -2.87845500 |
| H | -0.10523800 | -1.90108700 | 1.88186100  | H | -0.01021600 | 2.46359000  | 1.64026400  |
| C | -0.20862700 | -0.44375500 | 3.34232500  | C | -1.02377600 | 0.83231800  | 3.04652400  |
| O | 0.99520300  | -0.09771800 | 3.98325100  | O | -1.13733500 | -0.56459800 | 3.36562700  |
| H | -0.73343400 | -1.24431700 | 3.88007500  | H | -2.03152100 | 1.22494800  | 2.80906600  |
| H | -0.81047500 | 0.46891900  | 3.36359300  | H | -0.64164400 | 1.37358600  | 3.92787200  |

|   |             |             |             |   |             |             |             |
|---|-------------|-------------|-------------|---|-------------|-------------|-------------|
| O | -0.72327800 | -2.04171000 | -0.44095100 | O | -0.57495500 | 2.42088100  | -0.62178200 |
| C | -0.67497600 | -3.13259000 | 0.23125400  | C | -0.34728100 | 3.45041600  | 0.03271000  |
| O | -0.31776400 | -3.21723400 | 1.43695200  | O | 0.00067200  | 3.43832200  | 1.29683000  |
| C | -1.11235800 | -4.39369900 | -0.48520800 | C | -0.45742100 | 4.83001800  | -0.56092600 |
| H | -2.20594600 | -4.40224900 | -0.56422000 | H | 0.46009900  | 5.39445800  | -0.36854900 |
| H | -0.70837900 | -4.42224400 | -1.50119600 | H | -0.64810500 | 4.77176400  | -1.63296300 |
| H | -0.79624900 | -5.27724900 | 0.07121600  | H | -1.27524700 | 5.37073900  | -0.07226300 |
| H | 1.47315900  | -0.91252800 | 4.20732400  | H | -1.51885900 | -0.64500200 | 4.25548500  |

| <b>3-4</b>                |             |             |             | <b>3-4</b>                |             |             |             |
|---------------------------|-------------|-------------|-------------|---------------------------|-------------|-------------|-------------|
| Charge=1 Multiplicity = 1 |             |             |             | Charge=1 Multiplicity = 3 |             |             |             |
| Fe                        | -0.04593000 | -0.27216200 | 0.11569400  | Fe                        | 0.23080200  | 0.15885300  | 0.16475800  |
| N                         | -1.94347300 | 0.32046900  | 0.07260400  | N                         | 1.87721100  | -0.95543400 | 0.05875100  |
| N                         | 1.86779600  | -0.68579300 | -0.25773200 | N                         | -1.39843100 | 1.25383500  | -0.20725000 |
| N                         | 0.52371200  | 1.58281400  | 0.51068400  | N                         | -1.27340000 | -1.44507800 | 0.47681700  |
| C                         | -2.40742400 | 0.53094800  | -1.18453300 | C                         | 2.24792400  | -1.24806300 | -1.21715400 |
| C                         | 2.14269900  | -0.72936400 | -1.58554500 | C                         | -1.72248300 | 1.29750900  | -1.52486600 |
| C                         | 0.56838500  | 2.39576500  | -0.56784300 | C                         | -1.63554300 | -2.00458800 | -0.69092900 |
| C                         | -1.45520500 | 0.10294500  | -2.27882000 | C                         | 1.41033600  | -0.60130300 | -2.29743900 |
| H                         | -1.65674300 | 0.62910900  | -3.22019900 | H                         | 1.45647800  | -1.16971500 | -3.23536000 |
| C                         | 0.93211300  | -0.58945400 | -2.48208100 | C                         | -0.72396000 | 0.66728900  | -2.47093700 |
| H                         | 0.45325100  | -1.56460900 | -2.59660000 | H                         | 0.01508800  | 1.42706400  | -2.74222500 |
| H                         | 1.20791400  | -0.22441300 | -3.47942200 | H                         | -1.21306400 | 0.33372700  | -3.39506200 |
| C                         | 0.34545500  | 1.75087100  | -1.91805600 | C                         | -0.70512900 | -1.75682600 | -1.86326900 |
| H                         | 1.27397500  | 1.82018800  | -2.49579200 | H                         | -1.24316600 | -1.85029400 | -2.81467000 |
| N                         | -0.05460900 | 0.31146700  | -1.81286700 | N                         | 0.01216200  | -0.44538600 | -1.80858000 |
| H                         | -1.58253800 | -0.96740600 | -2.46020700 | H                         | 1.80633200  | 0.39973600  | -2.48655200 |
| C                         | 2.88966100  | -0.76274000 | 0.61982300  | C                         | -2.24460800 | 1.82416200  | 0.67381700  |
| C                         | 3.43510500  | -0.89369800 | -2.06990200 | C                         | -2.87200000 | 1.93173000  | -1.98496500 |
| C                         | 4.20780100  | -0.93815900 | 0.20216600  | C                         | -3.40165700 | 2.49080200  | 0.28431700  |
| H                         | 2.62987500  | -0.66148200 | 1.67562100  | H                         | -1.99992500 | 1.71320800  | 1.72324800  |
| C                         | 4.48717200  | -1.01580900 | -1.15952500 | C                         | -3.72149900 | 2.55269900  | -1.06962800 |
| H                         | 3.61512200  | -0.92119200 | -3.14022100 | H                         | -3.09637500 | 1.93859200  | -3.04716200 |
| H                         | 4.99585900  | -1.00452300 | 0.94466600  | H                         | -4.03948200 | 2.93784100  | 1.03906300  |
| H                         | 5.50512800  | -1.15075700 | -1.51224200 | H                         | -4.62006100 | 3.05935300  | -1.40776500 |
| H                         | 0.89287400  | 1.41414900  | 2.54490700  | H                         | -1.75070100 | -1.11302500 | 2.47046600  |
| C                         | 0.84754100  | 2.10604900  | 1.71337100  | C                         | -2.03282300 | -1.65920300 | 1.56856400  |
| C                         | 1.16648100  | 3.44717600  | 1.88894200  | C                         | -3.15663900 | -2.48388400 | 1.53561500  |
| C                         | 1.16256700  | 4.29398100  | 0.78214600  | C                         | -3.52309100 | -3.07729200 | 0.32950100  |
| H                         | 1.41829200  | 3.80934800  | 2.87978400  | H                         | -3.73601800 | -2.63837000 | 2.43973700  |
| C                         | 0.87012700  | 3.75205600  | -0.46698200 | C                         | -2.75674000 | -2.82276600 | -0.80897100 |
| H                         | 1.39900400  | 5.34852600  | 0.88457900  | H                         | -4.39889000 | -3.71641100 | 0.26829500  |
| H                         | 0.88582800  | 4.36984100  | -1.36014100 | H                         | -3.02412500 | -3.25311100 | -1.76968200 |
| H                         | -4.00611200 | 1.21643500  | -2.44826500 | H                         | 3.60716700  | -2.25347600 | -2.54027600 |

|   |             |             |             |   |             |             |             |
|---|-------------|-------------|-------------|---|-------------|-------------|-------------|
| C | -3.67228600 | 1.05506900  | -1.42788300 | C | 3.35750900  | -2.03423400 | -1.50678500 |
| C | -4.49757500 | 1.36473800  | -0.34520600 | C | 4.14023300  | -2.52367700 | -0.46038700 |
| C | -4.02109500 | 1.14811700  | 0.94627900  | C | 3.77570900  | -2.20892700 | 0.84608500  |
| H | -5.49028500 | 1.77194000  | -0.51000300 | H | 5.01262100  | -3.13665800 | -0.66397300 |
| C | -2.73928900 | 0.63234300  | 1.11248100  | C | 2.64218500  | -1.43152000 | 1.06103200  |
| H | -4.62562800 | 1.37715100  | 1.81724400  | H | 4.35158900  | -2.56082100 | 1.69514700  |
| H | -2.32274800 | 0.44644300  | 2.09639200  | H | 2.32980600  | -1.17247600 | 2.06367900  |
| H | -0.41051800 | 2.30631600  | -2.48367200 | H | 0.06026900  | -2.54054900 | -1.85413900 |
| H | -1.43473400 | -1.96568100 | 1.68501600  | H | 1.67275900  | 1.94744100  | 1.74729800  |
| O | -0.62627500 | -2.12336700 | -0.49290700 | O | 1.52714700  | 1.90167000  | -0.58921400 |
| C | -1.40012800 | -2.93498100 | 0.05419800  | C | 2.23592400  | 2.67644900  | 0.07226600  |
| O | -1.89420600 | -2.76794100 | 1.25472000  | O | 2.30433600  | 2.65344100  | 1.38412400  |
| C | -1.82533500 | -4.20338200 | -0.62520200 | C | 3.09108600  | 3.73927400  | -0.56085500 |
| H | -2.90721300 | -4.33452700 | -0.53112500 | H | 2.72133700  | 4.72651600  | -0.26315800 |
| H | -1.52991100 | -4.19905100 | -1.67468600 | H | 4.11882500  | 3.65824900  | -0.19407700 |
| H | -1.35304300 | -5.05376100 | -0.12015300 | H | 3.06899500  | 3.65197300  | -1.64733400 |
| O | -0.26167900 | -0.94341500 | 2.00066400  | O | -0.81594300 | 0.44400100  | 3.66001900  |
| C | 0.78090700  | -1.81140900 | 2.72152800  | H | -0.41520700 | 1.17902100  | 2.60048500  |
| O | 1.37612100  | -0.80508800 | 3.39049900  | C | 0.38661200  | -0.03433300 | 3.30765300  |
| H | 0.20576300  | -2.53327300 | 3.32676100  | O | 0.52978800  | 0.82006100  | 2.01952200  |
| H | 1.37513400  | -2.34678800 | 1.96135900  | H | 1.24552300  | 0.23187400  | 3.94717400  |
| H | 0.24391700  | -0.29633900 | 2.81959600  | H | 0.43588600  | -1.09863400 | 3.01337700  |

|          |                          |             |             |          |                          |             |             |
|----------|--------------------------|-------------|-------------|----------|--------------------------|-------------|-------------|
| <b>4</b> | Charge=1 Multiplicity =1 |             |             | <b>4</b> | Charge=1 Multiplicity =3 |             |             |
| Fe       | 0.01781900               | 0.13813300  | 0.03063800  | Fe       | 0.02383800               | 0.24642500  | -0.05407000 |
| N        | 1.72952500               | -0.79255100 | -0.38346800 | N        | 1.77163500               | -0.41199500 | -0.71201000 |
| N        | -1.79145000              | 0.92983800  | 0.07233000  | N        | -1.89696100              | 0.65364200  | 0.20707300  |
| N        | -0.72246400              | -1.46071100 | 0.88224000  | N        | -0.27577700              | -1.52881600 | 0.98622700  |
| C        | 1.80753200               | -1.17572600 | -1.68322400 | C        | 1.71293300               | -0.98732000 | -1.94076400 |
| C        | -2.45751700              | 0.78821700  | -1.09901500 | C        | -2.68801700              | 0.23852700  | -0.81392800 |
| C        | -1.28049200              | -2.35518500 | 0.03770900  | C        | -0.76014400              | -2.57525100 | 0.29467900  |
| C        | 0.64401900               | -0.73556900 | -2.54196600 | C        | 0.37357000               | -0.91196200 | -2.65296000 |
| H        | 0.51757200               | -1.38481900 | -3.41780600 | H        | 0.31953000               | -1.66875500 | -3.44813300 |
| C        | -1.62491400              | 0.23464400  | -2.23349500 | C        | -1.97761100              | -0.29860200 | -2.04625900 |
| H        | -1.09714600              | 1.06837500  | -2.70351900 | H        | -1.68212900              | 0.55864700  | -2.65824000 |
| H        | -2.24773600              | -0.24932700 | -2.99625700 | H        | -2.66503000              | -0.91447500 | -2.64305400 |
| C        | -1.11538700              | -2.06689500 | -1.43869100 | C        | -0.96697900              | -2.40248700 | -1.20573900 |
| H        | -2.06551200              | -2.21074300 | -1.96571400 | H        | -1.98110700              | -2.73219300 | -1.46571400 |
| N        | -0.58440700              | -0.68933900 | -1.69704000 | N        | -0.74247300              | -1.02771200 | -1.69033400 |
| O        | 0.49752000               | 1.00987100  | 1.78503100  | O        | 0.55107400               | 1.39609800  | 1.73944600  |
| H        | 0.83614200               | 0.28329300  | -2.88509100 | H        | 0.30121600               | 0.07464400  | -3.11925300 |
| C        | -2.43234300              | 1.48377700  | 1.11751600  | C        | -2.47161000              | 1.21162200  | 1.28873000  |
| C        | -3.77991500              | 1.19169100  | -1.24948500 | C        | -4.07284200              | 0.36817300  | -0.76339600 |

|   |             |             |             |   |             |             |             |
|---|-------------|-------------|-------------|---|-------------|-------------|-------------|
| C | -3.74910700 | 1.92718300  | 1.03602000  | C | -3.84758100 | 1.38627000  | 1.39778300  |
| H | -1.85464000 | 1.56751400  | 2.03122500  | H | -1.78934800 | 1.52097800  | 2.07196300  |
| C | -4.43739000 | 1.77673000  | -0.16607800 | C | -4.66481800 | 0.95490700  | 0.35549300  |
| H | -4.28443300 | 1.05535600  | -2.20111300 | H | -4.67796500 | 0.01823100  | -1.59417700 |
| H | -4.22002000 | 2.37590000  | 1.90404300  | H | -4.26173500 | 1.84903400  | 2.28706000  |
| H | -5.46790800 | 2.10472700  | -0.26102700 | H | -5.74313000 | 1.06889000  | 0.41039200  |
| H | -0.37062600 | -0.92438600 | 2.84199200  | H | 0.28878400  | -0.77241700 | 2.82025400  |
| C | -0.80926800 | -1.68769600 | 2.20978600  | C | -0.07711400 | -1.65919700 | 2.31386600  |
| C | -1.43400400 | -2.81115700 | 2.73724500  | C | -0.33817500 | -2.84000100 | 2.99660600  |
| C | -2.00884100 | -3.73561200 | 1.86510500  | C | -0.83625200 | -3.93027900 | 2.28130400  |
| H | -1.47288500 | -2.94958700 | 3.81245100  | H | -0.16024400 | -2.89823100 | 4.06506000  |
| C | -1.93289100 | -3.49799200 | 0.49401000  | C | -1.05292100 | -3.79182300 | 0.91328200  |
| H | -2.51011000 | -4.62103100 | 2.24346100  | H | -1.05673700 | -4.86870600 | 2.78090400  |
| H | -2.37328200 | -4.19117400 | -0.21667600 | H | -1.44629400 | -4.61645400 | 0.32551300  |
| H | 2.91312300  | -2.17871700 | -3.22861600 | H | 2.74667500  | -2.01629800 | -3.51683000 |
| C | 2.89483200  | -1.88342500 | -2.18398700 | C | 2.83395600  | -1.55597000 | -2.53742300 |
| C | 3.95244600  | -2.19997500 | -1.32999600 | C | 4.05897600  | -1.51932900 | -1.87029800 |
| C | 3.87432700  | -1.80664500 | 0.00367600  | C | 4.11848100  | -0.91737300 | -0.61601300 |
| H | 4.81379600  | -2.74759200 | -1.69971400 | H | 4.94516200  | -1.95412900 | -2.32223100 |
| C | 2.74761700  | -1.11255400 | 0.43578700  | C | 2.95530700  | -0.38097200 | -0.07202400 |
| H | 4.66782200  | -2.03241500 | 0.70790500  | H | 5.04675900  | -0.86232700 | -0.05762600 |
| H | 2.65783600  | -0.79398700 | 1.46726000  | H | 2.96487500  | 0.09600600  | 0.90099300  |
| H | -0.41417500 | -2.79450500 | -1.86199300 | H | -0.28432000 | -3.08340700 | -1.72868600 |
| C | 3.42046300  | 2.45288000  | 2.62374300  | C | 3.61234200  | 2.69538000  | 3.28358200  |
| O | 3.11389500  | 1.28298000  | 2.76944900  | O | 3.23026000  | 1.70895800  | 2.68661000  |
| H | 2.75413900  | 3.17003600  | 2.11438000  | H | 2.92559400  | 3.51367700  | 3.56363000  |
| H | 4.38812200  | 2.83258700  | 2.99683900  | H | 4.67079100  | 2.81532900  | 3.57387400  |
| H | 0.53399100  | 1.98394800  | 1.46323600  | H | 0.33135100  | 2.28475100  | 1.29651800  |
| O | 0.66666400  | 1.71483600  | -1.00015900 | O | 0.18474700  | 1.81111300  | -1.26587400 |
| C | 0.89757500  | 2.90024200  | -0.56299600 | C | 0.04741200  | 3.04778600  | -0.91359600 |
| O | 0.81500900  | 3.25409300  | 0.64164600  | O | -0.00732800 | 3.45173200  | 0.26791200  |
| C | 1.31950500  | 3.92193500  | -1.60276800 | C | -0.02737600 | 4.04880800  | -2.05183600 |
| H | 0.63462600  | 3.90350000  | -2.45618500 | H | -0.85956500 | 3.79931800  | -2.71905500 |
| H | 1.34533300  | 4.92272100  | -1.16931300 | H | -0.15775400 | 5.06028700  | -1.66493100 |
| H | 2.31632000  | 3.66859800  | -1.98216600 | H | 0.89013000  | 3.99939100  | -2.64819900 |
| H | 1.39574400  | 0.89216000  | 2.16625500  | H | 1.46049900  | 1.49667000  | 2.08781100  |

|          |                          |             |             |          |                          |             |             |
|----------|--------------------------|-------------|-------------|----------|--------------------------|-------------|-------------|
| <b>4</b> |                          |             |             | <b>5</b> |                          |             |             |
|          | Charge=1 Multiplicity =5 |             |             |          | Charge=1 Multiplicity =1 |             |             |
| Fe       | 0.17831600               | 0.38569200  | 0.03149700  | N        | -1.71150800              | 0.72940700  | -0.32421700 |
| N        | 1.99929800               | -0.78186900 | -0.54119500 | H        | -1.90028500              | -1.93486600 | 1.68977600  |
| N        | -1.98608300              | 0.91913100  | -0.05797400 | N        | 1.85500900               | -0.85447100 | 0.12780500  |
| N        | -0.64827200              | -1.39368500 | 1.11341900  | N        | 0.64497000               | 1.63465200  | 0.91959500  |

|   |             |             |             |    |             |             |             |
|---|-------------|-------------|-------------|----|-------------|-------------|-------------|
| C | 1.88817800  | -1.31800000 | -1.77445600 | C  | -1.75923300 | 1.23669300  | -1.57729900 |
| C | -2.59173100 | 0.43737500  | -1.16003500 | C  | 2.49221900  | -0.74876100 | -1.06069700 |
| C | -1.21214000 | -2.33576900 | 0.33895900  | C  | 1.13075800  | 2.55010000  | 0.06328500  |
| C | 0.62307200  | -0.98262700 | -2.54601500 | C  | -0.57413200 | 0.90752600  | -2.45972800 |
| H | 0.48267900  | -1.69306500 | -3.37355000 | H  | -0.45673900 | 1.63917100  | -3.26813100 |
| C | -1.68321300 | -0.16437100 | -2.22068400 | C  | 1.65431600  | -0.19371900 | -2.19307000 |
| H | -1.25078500 | 0.66653800  | -2.78827000 | H  | 1.08525100  | -1.01864200 | -2.62770400 |
| H | -2.27164500 | -0.77258500 | -2.92305500 | H  | 2.27733400  | 0.25126400  | -2.97843100 |
| C | -0.94014500 | -2.27137100 | -1.15614800 | C  | 1.30845600  | 2.10313000  | -1.36938700 |
| H | -1.80973000 | -2.65300000 | -1.70833000 | H  | 2.38145500  | 2.02286300  | -1.57652800 |
| N | -0.55433600 | -0.92992300 | -1.64988400 | N  | 0.66877200  | 0.78323400  | -1.64729700 |
| O | 0.48062500  | 1.47753800  | 1.83330100  | O  | -0.42083800 | -0.66445100 | 1.63441200  |
| H | 0.74578900  | 0.01593700  | -2.97792100 | H  | -0.76576200 | -0.07066100 | -2.90810300 |
| C | -2.72149200 | 1.54985200  | 0.86891100  | C  | 2.46466600  | -1.44429400 | 1.16834500  |
| C | -3.96606300 | 0.56281100  | -1.35764900 | C  | 3.79567600  | -1.20550300 | -1.22372600 |
| C | -4.09640600 | 1.73404200  | 0.73815000  | C  | 3.76347500  | -1.93288100 | 1.06947300  |
| H | -2.17718900 | 1.91158600  | 1.73637700  | H  | 1.87189200  | -1.52770900 | 2.07071200  |
| C | -4.72866100 | 1.22579100  | -0.39502400 | C  | 4.44075200  | -1.80702700 | -0.14157200 |
| H | -4.42934500 | 0.15676200  | -2.25185900 | H  | 4.29092100  | -1.10239000 | -2.18406500 |
| H | -4.65218400 | 2.25812400  | 1.50840700  | H  | 4.22458300  | -2.40758200 | 1.92841500  |
| H | -5.80013700 | 1.34083900  | -0.52960200 | H  | 5.45633100  | -2.17586300 | -0.24765100 |
| H | -0.36899500 | -0.64612200 | 3.01345500  | H  | 0.11298800  | 1.16273500  | 2.84894700  |
| C | -0.82006200 | -1.45380900 | 2.44564900  | C  | 0.51621500  | 1.95113900  | 2.22335500  |
| C | -1.54549900 | -2.46613400 | 3.06423500  | C  | 0.87252300  | 3.19914100  | 2.71760200  |
| C | -2.13234000 | -3.44621900 | 2.26300300  | C  | 1.36870000  | 4.15705100  | 1.83243000  |
| H | -1.65439300 | -2.47787500 | 4.14345500  | H  | 0.75532800  | 3.41236500  | 3.77448700  |
| C | -1.96854200 | -3.37665900 | 0.88140100  | C  | 1.49862000  | 3.82709400  | 0.48566800  |
| H | -2.71494200 | -4.24837900 | 2.70622600  | H  | 1.64933700  | 5.14499500  | 2.18449500  |
| H | -2.41985200 | -4.11921100 | 0.22977200  | H  | 1.88317400  | 4.54595500  | -0.23154100 |
| H | 2.77710600  | -2.51817900 | -3.32694200 | H  | -2.89347500 | 2.32063800  | -3.04649900 |
| C | 2.90194900  | -2.09376100 | -2.33534600 | C  | -2.88228600 | 1.91260900  | -2.04070800 |
| C | 4.07244200  | -2.30815700 | -1.60753900 | C  | -3.99203800 | 2.03484200  | -1.20196400 |
| C | 4.18902700  | -1.74693500 | -0.33767600 | C  | -3.94590300 | 1.47024000  | 0.06987100  |
| H | 4.87634300  | -2.90670800 | -2.02560500 | H  | -4.88182600 | 2.55343800  | -1.54566200 |
| C | 3.12627800  | -0.99421900 | 0.15746100  | C  | -2.78318300 | 0.82366400  | 0.48042100  |
| H | 5.08090900  | -1.88921700 | 0.26328100  | H  | -4.79495800 | 1.51881100  | 0.74252400  |
| H | 3.17618200  | -0.53700500 | 1.14165300  | H  | -2.70203600 | 0.33188400  | 1.44209100  |
| H | -0.11495800 | -2.96116200 | -1.36887000 | H  | 0.91827700  | 2.86292900  | -2.05606200 |
| C | 3.68459300  | 2.06811300  | 3.52086100  | C  | -3.17979100 | -3.28483700 | 2.29751200  |
| O | 3.08968600  | 1.19103500  | 2.92653000  | O  | -2.85315000 | -2.10484700 | 1.57373500  |
| H | 3.19456900  | 3.01333300  | 3.81345800  | H  | -4.22671900 | -3.51869800 | 2.08339800  |
| H | 4.74770800  | 1.95493100  | 3.79591300  | H  | -2.55902900 | -4.13740300 | 1.99038600  |
| H | 0.51368900  | 2.39659400  | 1.39445600  | Fe | 0.00920700  | -0.14146800 | 0.15719200  |
| O | 0.70960800  | 1.90016400  | -1.15753600 | H  | -3.07406200 | -3.14973400 | 3.38456500  |

|   |            |            |             |   |             |             |             |
|---|------------|------------|-------------|---|-------------|-------------|-------------|
| C | 0.78753800 | 3.15069700 | -0.82588800 | O | -0.56473800 | -1.57984900 | -0.90532200 |
| O | 0.66005200 | 3.58498400 | 0.33833600  | C | -0.53614200 | -2.84833800 | -0.49931600 |
| C | 1.05577200 | 4.11816600 | -1.96225700 | O | 0.00487800  | -3.24374000 | 0.52116000  |
| H | 0.25450300 | 4.04870400 | -2.70610800 | C | -1.30252200 | -3.77034400 | -1.43068500 |
| H | 1.12190800 | 5.14147100 | -1.59047300 | H | -1.18419500 | -3.48108300 | -2.47857800 |
| H | 1.98865800 | 3.84616600 | -2.46754900 | H | -0.97757700 | -4.80158000 | -1.28161800 |
| H | 1.33853100 | 1.38534100 | 2.29765800  | H | -2.36638600 | -3.69450300 | -1.17814100 |

|          |                          |             |             |          |                          |             |             |
|----------|--------------------------|-------------|-------------|----------|--------------------------|-------------|-------------|
| <b>5</b> | Charge=1 Multiplicity =3 |             |             | <b>5</b> | Charge=1 Multiplicity =5 |             |             |
| N        | 0.01973500               | 0.41337000  | 0.08077400  | N        | 1.91639700               | -0.22753600 | -0.54160200 |
| H        | -0.47939100              | -0.97226700 | 3.09773500  | H        | 1.53886700               | 2.38347800  | 1.65416500  |
| N        | 3.41705800               | 0.17751700  | 2.03707600  | N        | -2.28387900              | 0.21352700  | 0.19319200  |
| N        | 1.73920500               | 2.36012600  | 1.14749400  | N        | -0.02671600              | -1.59727800 | 1.08685500  |
| C        | 0.31216200               | 0.26238500  | -1.23118400 | C        | 1.91100400               | -0.82844300 | -1.74688100 |
| C        | 4.37765300               | -0.12601000 | 1.13424900  | C        | -2.82298400              | -0.12480300 | -0.99306600 |
| C        | 2.36452000               | 2.86404300  | 0.06905800  | C        | -0.24269200              | -2.65943900 | 0.29062800  |
| C        | 1.74399200               | -0.11815600 | -1.54256400 | C        | 0.58185900               | -0.80676700 | -2.47091200 |
| H        | 2.02573100               | 0.17185900  | -2.56194700 | H        | 0.54167000               | -1.56621700 | -3.26213000 |
| C        | 3.88062800               | -0.38480400 | -0.27220100 | C        | -1.82322700              | -0.39466100 | -2.09811800 |
| H        | 3.56590700               | -1.42906200 | -0.33259100 | H        | -1.56843400              | 0.55940000  | -2.56846400 |
| H        | 4.66629600               | -0.21383400 | -1.01818800 | H        | -2.24071200              | -1.05679700 | -2.86764900 |
| C        | 3.05609300               | 1.86745800  | -0.83229900 | C        | -0.76258000              | -2.37063400 | -1.09891300 |
| H        | 4.13815900               | 1.97347300  | -0.69590700 | H        | -1.83838100              | -2.57878300 | -1.10232500 |
| N        | 2.67677900               | 0.45545900  | -0.53221300 | N        | -0.56299400              | -0.95259300 | -1.52949900 |
| O        | 0.78154600               | 0.46773700  | 2.70322800  | O        | 0.20063200               | 1.02491300  | 1.62591000  |
| H        | 1.81366600               | -1.20624200 | -1.46512500 | H        | 0.48193500               | 0.17646600  | -2.94091000 |
| C        | 3.72997800               | 0.30769500  | 3.33604000  | C        | -3.07881900              | 0.58956100  | 1.20537400  |
| C        | 5.70725700               | -0.26771700 | 1.51637800  | C        | -4.20077900              | -0.13487900 | -1.19340500 |
| C        | 5.03877100               | 0.16743300  | 3.78635800  | C        | -4.46498400              | 0.61807900  | 1.07904400  |
| H        | 2.89715700               | 0.50709600  | 3.99870200  | H        | -2.57412500              | 0.88185800  | 2.11979200  |
| C        | 6.04243900               | -0.11877800 | 2.86344500  | C        | -5.03280600              | 0.24429300  | -0.13816200 |
| H        | 6.46326900               | -0.50236900 | 0.77372700  | H        | -4.61330900              | -0.42014900 | -2.15630900 |
| H        | 5.25634900               | 0.27497700  | 4.84314200  | H        | -5.07949300              | 0.93125000  | 1.91594000  |
| H        | 7.07332400               | -0.23064600 | 3.18507100  | H        | -6.11065400              | 0.25123900  | -0.26918300 |
| H        | 0.66804800               | 2.71616600  | 2.86566000  | H        | 0.51056300               | -0.87360500 | 2.93441600  |
| C        | 1.15735800               | 3.19878300  | 2.02704900  | C        | 0.35362000               | -1.78305100 | 2.36387800  |
| C        | 1.18354300               | 4.57730500  | 1.85894500  | C        | 0.53353000               | -3.05243500 | 2.89950500  |
| C        | 1.82211100               | 5.10642800  | 0.73675500  | C        | 0.32508000               | -4.16069700 | 2.07738500  |
| H        | 0.70535300               | 5.21759800  | 2.59212700  | H        | 0.83686000               | -3.16505200 | 3.93459400  |
| C        | 2.42015900               | 4.23628200  | -0.17164400 | C        | -0.06686500              | -3.96235500 | 0.75454800  |
| H        | 1.85344700               | 6.17889700  | 0.57069800  | H        | 0.46606100               | -5.16697600 | 2.46015500  |
| H        | 2.92797300               | 4.61217800  | -1.05471900 | H        | -0.24009700              | -4.80473300 | 0.09184400  |
| H        | -0.41844800              | 0.22566800  | -3.25226600 | H        | 3.04439800               | -1.80963200 | -3.29475000 |

|    |             |             |             |    |             |             |             |
|----|-------------|-------------|-------------|----|-------------|-------------|-------------|
| C  | -0.67784200 | 0.33884800  | -2.20434700 | C  | 3.07684900  | -1.32138000 | -2.32556000 |
| C  | -2.00174300 | 0.53941500  | -1.80815700 | C  | 4.28475800  | -1.15462700 | -1.64397800 |
| C  | -2.29436600 | 0.64869900  | -0.45129600 | C  | 4.28777200  | -0.49434500 | -0.41736100 |
| H  | -2.79136500 | 0.59613700  | -2.55116900 | H  | 5.20991600  | -1.52612600 | -2.07439700 |
| C  | -1.25411500 | 0.58397300  | 0.47181000  | C  | 3.07680800  | -0.04495000 | 0.10719900  |
| H  | -3.31192800 | 0.77764100  | -0.09966700 | H  | 5.20878700  | -0.32280400 | 0.12913000  |
| H  | -1.42297200 | 0.62405900  | 1.54100300  | H  | 3.02335500  | 0.51490500  | 1.03561800  |
| H  | 2.85385000  | 2.09815700  | -1.88448300 | H  | -0.31090100 | -3.05461100 | -1.82700500 |
| C  | -1.71893800 | -2.17331600 | 4.01943600  | C  | 2.71777300  | 3.77534000  | 2.38546400  |
| O  | -1.32178100 | -1.41362400 | 2.88435600  | O  | 2.41255700  | 2.75965400  | 1.43607600  |
| H  | -2.61254200 | -2.73745200 | 3.73698000  | H  | 3.69284000  | 4.18875700  | 2.11365500  |
| H  | -0.93905500 | -2.88180000 | 4.32977900  | H  | 1.98020900  | 4.58963700  | 2.37107100  |
| Fe | 1.58566600  | 0.33469700  | 1.30232800  | Fe | -0.09931100 | 0.31050400  | 0.20146800  |
| H  | -1.97361000 | -1.53552500 | 4.87932900  | H  | 2.78382100  | 3.38151500  | 3.41043300  |
| O  | 1.53694300  | -1.52619600 | 1.03304200  | O  | -0.09107200 | 1.78181200  | -0.91569500 |
| C  | 1.58369300  | -2.41672000 | 2.02311700  | C  | -0.38825900 | 3.04728200  | -0.54218300 |
| O  | 1.83382200  | -2.15501900 | 3.18861600  | O  | -1.19948100 | 3.30952600  | 0.32116800  |
| C  | 1.24299300  | -3.81925200 | 1.55168900  | C  | 0.41408000  | 4.08120400  | -1.30004400 |
| H  | 1.64196000  | -4.02241000 | 0.55399400  | H  | 0.48566800  | 3.83202600  | -2.36250200 |
| H  | 1.61871500  | -4.55212700 | 2.26793800  | H  | -0.03085000 | 5.06884600  | -1.16867800 |
| H  | 0.15118600  | -3.90084300 | 1.50088300  | H  | 1.42850400  | 4.07918800  | -0.88362200 |

| <b>5-6</b>               |             |             |             | <b>5-6</b>               |             |             |             |
|--------------------------|-------------|-------------|-------------|--------------------------|-------------|-------------|-------------|
| Charge=1 Multiplicity =1 |             |             |             | Charge=1 Multiplicity =3 |             |             |             |
| Fe                       | 0.11275100  | 0.12375800  | 0.13223400  | Fe                       | -0.02770900 | 0.01986800  | 0.04556600  |
| N                        | 1.89456200  | -0.75420700 | -0.10418600 | N                        | -0.01025500 | 0.00491800  | 2.04277200  |
| N                        | -1.72142300 | 0.81713600  | -0.10888000 | N                        | 0.46469600  | 0.01128900  | -1.86792900 |
| N                        | -0.75981200 | -1.54660200 | 0.87099800  | N                        | -0.13066100 | -1.99669400 | -0.09745200 |
| C                        | 2.14471300  | -1.16618200 | -1.36890800 | C                        | 1.22281200  | 0.12539100  | 2.58773700  |
| C                        | -2.24767900 | 0.59019400  | -1.33135900 | C                        | 1.79387500  | -0.00001000 | -2.10548100 |
| C                        | -1.18341900 | -2.45689000 | -0.02497600 | C                        | 1.02881800  | -2.67095000 | 0.01048600  |
| C                        | 1.06554500  | -0.83677600 | -2.37688900 | C                        | 2.34506300  | 0.32234500  | 1.59324600  |
| H                        | 1.07725500  | -1.52862500 | -3.22784700 | H                        | 3.31007900  | -0.01113600 | 1.99356200  |
| C                        | -1.28314600 | 0.02044600  | -2.35012800 | C                        | 2.66374800  | 0.18473800  | -0.88099100 |
| H                        | -0.75179600 | 0.85703200  | -2.81186200 | H                        | 2.77229000  | 1.25879500  | -0.70753700 |
| H                        | -1.80726300 | -0.52647800 | -3.14289700 | H                        | 3.66481200  | -0.23860300 | -1.02529500 |
| C                        | -0.73983300 | -2.23092400 | -1.45082100 | C                        | 2.22216100  | -1.86098300 | 0.45962100  |
| H                        | -1.54044200 | -2.48081200 | -2.15620700 | H                        | 3.12592100  | -2.15900200 | -0.08369300 |
| N                        | -0.25691800 | -0.83562600 | -1.68424100 | N                        | 1.99803400  | -0.38818400 | 0.32646400  |
| O                        | 0.34960500  | 0.70563700  | 1.73914900  | O                        | -1.73108600 | 0.12435300  | -0.17941600 |
| H                        | 1.24243400  | 0.17696900  | -2.74153100 | H                        | 2.40605500  | 1.38765000  | 1.36156500  |
| C                        | -2.44147400 | 1.45267300  | 0.82752000  | C                        | -0.40287400 | 0.00322000  | -2.89140900 |
| C                        | -3.55127000 | 0.96611200  | -1.63989600 | C                        | 2.29795100  | -0.06363100 | -3.40058200 |
| C                        | -3.74796100 | 1.86348500  | 0.58435900  | C                        | 0.03237200  | -0.05141000 | -4.21143600 |



|   |             |             |             |   |             |             |             |
|---|-------------|-------------|-------------|---|-------------|-------------|-------------|
| H | -1.92734500 | 1.62995700  | 1.76397500  | H | -1.44778100 | 0.05781100  | -2.61296500 |
| C | -4.31327600 | 1.61118100  | -0.66451300 | C | 1.40139000  | -0.09216300 | -4.46994600 |
| H | -3.95583400 | 0.76909500  | -2.62769000 | H | 3.37038800  | -0.07703700 | -3.56752800 |
| H | -4.30289500 | 2.37727200  | 1.36150100  | H | -0.69427900 | -0.05425100 | -5.01630200 |
| H | -5.33178900 | 1.91787600  | -0.88209100 | H | 1.76994000  | -0.13801700 | -5.49014700 |
| H | -0.66406300 | -0.94732100 | 2.83294000  | H | -2.14754300 | -2.04905900 | -0.47839900 |
| C | -1.03755200 | -1.72568600 | 2.17645800  | C | -1.25774500 | -2.66487300 | -0.40751000 |
| C | -1.75516500 | -2.82492100 | 2.63304200  | C | -1.26366800 | -4.03777300 | -0.62469700 |
| C | -2.21016500 | -3.76386600 | 1.70712900  | C | -0.06211000 | -4.73994300 | -0.52907300 |
| H | -1.95621800 | -2.93339900 | 3.69327100  | H | -2.19328600 | -4.53945600 | -0.87045600 |
| C | -1.91972800 | -3.57640800 | 0.35708500  | C | 1.10227700  | -4.04530900 | -0.20668200 |
| H | -2.78180900 | -4.62873400 | 2.02961700  | H | -0.03062800 | -5.81129300 | -0.70225900 |
| H | -2.25348400 | -4.28927700 | -0.39077400 | H | 2.05419000  | -4.56016000 | -0.11902400 |
| H | 3.50989100  | -2.12112500 | -2.72730600 | H | 2.41254800  | 0.21857500  | 4.37546900  |
| C | 3.33952700  | -1.79198500 | -1.70704300 | C | 1.41147100  | 0.13052600  | 3.96518200  |
| C | 4.30995600  | -1.97558100 | -0.72026000 | C | 0.29690300  | 0.03442100  | 4.80065300  |
| C | 4.04932600  | -1.53545700 | 0.57502900  | C | -0.96923300 | -0.06994400 | 4.23038100  |
| H | 5.25308700  | -2.45545500 | -0.96298400 | H | 0.41953500  | 0.04314700  | 5.87934300  |
| C | 2.82481100  | -0.93199800 | 0.84766100  | C | -1.08501900 | -0.08635100 | 2.84309400  |
| H | 4.77771900  | -1.65201600 | 1.36986600  | H | -1.86196900 | -0.13634900 | 4.84233500  |
| H | 2.57339200  | -0.56096200 | 1.83325000  | H | -2.04541500 | -0.14616200 | 2.34648400  |
| H | 0.08764300  | -2.91733600 | -1.66215700 | H | 2.40626700  | -2.08315900 | 1.51662100  |
| C | 1.93058600  | 3.16884500  | 2.75570600  | C | -3.71949500 | 2.53284700  | 0.18815400  |
| O | 2.28887000  | 1.97913800  | 2.11493000  | O | -2.85751500 | 1.85543700  | 1.04379900  |
| H | 2.83865900  | 3.79074600  | 2.80310600  | H | -4.09743700 | 3.40715600  | 0.74840300  |
| H | 1.19069700  | 3.72704400  | 2.16246500  | H | -3.18832700 | 2.92787900  | -0.69117400 |
| H | 1.31545300  | 1.27248000  | 1.99283400  | H | -2.23619000 | 0.91166500  | 0.37399600  |
| H | 1.55428600  | 3.01172600  | 3.77730000  | H | -4.58780500 | 1.93137400  | -0.12347800 |
| O | 0.86471500  | 1.54737800  | -0.85030500 | O | 0.37741300  | 1.85575000  | 0.21688000  |
| C | 0.65136400  | 2.83470900  | -0.60813700 | C | -0.13754500 | 2.81833700  | -0.53964700 |
| O | -0.15867100 | 3.28139100  | 0.19227300  | O | -0.82127800 | 2.64543900  | -1.53856600 |
| C | 1.56051300  | 3.73565900  | -1.42887000 | C | 0.19300300  | 4.20552500  | -0.01254700 |
| H | 1.64592800  | 3.38472400  | -2.46169400 | H | 1.23232100  | 4.26973200  | 0.32326200  |
| H | 1.18476300  | 4.76009100  | -1.40947800 | H | -0.00002800 | 4.95221500  | -0.78474200 |
| H | 2.56514600  | 3.71579600  | -0.99102300 | H | -0.44626400 | 4.41426700  | 0.85296700  |

**5-6**

Charge=1 Multiplicity =5

|    |             |             |             |
|----|-------------|-------------|-------------|
| Fe | 0.10673200  | 0.12100300  | 0.12303600  |
| N  | 1.85810100  | -0.80487600 | -0.13154900 |
| N  | -1.70824500 | 0.86832300  | -0.10361600 |
| N  | -0.79721900 | -1.52111500 | 0.88716800  |
| C  | 2.07708800  | -1.24028700 | -1.39425100 |
| C  | -2.25616500 | 0.65322100  | -1.31884700 |

**6**

Charge=1 Multiplicity =1

|    |             |             |             |
|----|-------------|-------------|-------------|
| Fe | 0.10936500  | 0.04160100  | 0.12654900  |
| N  | 1.60108400  | -1.26306800 | -0.08099400 |
| N  | -1.46805900 | 1.19601900  | -0.13031400 |
| N  | -1.15447200 | -1.29569700 | 0.93374400  |
| C  | 1.72550900  | -1.77207500 | -1.32823200 |
| C  | -2.05078000 | 1.07775200  | -1.34268300 |

|   |             |             |             |   |             |             |             |
|---|-------------|-------------|-------------|---|-------------|-------------|-------------|
| C | -1.26196700 | -2.42266000 | 0.00292300  | C | -1.81217600 | -2.09736100 | 0.07576900  |
| C | 0.99645300  | -0.88328700 | -2.39025900 | C | 0.75518700  | -1.21086300 | -2.34564700 |
| H | 0.97426400  | -1.57942400 | -3.23738300 | H | 0.57685000  | -1.91274300 | -3.16956900 |
| C | -1.32093200 | 0.04941300  | -2.34400300 | C | -1.28561100 | 0.23427400  | -2.34189900 |
| H | -0.76715300 | 0.86709500  | -2.81324900 | H | -0.55853900 | 0.88309200  | -2.83749700 |
| H | -1.86839000 | -0.48452700 | -3.12973000 | H | -1.94725500 | -0.18229500 | -3.11089500 |
| C | -0.84275000 | -2.21306600 | -1.43310100 | C | -1.34147800 | -2.04877900 | -1.35959900 |
| H | -1.66778400 | -2.43486200 | -2.11933200 | H | -2.18816400 | -2.10483800 | -2.05326800 |
| N | -0.31695600 | -0.83500800 | -1.68128600 | N | -0.51132000 | -0.83856700 | -1.64886300 |
| O | 0.37778700  | 0.71487700  | 1.71579200  | O | 0.53306700  | 0.59866000  | 1.76584400  |
| H | 1.20132400  | 0.12247100  | -2.76274900 | H | 1.18520600  | -0.29232600 | -2.74972800 |
| C | -2.39633600 | 1.53181000  | 0.83796200  | C | -1.97818600 | 2.03146700  | 0.78652400  |
| C | -3.55053200 | 1.06909700  | -1.61395700 | C | -3.20894200 | 1.78013300  | -1.66010800 |
| C | -3.69181600 | 1.98298500  | 0.60760200  | C | -3.12787000 | 2.77280300  | 0.53171600  |
| H | -1.86649800 | 1.69842500  | 1.76740000  | H | -1.42222100 | 2.08556700  | 1.71474300  |
| C | -4.27996900 | 1.74273500  | -0.63298400 | C | -3.75587700 | 2.63982800  | -0.70557500 |
| H | -3.97251900 | 0.88061000  | -2.59608300 | H | -3.66573500 | 1.66603200  | -2.63819300 |
| H | -4.22038500 | 2.51823300  | 1.38860400  | H | -3.51555700 | 3.44237500  | 1.29158400  |
| H | -5.29072600 | 2.08072600  | -0.84004500 | H | -4.65715400 | 3.20185500  | -0.93066000 |
| H | -0.64749800 | -0.91699200 | 2.84377100  | H | -0.87753900 | -0.66006000 | 2.86247700  |
| C | -1.05389400 | -1.68788700 | 2.19835900  | C | -1.45330700 | -1.34168200 | 2.24559800  |
| C | -1.79112400 | -2.76646600 | 2.67293100  | C | -2.42858500 | -2.19667800 | 2.74671900  |
| C | -2.28842800 | -3.69629900 | 1.75968100  | C | -3.12393900 | -3.02009300 | 1.86114700  |
| H | -1.97433000 | -2.86611600 | 3.73725200  | H | -2.63972000 | -2.20682200 | 3.81055500  |
| C | -2.01970000 | -3.52122400 | 0.40344200  | C | -2.81101000 | -2.96914200 | 0.50369000  |
| H | -2.87606400 | -4.54480600 | 2.09657300  | H | -3.89803700 | -3.69168000 | 2.21975400  |
| H | -2.38667100 | -4.22771100 | -0.33486900 | H | -3.32871400 | -3.59867100 | -0.21367200 |
| H | 3.39231200  | -2.25449100 | -2.75869800 | H | 2.78852200  | -3.09806900 | -2.64560800 |
| C | 3.24677300  | -1.90725000 | -1.74061900 | C | 2.71603100  | -2.69747000 | -1.63932300 |
| C | 4.22539800  | -2.10710000 | -0.76498500 | C | 3.61254500  | -3.08888800 | -0.64298200 |
| C | 3.99881500  | -1.63854200 | 0.52664800  | C | 3.48285300  | -2.55047800 | 0.63552700  |
| H | 5.14957100  | -2.61944300 | -1.01417500 | H | 4.39764700  | -3.80524400 | -0.86470500 |
| C | 2.79765200  | -0.99396700 | 0.80943600  | C | 2.45732700  | -1.64184300 | 0.88067600  |
| H | 4.73639300  | -1.76349100 | 1.31165700  | H | 4.16033700  | -2.82568900 | 1.43636800  |
| H | 2.57700300  | -0.59278900 | 1.79072600  | H | 2.29890600  | -1.18589200 | 1.85104000  |
| H | -0.04517100 | -2.92829800 | -1.66292400 | H | -0.72541700 | -2.93537000 | -1.54659600 |
| C | 2.16133600  | 3.08461200  | 2.76127400  | C | 2.93673600  | 3.10390600  | 2.52086100  |
| O | 2.42960400  | 1.91024900  | 2.06634500  | O | 3.11438400  | 1.84054100  | 2.02352300  |
| H | 3.09889700  | 3.66949900  | 2.76604800  | H | 3.87814900  | 3.64678600  | 2.68603400  |
| H | 1.40970000  | 3.69869500  | 2.24228400  | H | 2.34042400  | 3.63100700  | 1.74043400  |
| H | 1.30658900  | 1.25817100  | 1.86881600  | H | 1.41720500  | 1.01989000  | 1.82209400  |
| H | 1.86485600  | 2.91479700  | 3.80822600  | H | 2.29584800  | 3.11287200  | 3.41880200  |
| O | 0.88773400  | 1.52383300  | -0.86995900 | O | 1.20653500  | 1.21297000  | -0.91165500 |
| C | 0.73338000  | 2.81609900  | -0.60479300 | C | 1.38223100  | 2.50202000  | -0.70533800 |

|   |             |            |             |   |            |            |             |
|---|-------------|------------|-------------|---|------------|------------|-------------|
| O | -0.04491200 | 3.28352100 | 0.21435400  | O | 0.83827800 | 3.16196300 | 0.17691500  |
| C | 1.66813300  | 3.68933700 | -1.42642600 | C | 2.38881900 | 3.12657400 | -1.66165100 |
| H | 1.72886900  | 3.34650000 | -2.46365600 | H | 2.27560300 | 2.73449500 | -2.67660500 |
| H | 1.33305300  | 4.72742400 | -1.39196800 | H | 2.27774500 | 4.21249600 | -1.66447900 |
| H | 2.67535900  | 3.62545800 | -0.99891500 | H | 3.40252400 | 2.87729100 | -1.32583900 |

|                          |             |             |             |                          |             |             |             |
|--------------------------|-------------|-------------|-------------|--------------------------|-------------|-------------|-------------|
| <b>6</b>                 |             |             |             | <b>6</b>                 |             |             |             |
| Charge=1 Multiplicity =3 |             |             |             | Charge=1 Multiplicity =5 |             |             |             |
| Fe                       | 0.03745900  | 0.01421400  | 0.03155600  | Fe                       | 0.15121400  | 0.23735500  | 0.20104800  |
| N                        | 0.06850800  | 0.00565300  | 2.02392400  | N                        | 2.25865600  | -0.46421600 | -0.09892700 |
| N                        | 0.49502300  | -0.01483500 | -1.88575600 | N                        | -2.03517600 | 0.23269700  | -0.32403600 |
| N                        | -0.22722900 | -1.97119900 | -0.12774000 | N                        | -0.32050800 | -1.47595500 | 1.19572700  |
| C                        | 1.30954300  | 0.04128500  | 2.56126000  | C                        | 2.50424400  | -0.95100300 | -1.32677900 |
| C                        | 1.81646200  | -0.12834900 | -2.13932400 | C                        | -2.32244400 | -0.34309800 | -1.50189100 |
| C                        | 0.87566000  | -2.73592300 | -0.02652200 | C                        | -0.48384200 | -2.58355300 | 0.44753800  |
| C                        | 2.43669500  | 0.14538000  | 1.55615400  | C                        | 1.32080800  | -0.91357600 | -2.26933700 |
| H                        | 3.37493600  | -0.26263300 | 1.95178000  | H                        | 1.41999500  | -1.65939700 | -3.06934600 |
| C                        | 2.71388500  | -0.02080300 | -0.92343600 | C                        | -1.11796200 | -0.69048300 | -2.35003300 |
| H                        | 2.91468000  | 1.03991600  | -0.75089400 | H                        | -0.82216700 | 0.21315000  | -2.89196900 |
| H                        | 3.67423200  | -0.52569700 | -1.08304000 | H                        | -1.35872800 | -1.46259000 | -3.09254300 |
| C                        | 2.12844600  | -2.02338700 | 0.42846800  | C                        | -0.08338100 | -2.49572000 | -1.01007500 |
| H                        | 3.00861000  | -2.39226400 | -0.11045900 | H                        | -0.78801000 | -3.05985500 | -1.63246400 |
| N                        | 2.02186000  | -0.53733600 | 0.29522100  | N                        | 0.04706700  | -1.09374000 | -1.51733300 |
| O                        | -1.72019000 | 0.24183000  | -0.15777200 | O                        | 0.41108100  | 1.04216200  | 1.76087700  |
| H                        | 2.58118700  | 1.20160500  | 1.32076100  | H                        | 1.28046300  | 0.07969600  | -2.72572400 |
| C                        | -0.38442200 | 0.04941900  | -2.89634300 | C                        | -3.02795500 | 0.70065900  | 0.44481800  |
| C                        | 2.29757700  | -0.22256500 | -3.44127900 | C                        | -3.63393200 | -0.50389500 | -1.94431100 |
| C                        | 0.02882700  | -0.02749400 | -4.22284200 | C                        | -4.36518200 | 0.59188500  | 0.07052600  |
| H                        | -1.41743500 | 0.17601300  | -2.59557200 | H                        | -2.72464700 | 1.18105000  | 1.36884000  |
| C                        | 1.38737500  | -0.17287200 | -4.49883300 | C                        | -4.67107200 | -0.02783100 | -1.14073600 |
| H                        | 3.36319700  | -0.32003500 | -3.62370400 | H                        | -3.83826700 | -0.97883200 | -2.89914400 |
| H                        | -0.70514400 | 0.03006400  | -5.01908300 | H                        | -5.14401700 | 0.98534200  | 0.71482500  |
| H                        | 1.73846700  | -0.24059900 | -5.52400900 | H                        | -5.70325200 | -0.13597300 | -1.46030400 |
| H                        | -2.23803800 | -1.85276900 | -0.50626700 | H                        | -0.40324200 | -0.57295100 | 3.03385000  |
| C                        | -1.40418100 | -2.54366900 | -0.44296700 | C                        | -0.57516200 | -1.51146100 | 2.51611300  |
| C                        | -1.51787700 | -3.91063200 | -0.67065200 | C                        | -1.01343000 | -2.67029700 | 3.14602700  |
| C                        | -0.37610800 | -4.70695200 | -0.58132600 | C                        | -1.20245600 | -3.81976200 | 2.37800600  |
| H                        | -2.48401400 | -4.33569900 | -0.92030200 | H                        | -1.20663300 | -2.66595200 | 4.21321500  |
| C                        | 0.84038900  | -4.10979600 | -0.25452900 | C                        | -0.93429500 | -3.77655300 | 1.01058800  |
| H                        | -0.42989000 | -5.77602600 | -0.76311200 | H                        | -1.55306300 | -4.73957500 | 2.83643600  |
| H                        | 1.74851400  | -4.69923300 | -0.17205000 | H                        | -1.06623200 | -4.65674100 | 0.38873200  |
| H                        | 2.51149300  | 0.05842900  | 4.34416800  | H                        | 3.94022600  | -1.78943800 | -2.70102100 |
| C                        | 1.50491600  | 0.03914000  | 3.93824400  | C                        | 3.77061500  | -1.39149800 | -1.70506400 |
| C                        | 0.39040500  | 0.02206400  | 4.77920000  | C                        | 4.81282000  | -1.29913900 | -0.78057900 |

|   |             |             |             |   |             |             |             |
|---|-------------|-------------|-------------|---|-------------|-------------|-------------|
| C | -0.88372800 | -0.00351600 | 4.21597400  | C | 4.55552100  | -0.77995700 | 0.48778100  |
| H | 0.51887900  | 0.02640200  | 5.85724800  | H | 5.81152300  | -1.63019800 | -1.04919200 |
| C | -1.00486700 | -0.01721100 | 2.82941000  | C | 3.25718900  | -0.37486200 | 0.79062000  |
| H | -1.77494600 | -0.01422500 | 4.83378100  | H | 5.34113900  | -0.69014900 | 1.23030800  |
| H | -1.96436500 | -0.03802100 | 2.32589700  | H | 2.98722000  | 0.03997000  | 1.75697800  |
| H | 2.28901300  | -2.25833100 | 1.48656300  | H | 0.88933900  | -2.98866700 | -1.11797800 |
| C | -3.41145500 | 3.37361500  | -0.04083500 | C | 0.51379500  | 4.66971700  | 2.38343400  |
| O | -2.78823200 | 2.67268800  | 0.95687100  | O | 1.36694400  | 3.76061100  | 1.81224800  |
| H | -3.87638000 | 4.30806800  | 0.30406900  | H | 0.96777500  | 5.66103800  | 2.52444500  |
| H | -2.59837000 | 3.61301900  | -0.76463900 | H | -0.31469900 | 4.76101000  | 1.64827100  |
| H | -2.05370200 | 1.07895900  | 0.22983900  | H | 0.66554400  | 1.98948300  | 1.72075400  |
| H | -4.12101300 | 2.74908500  | -0.60963400 | H | 0.05339200  | 4.29497500  | 3.31202700  |
| O | 0.58959400  | 1.83741100  | 0.19290400  | O | 0.44621200  | 1.67822600  | -0.96325000 |
| C | 0.15124800  | 2.84965600  | -0.52689900 | C | -0.09885500 | 2.87707300  | -0.79908500 |
| O | -0.66318500 | 2.77063500  | -1.44355800 | O | -0.94936000 | 3.13899900  | 0.04320400  |
| C | 0.72674000  | 4.18820200  | -0.08544600 | C | 0.45529700  | 3.92042300  | -1.75130300 |
| H | 1.78625400  | 4.10425600  | 0.17347300  | H | 0.60668600  | 3.50747300  | -2.75238300 |
| H | 0.59085400  | 4.93162700  | -0.87312200 | H | -0.21527400 | 4.78053400  | -1.79477400 |
| H | 0.19610600  | 4.52608800  | 0.81275000  | H | 1.43213800  | 4.25146000  | -1.37927500 |

|            |                          |             |             |            |                          |             |             |
|------------|--------------------------|-------------|-------------|------------|--------------------------|-------------|-------------|
| <b>6-4</b> | Charge=1 Multiplicity =1 |             |             | <b>6-4</b> | Charge=1 Multiplicity =3 |             |             |
| Fe         | 0.16280700               | -0.27882800 | 0.12961800  | Fe         | 0.16280700               | -0.27882800 | 0.12961800  |
| N          | -1.62956700              | -0.92790600 | -0.46445900 | N          | -1.62956700              | -0.92790600 | -0.46445900 |
| N          | 2.00966600               | 0.47398500  | 0.23056300  | N          | 2.00966600               | 0.47398500  | 0.23056300  |
| N          | -0.71511300              | 1.52872500  | 0.21874900  | N          | -0.71511300              | 1.52872500  | 0.21874900  |
| C          | -1.72720400              | -1.06756600 | -1.80743100 | C          | -1.72720400              | -1.06756600 | -1.80743100 |
| C          | 2.63397900               | 0.57327300  | -0.96638000 | C          | 2.63397900               | 0.57327300  | -0.96638000 |
| C          | -0.74237000              | 2.21892900  | -0.93972200 | C          | -0.74237000              | 2.21892900  | -0.93972200 |
| C          | -0.45344800              | -0.81508200 | -2.58595300 | C          | -0.45344800              | -0.81508200 | -2.58595300 |
| H          | -0.66990500              | -0.50415900 | -3.61514300 | H          | -0.66990500              | -0.50415900 | -3.61514300 |
| C          | 1.85745200               | 0.01717100  | -2.14068400 | C          | 1.85745200               | 0.01717100  | -2.14068400 |
| H          | 2.05129200               | -1.05558200 | -2.20806500 | H          | 2.05129200               | -1.05558200 | -2.20806500 |
| H          | 2.16169500               | 0.48507500  | -3.08481300 | H          | 2.16169500               | 0.48507500  | -3.08481300 |
| C          | -0.03200800              | 1.60145700  | -2.12609400 | C          | -0.03200800              | 1.60145700  | -2.12609400 |
| H          | 0.85669100               | 2.19961700  | -2.35497300 | H          | 0.85669100               | 2.19961700  | -2.35497300 |
| N          | 0.39884200               | 0.19009100  | -1.88415900 | N          | 0.39884200               | 0.19009100  | -1.88415900 |
| O          | 0.05355800               | -0.60706200 | 1.96352900  | O          | 0.05355800               | -0.60706200 | 1.96352900  |
| H          | 0.11537500               | -1.74745700 | -2.62214200 | H          | 0.11537500               | -1.74745700 | -2.62214200 |
| C          | 2.63737700               | 0.89098500  | 1.34284000  | C          | 2.63737700               | 0.89098500  | 1.34284000  |
| C          | 3.91455500               | 1.10459500  | -1.07646400 | C          | 3.91455500               | 1.10459500  | -1.07646400 |
| C          | 3.92350800               | 1.42048300  | 1.30749100  | C          | 3.92350800               | 1.42048300  | 1.30749100  |
| H          | 2.08011600               | 0.77578700  | 2.26480000  | H          | 2.08011600               | 0.77578700  | 2.26480000  |

|   |             |             |             |   |             |             |             |
|---|-------------|-------------|-------------|---|-------------|-------------|-------------|
| C | 4.57232100  | 1.52974800  | 0.07926200  | C | 4.57232100  | 1.52974800  | 0.07926200  |
| H | 4.38973900  | 1.17883400  | -2.04958900 | H | 4.38973900  | 1.17883400  | -2.04958900 |
| H | 4.39907200  | 1.73796200  | 2.22887600  | H | 4.39907200  | 1.73796200  | 2.22887600  |
| H | 5.57441000  | 1.94282900  | 0.01767400  | H | 5.57441000  | 1.94282900  | 0.01767400  |
| H | -1.37245000 | 1.41421200  | 2.18905800  | H | -1.37245000 | 1.41421200  | 2.18905800  |
| C | -1.33895400 | 2.03606700  | 1.30172700  | C | -1.33895400 | 2.03606700  | 1.30172700  |
| C | -1.98226800 | 3.26869600  | 1.26873300  | C | -1.98226800 | 3.26869600  | 1.26873300  |
| C | -1.99416100 | 3.99648900  | 0.08078800  | C | -1.99416100 | 3.99648900  | 0.08078800  |
| H | -2.47683400 | 3.63062700  | 2.16331000  | H | -2.47683400 | 3.63062700  | 2.16331000  |
| C | -1.37235900 | 3.45641100  | -1.04364100 | C | -1.37235900 | 3.45641100  | -1.04364100 |
| H | -2.49103900 | 4.96012200  | 0.02304400  | H | -2.49103900 | 4.96012200  | 0.02304400  |
| H | -1.37741900 | 3.98387800  | -1.99287200 | H | -1.37741900 | 3.98387800  | -1.99287200 |
| H | -2.96241100 | -1.56798300 | -3.49396800 | H | -2.96241100 | -1.56798300 | -3.49396800 |
| C | -2.91087200 | -1.47209300 | -2.41385800 | C | -2.91087200 | -1.47209300 | -2.41385800 |
| C | -4.01899100 | -1.75341800 | -1.61216300 | C | -4.01899100 | -1.75341800 | -1.61216300 |
| C | -3.91217200 | -1.59377200 | -0.23340400 | C | -3.91217200 | -1.59377200 | -0.23340400 |
| H | -4.95186500 | -2.07790800 | -2.06308700 | H | -4.95186500 | -2.07790800 | -2.06308700 |
| C | -2.70197900 | -1.16857100 | 0.31126400  | C | -2.70197900 | -1.16857100 | 0.31126400  |
| H | -4.75264400 | -1.77981400 | 0.42624900  | H | -4.75264400 | -1.77981400 | 0.42624900  |
| H | -2.60177500 | -0.97468700 | 1.37826200  | H | -2.60177500 | -0.97468700 | 1.37826200  |
| H | -0.67344900 | 1.64784200  | -3.01358800 | H | -0.67344900 | 1.64784200  | -3.01358800 |
| C | -1.68481500 | -0.68108100 | 3.92374000  | C | -1.68481500 | -0.68108100 | 3.92374000  |
| O | -2.59912200 | -0.02887600 | 3.27339500  | O | -2.59912200 | -0.02887600 | 3.27339500  |
| H | -1.17521600 | -0.17447600 | 4.76628000  | H | -1.17521600 | -0.17447600 | 4.76628000  |
| H | -1.82702200 | -1.76726100 | 4.08909500  | H | -1.82702200 | -1.76726100 | 4.08909500  |
| H | 0.79357000  | -1.26138800 | 2.13433200  | H | 0.79357000  | -1.26138800 | 2.13433200  |
| H | -0.73171000 | -0.68778100 | 2.96784200  | H | -0.73171000 | -0.68778100 | 2.96784200  |
| O | 0.92879400  | -1.99714000 | -0.26294600 | O | 0.92879400  | -1.99714000 | -0.26294600 |
| C | 1.68362500  | -2.70328000 | 0.54174100  | C | 1.68362500  | -2.70328000 | 0.54174100  |
| O | 1.94718700  | -2.39306500 | 1.71111900  | O | 1.94718700  | -2.39306500 | 1.71111900  |
| C | 2.20745500  | -3.99272200 | -0.05857700 | C | 2.20745500  | -3.99272200 | -0.05857700 |
| H | 2.61044900  | -3.82591200 | -1.06218200 | H | 2.61044900  | -3.82591200 | -1.06218200 |
| H | 2.97421000  | -4.42059600 | 0.58858700  | H | 2.97421000  | -4.42059600 | 0.58858700  |
| H | 1.38197600  | -4.70770500 | -0.15200300 | H | 1.38197600  | -4.70770500 | -0.15200300 |

|                          |             |             |             |                          |             |             |             |
|--------------------------|-------------|-------------|-------------|--------------------------|-------------|-------------|-------------|
| <b>7</b>                 |             |             |             | <b>7</b>                 |             |             |             |
| Charge=2 Multiplicity =1 |             |             |             | Charge=2 Multiplicity =3 |             |             |             |
| Fe                       | 0.00015000  | -0.35284400 | -0.52241500 | Fe                       | 0.00021000  | -0.35235000 | -0.52345900 |
| N                        | 1.96492700  | -0.35256700 | -0.23861700 | N                        | 1.96629100  | -0.35180400 | -0.23965900 |
| N                        | -1.96463300 | -0.35552400 | -0.23878100 | N                        | -1.96588100 | -0.35549500 | -0.23988100 |
| N                        | -0.00132700 | 1.61641800  | -0.49299300 | N                        | -0.00162800 | 1.61626400  | -0.49197900 |
| C                        | 2.36542900  | -0.51497200 | 1.04683100  | C                        | 2.36618500  | -0.51454500 | 1.04601300  |

|   |             |             |             |   |             |             |             |
|---|-------------|-------------|-------------|---|-------------|-------------|-------------|
| C | 3.71110600  | -0.47514600 | 1.39319000  | C | 3.71180500  | -0.47479300 | 1.39257000  |
| H | 4.00952800  | -0.59821100 | 2.42954700  | H | 4.01022300  | -0.59807900 | 2.42891300  |
| C | 4.66438500  | -0.28233600 | 0.39020900  | C | 4.66519100  | -0.28195800 | 0.38959400  |
| H | 5.72045600  | -0.25022400 | 0.63963400  | H | 5.72122800  | -0.24992900 | 0.63919800  |
| C | 4.24197400  | -0.13094200 | -0.93000100 | C | 4.24311900  | -0.13068300 | -0.93070800 |
| H | 4.95099200  | 0.01707800  | -1.73725100 | H | 4.95238800  | 0.01711300  | -1.73777000 |
| C | 2.87973500  | -0.16666300 | -1.20906200 | C | 2.88080100  | -0.16634400 | -1.21001200 |
| H | 2.48942800  | -0.05383700 | -2.21424400 | H | 2.48978000  | -0.05438400 | -2.21501200 |
| C | -2.36500700 | -0.51873500 | 1.04659600  | C | -2.36559500 | -0.51919100 | 1.04571900  |
| C | -3.71078900 | -0.48120800 | 1.39280800  | C | -3.71133500 | -0.48226600 | 1.39212500  |
| H | -4.00912200 | -0.60489200 | 2.42911700  | H | -4.00961300 | -0.60630300 | 2.42841900  |
| C | -4.66427400 | -0.28990200 | 0.38973600  | C | -4.66499800 | -0.29129500 | 0.38905800  |
| H | -5.72042900 | -0.25962200 | 0.63903200  | H | -5.72113200 | -0.26150900 | 0.63852500  |
| C | -4.24196000 | -0.13763000 | -0.93040500 | C | -4.24307300 | -0.13897800 | -0.93117200 |
| H | -4.95113200 | 0.00928100  | -1.73772100 | H | -4.95254900 | 0.00742600  | -1.73830600 |
| C | -2.87963300 | -0.17103100 | -1.20930800 | C | -2.88065500 | -0.17179900 | -1.21031400 |
| H | -2.48939000 | -0.05743500 | -2.21442600 | H | -2.48974500 | -0.05891400 | -2.21525400 |
| C | -0.00206000 | 2.21938800  | 0.71289200  | C | -0.00258400 | 2.21873900  | 0.71432200  |
| C | -0.00339900 | 3.60766400  | 0.83105200  | C | -0.00432200 | 3.60697400  | 0.83278800  |
| H | -0.00398600 | 4.06680400  | 1.81498300  | H | -0.00508900 | 4.06569700  | 1.81691500  |
| C | -0.00396400 | 4.38843100  | -0.32269100 | C | -0.00502900 | 4.38817800  | -0.32063300 |
| H | -0.00500500 | 5.47165100  | -0.25136700 | H | -0.00638200 | 5.47137200  | -0.24892300 |
| C | -0.00317200 | 3.75576600  | -1.56720800 | C | -0.00398300 | 3.75596900  | -1.56536000 |
| H | -0.00356500 | 4.32352200  | -2.49124600 | H | -0.00447900 | 4.32395700  | -2.48925000 |
| C | -0.00186900 | 2.36919100  | -1.61575100 | C | -0.00231000 | 2.36941100  | -1.61451900 |
| H | -0.00123200 | 1.81902800  | -2.54923600 | H | -0.00147400 | 1.82037400  | -2.54866300 |
| C | 1.25436200  | -0.81001600 | 2.03113900  | C | 1.25507700  | -0.81056400 | 2.03041400  |
| H | 1.52357600  | -0.50930000 | 3.04976100  | H | 1.52454400  | -0.51040300 | 3.04912400  |
| C | -1.25356100 | -0.81202400 | 2.03099800  | C | -1.25402500 | -0.81306000 | 2.03022900  |
| H | -1.06837700 | -1.89087800 | 2.04796800  | H | -1.06868700 | -1.89189400 | 2.04663100  |
| H | -1.52335200 | -0.51175300 | 3.04960000  | H | -1.52421100 | -0.51346500 | 3.04891500  |
| C | -0.00130000 | 1.32133000  | 1.92683100  | C | -0.00156700 | 1.32042400  | 1.92792200  |
| H | 0.87474200  | 1.54232500  | 2.54539500  | H | 0.87454100  | 1.54135100  | 2.54641600  |
| H | -0.87763100 | 1.54090600  | 2.54548800  | H | -0.87792600 | 1.53958700  | 2.54668400  |
| N | -0.00011000 | -0.13992800 | 1.57129800  | N | -0.00010400 | -0.14060900 | 1.57199000  |
| O | 0.00018200  | -0.39693700 | -2.14403500 | O | 0.00031100  | -0.39437400 | -2.14377200 |
| H | 1.07091700  | -1.88916600 | 2.04808000  | H | 1.07187100  | -1.88975700 | 2.04680400  |
| C | 0.00440000  | -3.47513700 | -0.66420300 | C | 0.00521100  | -3.47412900 | -0.66316100 |
| N | 0.00174400  | -2.34045000 | -0.43970500 | N | 0.00218000  | -2.33907900 | -0.44025600 |
| C | 0.00672600  | -4.89991900 | -0.96165500 | C | 0.00819100  | -4.89921100 | -0.95907700 |
| H | -0.07786800 | -5.04257100 | -2.04459800 | H | -0.07532100 | -5.04313000 | -2.04195800 |
| H | 0.93926300  | -5.35592800 | -0.61371500 | H | 0.94050900  | -5.35460900 | -0.60972900 |
| H | -0.84015900 | -5.38963600 | -0.47014100 | H | -0.83906400 | -5.38861600 | -0.46786500 |

7

Charge=2 Multiplicity =5

|    |             |             |             |
|----|-------------|-------------|-------------|
| Fe | -0.16620100 | 0.28897000  | -0.56749900 |
| N  | -2.12692800 | -0.23599700 | -0.27211300 |
| N  | 1.72986100  | 0.99563700  | -0.18954100 |
| N  | 0.61306700  | -1.66833500 | -0.60085000 |
| C  | -2.52565100 | -0.25486700 | 1.02488100  |
| C  | -3.80839900 | -0.65672000 | 1.37748800  |
| H  | -4.10847000 | -0.67366700 | 2.42049100  |
| C  | -4.70102600 | -1.03046100 | 0.36828800  |
| H  | -5.70838400 | -1.34596500 | 0.62222900  |
| C  | -4.28426200 | -0.99720200 | -0.96280000 |
| H  | -4.95049700 | -1.27953200 | -1.77064300 |
| C  | -2.98352900 | -0.59664100 | -1.24741800 |
| H  | -2.59761200 | -0.55117400 | -2.26021300 |
| C  | 2.06034300  | 1.05976000  | 1.12225900  |
| C  | 3.35017100  | 1.38802300  | 1.52490700  |
| H  | 3.59998000  | 1.42816500  | 2.58046400  |
| C  | 4.31022400  | 1.67364500  | 0.55036200  |
| H  | 5.32243500  | 1.93506700  | 0.84342900  |
| C  | 3.95545600  | 1.61811300  | -0.79814000 |
| H  | 4.67384100  | 1.83601100  | -1.58087800 |
| C  | 2.65273600  | 1.26655400  | -1.13259200 |
| H  | 2.31628300  | 1.19311700  | -2.16134100 |
| C  | 0.82554100  | -2.22157500 | 0.60999900  |
| C  | 1.50725500  | -3.42740900 | 0.74970500  |
| H  | 1.67312100  | -3.85318700 | 1.73452300  |
| C  | 1.95958900  | -4.08115600 | -0.39779300 |
| H  | 2.49033400  | -5.02458700 | -0.31392700 |
| C  | 1.72194500  | -3.50989400 | -1.64958800 |
| H  | 2.05503300  | -3.99129700 | -2.56255900 |
| C  | 1.05168000  | -2.29446300 | -1.71145500 |
| H  | 0.85141500  | -1.78889600 | -2.65021000 |
| C  | -1.50372500 | 0.25507400  | 2.01732500  |
| H  | -1.66878900 | -0.15684200 | 3.01916400  |
| C  | 0.91774900  | 0.85436500  | 2.09241000  |
| H  | 0.44089000  | 1.82422200  | 2.26753700  |
| H  | 1.27395500  | 0.48854900  | 3.06134000  |
| C  | 0.18974600  | -1.51491200 | 1.78455100  |
| H  | -0.75602500 | -2.02087400 | 2.00711400  |
| H  | 0.81038600  | -1.60349500 | 2.68210600  |
| N  | -0.12342100 | -0.06253700 | 1.52145100  |
| O  | -0.17990200 | 0.43875800  | -2.17113300 |

|   |             |            |             |
|---|-------------|------------|-------------|
| H | -1.59137300 | 1.34319600 | 2.08746700  |
| C | -1.15980600 | 3.50805600 | -0.52182300 |
| N | -0.84116900 | 2.43286200 | -0.22575400 |
| C | -1.55955100 | 4.85808400 | -0.89389200 |
| H | -1.56682400 | 4.95085100 | -1.98513200 |
| H | -2.56277900 | 5.07140900 | -0.51104900 |
| H | -0.85528900 | 5.58598600 | -0.47827400 |

| <b>8</b>                 |             |             |             | <b>8</b>                 |             |             |             |
|--------------------------|-------------|-------------|-------------|--------------------------|-------------|-------------|-------------|
| Charge=2 Multiplicity =1 |             |             |             | Charge=2 Multiplicity =3 |             |             |             |
| N                        | -1.62978200 | -0.79839500 | -0.47509800 | N                        | -1.63115900 | -0.79625100 | -0.47361200 |
| N                        | 2.07708400  | 0.02379200  | 0.54750800  | N                        | 2.07686300  | 0.02448000  | 0.54945600  |
| N                        | -0.13762500 | 1.51776700  | -0.30645300 | N                        | -0.13752200 | 1.51834400  | -0.30770800 |
| C                        | -1.58133500 | -1.37798900 | -1.70084600 | C                        | -1.58253500 | -1.37497600 | -1.69997200 |
| C                        | 2.87547000  | -0.36969000 | -0.47473200 | C                        | 2.87488500  | -0.36848400 | -0.47351900 |
| C                        | 0.21297900  | 1.80212100  | -1.57754700 | C                        | 0.21305600  | 1.80322100  | -1.57879000 |
| C                        | -0.19046800 | -1.66175100 | -2.22664200 | C                        | -0.19198500 | -1.65924700 | -2.22736500 |
| H                        | -0.17016900 | -1.68287200 | -3.32204400 | H                        | -0.17344100 | -1.68006700 | -3.32278900 |
| C                        | 2.17100100  | -1.13086900 | -1.57599100 | C                        | 2.17111100  | -1.12917700 | -1.57604200 |
| H                        | 2.14440700  | -2.19389000 | -1.31611900 | H                        | 2.14417100  | -2.19232700 | -1.31679500 |
| H                        | 2.69812800  | -1.04294400 | -2.53259900 | H                        | 2.69964400  | -1.04075500 | -2.53181500 |
| C                        | 0.68592900  | 0.65047900  | -2.43327900 | C                        | 0.68664400  | 0.65218000  | -2.43482200 |
| H                        | 1.66844300  | 0.88001900  | -2.85809500 | H                        | 1.66948900  | 0.88196100  | -2.85873100 |
| N                        | 0.76087500  | -0.64746000 | -1.67755400 | N                        | 0.76111700  | -0.64587700 | -1.67971400 |
| H                        | 0.13408900  | -2.64689900 | -1.87688400 | H                        | 0.13242400  | -2.64472600 | -1.87846700 |
| C                        | 2.61114900  | 0.64594600  | 1.61493700  | C                        | 2.61159500  | 0.64520600  | 1.61720200  |
| C                        | 4.24491600  | -0.13104300 | -0.45489900 | C                        | 4.24445400  | -0.13040700 | -0.45365700 |
| C                        | 3.97548300  | 0.90272700  | 1.70271900  | C                        | 3.97607800  | 0.90137900  | 1.70501900  |
| H                        | 1.91374300  | 0.92509200  | 2.39658100  | H                        | 1.91470700  | 0.92411100  | 2.39943500  |
| C                        | 4.80442900  | 0.51251400  | 0.65157500  | C                        | 4.80456100  | 0.51182600  | 0.65329400  |
| H                        | 4.86416600  | -0.44704000 | -1.28848600 | H                        | 4.86343800  | -0.44591200 | -1.28763700 |
| H                        | 4.37205600  | 1.40322200  | 2.57932900  | H                        | 4.37307600  | 1.40080800  | 2.58203500  |
| H                        | 5.87186600  | 0.70683000  | 0.68817300  | H                        | 5.87210700  | 0.70555600  | 0.68982900  |
| H                        | -0.96233400 | 2.18784600  | 1.47529900  | H                        | -0.96191200 | 2.18650900  | 1.47473500  |
| C                        | -0.63596900 | 2.49240500  | 0.48694200  | C                        | -0.63637500 | 2.49197700  | 0.48648700  |
| C                        | -0.76470200 | 3.79914600  | 0.03469600  | C                        | -0.76576000 | 3.79883600  | 0.03457000  |
| C                        | -0.37568000 | 4.11045600  | -1.26838500 | C                        | -0.37687100 | 4.11106700  | -1.26829600 |
| H                        | -1.16718600 | 4.55494400  | 0.70015200  | H                        | -1.16864600 | 4.55402300  | 0.70046500  |
| C                        | 0.11138000  | 3.09385300  | -2.08768800 | C                        | 0.11077800  | 3.09516900  | -2.08813800 |
| H                        | -0.45976200 | 5.12487200  | -1.64577100 | H                        | -0.46146400 | 5.12564000  | -1.64514100 |
| H                        | 0.40540800  | 3.29569500  | -3.11322800 | H                        | 0.40477700  | 3.29762000  | -3.11357000 |
| H                        | -2.68104800 | -2.17537900 | -3.36670900 | H                        | -2.68237700 | -2.17138400 | -3.36621000 |
| C                        | -2.74232100 | -1.72034900 | -2.38310100 | C                        | -2.74361100 | -1.71711600 | -2.38223900 |
| C                        | -3.97876100 | -1.47193700 | -1.78145200 | C                        | -3.98008900 | -1.46970600 | -1.78022400 |



|    |             |             |             |    |             |             |             |
|----|-------------|-------------|-------------|----|-------------|-------------|-------------|
| C  | -4.01359900 | -0.87010300 | -0.52521900 | C  | -4.01499500 | -0.86903000 | -0.52346300 |
| H  | -4.89811500 | -1.73622600 | -2.29483300 | H  | -4.89939600 | -1.73402000 | -2.29367300 |
| C  | -2.81754200 | -0.53419700 | 0.10412600  | C  | -2.81887100 | -0.53321600 | 0.10587200  |
| H  | -4.95398600 | -0.65025500 | -0.03170900 | H  | -4.95537200 | -0.65015100 | -0.02951300 |
| H  | -2.79376600 | -0.02607600 | 1.06597100  | H  | -2.79523700 | -0.02613200 | 1.06830200  |
| H  | 0.00444000  | 0.53000100  | -3.28208200 | H  | 0.00575300  | 0.53204200  | -3.28414800 |
| N  | 0.42145500  | -2.23343500 | 0.80702600  | N  | 0.42263500  | -2.23642700 | 0.80080600  |
| C  | 0.49792200  | -3.26091500 | 1.33241100  | C  | 0.49902000  | -3.26483800 | 1.32452000  |
| C  | 0.59062000  | -4.54819100 | 2.00600000  | C  | 0.59074600  | -4.55277300 | 1.99688600  |
| H  | -0.12803200 | -5.25186700 | 1.57365800  | H  | -0.12906400 | -5.25523100 | 1.56448800  |
| H  | 1.60134400  | -4.95615700 | 1.90347300  | H  | 1.60091000  | -4.96187000 | 1.89334600  |
| H  | 0.36532500  | -4.41700700 | 3.06992300  | H  | 0.36635300  | -4.42215900 | 3.06109600  |
| Fe | 0.13167600  | -0.33067900 | 0.30324100  | Fe | 0.13156100  | -0.32999900 | 0.30335100  |
| O  | -0.32887500 | 0.00982400  | 1.82212200  | O  | -0.32749100 | 0.00724800  | 1.82011800  |
| H  | -1.95447400 | 0.57057100  | 4.00468300  | H  | -1.94976500 | 0.56459300  | 4.00610800  |
| C  | -2.83672200 | 1.21185700  | 3.96929700  | C  | -2.83173300 | 1.20649900  | 3.97468300  |
| O  | -3.00302600 | 1.59418300  | 2.59517100  | O  | -3.00211300 | 1.59222800  | 2.60204600  |
| H  | -2.67024400 | 2.08388600  | 4.61341100  | H  | -2.66286900 | 2.07689600  | 4.62039600  |
| H  | -3.70297200 | 0.65151900  | 4.34229400  | H  | -3.69717100 | 0.64574400  | 4.34895700  |
| H  | -3.77882000 | 2.17502000  | 2.54745600  | H  | -3.77804300 | 2.17317400  | 2.55823700  |

|                          |             |             |             |                          |             |             |             |
|--------------------------|-------------|-------------|-------------|--------------------------|-------------|-------------|-------------|
| <b>8</b>                 |             |             |             | <b>TS<sub>8,9</sub></b>  |             |             |             |
| Charge=2 Multiplicity =5 |             |             |             | Charge=2 Multiplicity =1 |             |             |             |
| N                        | -1.87345000 | -0.47621600 | -0.50345300 | Fe                       | 0.00253500  | -0.33790900 | 0.23199300  |
| N                        | 2.04322400  | -0.47734800 | 0.54791000  | N                        | -1.87393500 | -0.18605100 | -0.47723500 |
| N                        | 0.19233500  | 1.70428000  | -0.19545800 | N                        | 1.98425000  | -0.55620000 | 0.36648600  |
| C                        | -1.89878900 | -0.97415500 | -1.76554900 | N                        | 0.28879800  | 1.62169300  | 0.10126300  |
| C                        | 2.72027500  | -0.82424400 | -0.57249000 | C                        | -1.99830300 | -0.49575300 | -1.79436800 |
| C                        | 0.65160600  | 1.92861600  | -1.44289100 | C                        | 2.62456000  | -0.78120300 | -0.80496900 |
| C                        | -0.56071900 | -1.42601100 | -2.30904200 | C                        | 0.57487000  | 2.10789100  | -1.12487600 |
| H                        | -0.53638400 | -1.38826900 | -3.40398600 | C                        | -0.73000300 | -0.97403900 | -2.46147200 |
| C                        | 1.86091200  | -1.28030100 | -1.72974300 | H                        | -0.74585600 | -0.79391200 | -3.54262100 |
| H                        | 1.67500200  | -2.35318200 | -1.61608000 | C                        | 1.72062300  | -1.02471100 | -1.99208200 |
| H                        | 2.36840800  | -1.13845300 | -2.69001800 | H                        | 1.49233300  | -2.09452900 | -2.04387600 |
| C                        | 0.59084500  | 0.75717300  | -2.39798600 | H                        | 2.20650100  | -0.75275400 | -2.93569100 |
| H                        | 1.42933700  | 0.77772900  | -3.10141400 | C                        | 0.50893700  | 1.13166200  | -2.27140700 |
| N                        | 0.53221300  | -0.58676500 | -1.71429000 | H                        | 1.37030400  | 1.26221400  | -2.93478300 |
| H                        | -0.38340900 | -2.46280900 | -2.00933500 | N                        | 0.43013400  | -0.29603400 | -1.80984000 |
| C                        | 2.71544400  | -0.14984200 | 1.66797500  | O                        | -0.19830700 | -0.37154100 | 1.96656700  |
| C                        | 4.11029800  | -0.83811400 | -0.60000900 | H                        | -0.62172700 | -2.05199100 | -2.30940700 |
| C                        | 4.10492800  | -0.15803200 | 1.71345500  | C                        | 2.69610600  | -0.42298400 | 1.50041000  |
| H                        | 2.10627400  | 0.11803800  | 2.52458400  | C                        | 4.01139300  | -0.86068200 | -0.87129800 |
| C                        | 4.81207600  | -0.50217500 | 0.56078900  | C                        | 4.08467700  | -0.50765900 | 1.50762900  |

|    |             |             |             |   |             |             |             |
|----|-------------|-------------|-------------|---|-------------|-------------|-------------|
| H  | 4.63644100  | -1.11257100 | -1.50885600 | H | 2.11013600  | -0.25608600 | 2.39696400  |
| H  | 4.61676600  | 0.10586800  | 2.63244400  | C | 4.75390100  | -0.72273800 | 0.30340000  |
| H  | 5.89777600  | -0.50876800 | 0.56177800  | H | 4.50166000  | -1.03373100 | -1.82416900 |
| H  | -0.36386700 | 2.48026900  | 1.63918100  | H | 4.62458200  | -0.40082400 | 2.44217300  |
| C  | 0.06382500  | 2.72799000  | 0.67290400  | H | 5.83746000  | -0.78310600 | 0.27542300  |
| C  | 0.42349300  | 4.02447100  | 0.32198600  | H | 0.16126900  | 2.00304500  | 2.12193000  |
| C  | 0.93830600  | 4.25932700  | -0.95393400 | C | 0.34317100  | 2.45783100  | 1.15947300  |
| H  | 0.30595600  | 4.83005700  | 1.03854900  | C | 0.63871400  | 3.80754300  | 1.02796100  |
| C  | 1.04868700  | 3.19762200  | -1.85406200 | C | 0.91217100  | 4.31748500  | -0.24166300 |
| H  | 1.24197700  | 5.25851900  | -1.25106500 | H | 0.66359300  | 4.44024200  | 1.90848100  |
| H  | 1.42433300  | 3.35715400  | -2.86009700 | C | 0.88899400  | 3.44968800  | -1.33056800 |
| H  | -3.09095400 | -1.48445500 | -3.48216100 | H | 1.15154800  | 5.36721300  | -0.37982500 |
| C  | -3.09020400 | -1.09150700 | -2.47029100 | H | 1.11428200  | 3.80484900  | -2.33151800 |
| C  | -4.28053800 | -0.69638200 | -1.85227900 | H | -3.27885100 | -0.65962100 | -3.51135800 |
| C  | -4.23966500 | -0.17489800 | -0.55992900 | C | -3.21833200 | -0.41681200 | -2.45508800 |
| H  | -5.22387700 | -0.78405700 | -2.38266200 | C | -4.35407200 | -0.02884300 | -1.74124800 |
| C  | -3.01319600 | -0.06828400 | 0.09041000  | C | -4.22579800 | 0.26896900  | -0.38692500 |
| H  | -5.14253800 | 0.15583700  | -0.05824200 | H | -5.31739800 | 0.03867900  | -2.23711700 |
| H  | -2.91626500 | 0.37574000  | 1.07942500  | C | -2.97171800 | 0.18150100  | 0.21150500  |
| H  | -0.32128100 | 0.86391700  | -2.99530100 | H | -5.07929700 | 0.56993500  | 0.21074700  |
| N  | -0.06094500 | -2.58223400 | 0.59870900  | H | -2.84831600 | 0.38972700  | 1.26616200  |
| C  | -0.20873600 | -3.58800400 | 1.15667100  | H | -0.38015100 | 1.35132400  | -2.87179800 |
| C  | -0.39434800 | -4.85155600 | 1.85687500  | H | -1.01354300 | 0.27871900  | 2.71108600  |
| H  | -1.24142700 | -5.39660400 | 1.42807400  | C | -1.75912500 | 0.76877800  | 3.65169900  |
| H  | 0.50781500  | -5.46544600 | 1.76906800  | O | -3.07442100 | 0.39996700  | 3.47178600  |
| H  | -0.59353100 | -4.65882500 | 2.91627300  | H | -1.67053300 | 1.85354500  | 3.55453500  |
| Fe | 0.00145000  | -0.32505700 | 0.32034500  | H | -1.28363100 | 0.37373400  | 4.55547100  |
| O  | -0.37234900 | -0.05311100 | 1.86236400  | H | -3.24166000 | -0.45763000 | 3.89736900  |
| H  | -1.84553600 | 0.76071400  | 4.00272900  | N | -0.15991800 | -2.31450700 | 0.28218100  |
| C  | -2.57209700 | 1.57455500  | 3.97254000  | C | -0.26788200 | -3.43614500 | 0.54233400  |
| O  | -2.63637500 | 2.00916300  | 2.60553600  | C | -0.40202900 | -4.84566700 | 0.88425000  |
| H  | -2.23373100 | 2.37905500  | 4.63704600  | H | -1.40146600 | -5.20426700 | 0.61796000  |
| H  | -3.54151000 | 1.20255600  | 4.32687700  | H | 0.34588000  | -5.43831000 | 0.34780300  |
| H  | -3.27173800 | 2.74154300  | 2.56467900  | H | -0.25163700 | -4.97522000 | 1.96124600  |

|                          |             |             |             |                          |             |             |             |
|--------------------------|-------------|-------------|-------------|--------------------------|-------------|-------------|-------------|
| <b>TS<sub>8-9</sub></b>  |             |             |             | <b>TS<sub>8-9</sub></b>  |             |             |             |
| Charge=2 Multiplicity =3 |             |             |             | Charge=2 Multiplicity =5 |             |             |             |
| Fe                       | -0.00006300 | -0.33086900 | 0.24298400  | Fe                       | 0.13233600  | 0.31772900  | 0.31777900  |
| N                        | -1.88383900 | -0.19509100 | -0.45513100 | N                        | 1.97680700  | -0.26906600 | -0.59047900 |
| N                        | 1.97819300  | -0.54939900 | 0.38344000  | N                        | -1.87855200 | 0.99980700  | 0.26534300  |
| N                        | 0.29412400  | 1.62254500  | 0.04618500  | N                        | -0.66988000 | -1.66157700 | 0.45935700  |
| C                        | -2.01773100 | -0.55089100 | -1.75957500 | C                        | 2.00307200  | -0.31364600 | -1.94303500 |
| C                        | 2.61157900  | -0.81327800 | -0.78392500 | C                        | -2.48677200 | 1.01426800  | -0.94134300 |

|   |             |             |             |   |             |             |             |
|---|-------------|-------------|-------------|---|-------------|-------------|-------------|
| C | 0.57820900  | 2.06433400  | -1.19742000 | C | -1.15950200 | -2.21639100 | -0.66660600 |
| C | -0.75464800 | -1.05422200 | -2.42086500 | C | 0.76586700  | 0.20992500  | -2.64480200 |
| H | -0.77845700 | -0.90712500 | -3.50685300 | H | 0.69301400  | -0.19267600 | -3.66290800 |
| C | 1.70241700  | -1.09366500 | -1.96038800 | C | -1.59122800 | 0.80302300  | -2.14604800 |
| H | 1.47338000  | -2.16436900 | -1.97670000 | H | -1.17932000 | 1.77638500  | -2.43411500 |
| H | 2.18654500  | -0.85303300 | -2.91337600 | H | -2.17280200 | 0.43838700  | -3.00171300 |
| C | 0.49007600  | 1.05161200  | -2.30952100 | C | -0.80594300 | -1.54186900 | -1.97449200 |
| H | 1.34033300  | 1.15594300  | -2.99161400 | H | -1.61572700 | -1.66853200 | -2.70264900 |
| N | 0.41234900  | -0.35925300 | -1.79950500 | N | -0.44804700 | -0.09774100 | -1.84087100 |
| O | -0.23716300 | -0.33879300 | 1.96895600  | O | 0.51785600  | 0.45880100  | 1.96549500  |
| H | -0.64762200 | -2.12720000 | -2.23709200 | H | 0.84443800  | 1.29845800  | -2.73054800 |
| C | 2.69614800  | -0.38592900 | 1.50929300  | C | -2.59182600 | 1.27219900  | 1.37554900  |
| C | 3.99787600  | -0.89975700 | -0.85434900 | C | -3.84494700 | 1.29445700  | -1.06419200 |
| C | 4.08445600  | -0.47527400 | 1.51263400  | C | -3.94735200 | 1.57639600  | 1.32512700  |
| H | 2.11633200  | -0.19345500 | 2.40459500  | H | -2.04285600 | 1.23630900  | 2.31044500  |
| C | 4.74672300  | -0.72852400 | 0.31193800  | C | -4.58488600 | 1.58254700  | 0.08414900  |
| H | 4.48307500  | -1.10417900 | -1.80361000 | H | -4.31525500 | 1.29322600  | -2.04260000 |
| H | 4.62953900  | -0.34328600 | 2.44094100  | H | -4.48828300 | 1.79513000  | 2.23934500  |
| H | 5.82990600  | -0.79370400 | 0.28044900  | H | -5.64478200 | 1.80570000  | 0.00898600  |
| H | 0.17938200  | 2.07917000  | 2.05387300  | H | -0.44878800 | -1.77591800 | 2.50643500  |
| C | 0.36418100  | 2.49424200  | 1.07449500  | C | -0.86102300 | -2.28226700 | 1.64152800  |
| C | 0.67437500  | 3.83513400  | 0.89583600  | C | -1.54786400 | -3.48473000 | 1.74386800  |
| C | 0.94654200  | 4.29862600  | -0.39170500 | C | -2.07150200 | -4.05581800 | 0.58256100  |
| H | 0.71101400  | 4.49682200  | 1.75434900  | H | -1.67535200 | -3.95623100 | 2.71219300  |
| C | 0.90653200  | 3.39463100  | -1.45012600 | C | -1.87648900 | -3.41130300 | -0.63846800 |
| H | 1.19719500  | 5.34018400  | -0.56669400 | H | -2.62414900 | -4.98933200 | 0.62620600  |
| H | 1.12942700  | 3.71279300  | -2.46396000 | H | -2.26695900 | -3.83414500 | -1.55906200 |
| H | -3.31142500 | -0.77337500 | -3.46060500 | H | 3.11768200  | -0.79853400 | -3.71880100 |
| C | -3.24248000 | -0.49359300 | -2.41401500 | C | 3.12411200  | -0.76327000 | -2.63380900 |
| C | -4.37235500 | -0.07874700 | -1.70588500 | C | 4.25038900  | -1.16344600 | -1.91091600 |
| C | -4.23405100 | 0.26681000  | -0.36386200 | C | 4.22068800  | -1.10370900 | -0.51802200 |
| H | -5.33917200 | -0.02723000 | -2.19687300 | H | 5.13483500  | -1.51935900 | -2.43045700 |
| C | -2.97569400 | 0.19793900  | 0.22815500  | C | 3.06334600  | -0.65228300 | 0.10840300  |
| H | -5.08308400 | 0.59056100  | 0.22826400  | H | 5.07428400  | -1.40661700 | 0.07860500  |
| H | -2.84230700 | 0.44326800  | 1.27407600  | H | 2.99246100  | -0.58337000 | 1.18996700  |
| H | -0.40858900 | 1.25567200  | -2.90106300 | H | 0.06424000  | -2.06588300 | -2.38594500 |
| H | -0.95642400 | 0.36370200  | 2.68312000  | H | 1.23243200  | 0.42989900  | 3.12638800  |
| C | -1.69032700 | 0.93348200  | 3.65071600  | C | 1.99189500  | 0.23695800  | 4.07197200  |
| O | -3.01143900 | 0.58196600  | 3.49383800  | O | 3.27557100  | 0.09534600  | 3.58975300  |
| H | -1.57866900 | 2.01030000  | 3.50687500  | H | 1.64697300  | -0.71602500 | 4.48185600  |
| H | -1.20800200 | 0.55624300  | 4.55779300  | H | 1.84317000  | 1.07956100  | 4.75569400  |
| H | -3.19062400 | -0.25601000 | 3.95245900  | H | 3.73424700  | 0.95194400  | 3.60462600  |
| N | -0.16278000 | -2.30809900 | 0.33502200  | N | 0.67455800  | 2.42724800  | -0.24367800 |
| C | -0.27440200 | -3.42427300 | 0.61618200  | C | 0.97985300  | 3.54513600  | -0.22279800 |

|   |             |             |            |   |            |            |             |
|---|-------------|-------------|------------|---|------------|------------|-------------|
| C | -0.41406000 | -4.82629800 | 0.98561200 | C | 1.36151500 | 4.95097800 | -0.20167600 |
| H | -1.43057800 | -5.17192300 | 0.77197200 | H | 2.41920500 | 5.05570100 | -0.46400800 |
| H | 0.29818900  | -5.43919700 | 0.42399700 | H | 0.75800100 | 5.51425700 | -0.92075200 |
| H | -0.21541800 | -4.94244100 | 2.05631400 | H | 1.19853900 | 5.36389500 | 0.79917500  |

|                          |             |             |             |                          |             |             |             |
|--------------------------|-------------|-------------|-------------|--------------------------|-------------|-------------|-------------|
| <b>9</b>                 |             |             |             | <b>9</b>                 |             |             |             |
| Charge=2 Multiplicity =1 |             |             |             | Charge=2 Multiplicity =3 |             |             |             |
| Fe                       | 0.07902600  | -0.34687300 | 0.31743500  | Fe                       | 0.07888000  | -0.34691300 | 0.31746900  |
| N                        | -1.78215700 | -0.75098600 | -0.30307300 | N                        | -1.78232300 | -0.75073600 | -0.30315300 |
| N                        | 2.04883900  | -0.14051000 | 0.46132400  | N                        | 2.04872000  | -0.14085700 | 0.46141700  |
| N                        | -0.02621200 | 1.51105700  | -0.36399600 | N                        | -0.02605800 | 1.51106300  | -0.36390300 |
| C                        | -1.82945600 | -1.47162000 | -1.45307500 | C                        | -1.82973400 | -1.47136900 | -1.45313700 |
| C                        | 2.74714300  | -0.56545000 | -0.61779000 | C                        | 2.74698300  | -0.56587600 | -0.61769500 |
| C                        | 0.20395500  | 1.66487100  | -1.68598600 | C                        | 0.20417200  | 1.66486300  | -1.68588600 |
| C                        | -0.48116400 | -1.87066100 | -2.01076900 | C                        | -0.48148600 | -1.87058000 | -2.01084500 |
| H                        | -0.51686100 | -2.02129600 | -3.09580700 | H                        | -0.51720700 | -2.02117400 | -3.09588900 |
| C                        | 1.93150900  | -1.30164200 | -1.65836500 | C                        | 1.93127800  | -1.30189400 | -1.65835300 |
| H                        | 1.92088200  | -2.36701600 | -1.40517900 | H                        | 1.92050700  | -2.36728500 | -1.40524300 |
| H                        | 2.37027700  | -1.21246100 | -2.65803600 | H                        | 2.37010400  | -1.21270400 | -2.65799800 |
| C                        | 0.31366600  | 0.39946100  | -2.49725400 | C                        | 0.31368300  | 0.39945700  | -2.49721000 |
| H                        | 1.12241600  | 0.47783400  | -3.23084000 | H                        | 1.12244400  | 0.47774800  | -3.23079200 |
| N                        | 0.51556200  | -0.81863600 | -1.63755900 | N                        | 0.51539500  | -0.81871200 | -1.63757900 |
| O                        | -0.23195800 | 0.09077600  | 2.01526400  | O                        | -0.23223300 | 0.09084900  | 2.01528700  |
| H                        | -0.16222500 | -2.81307400 | -1.55618500 | H                        | -0.16268200 | -2.81305600 | -1.55629600 |
| C                        | 2.69250800  | 0.43342200  | 1.49363700  | C                        | 2.69245900  | 0.43293200  | 1.49376700  |
| C                        | 4.12587300  | -0.40367900 | -0.69833300 | C                        | 4.12574300  | -0.40432800 | -0.69819000 |
| C                        | 4.07259800  | 0.61009700  | 1.48488600  | C                        | 4.07257600  | 0.60938400  | 1.48506000  |
| H                        | 2.06283400  | 0.73158800  | 2.32434800  | H                        | 2.06281000  | 0.73116500  | 2.32447400  |
| C                        | 4.79928500  | 0.19312400  | 0.37008600  | C                        | 4.79922600  | 0.19232500  | 0.37026600  |
| H                        | 4.66482000  | -0.74482700 | -1.57665100 | H                        | 4.66465800  | -0.74553200 | -1.57650600 |
| H                        | 4.56090900  | 1.07060900  | 2.33678800  | H                        | 4.56094100  | 1.06978500  | 2.33699100  |
| H                        | 5.87581700  | 0.32733700  | 0.33012900  | H                        | 5.87578000  | 0.32636200  | 0.33034400  |
| H                        | -0.29937100 | 2.44931400  | 1.46432200  | H                        | -0.29910000 | 2.44932400  | 1.46444600  |
| C                        | -0.15624100 | 2.61322600  | 0.40520100  | C                        | -0.15593300 | 2.61323700  | 0.40531500  |
| C                        | -0.09525700 | 3.89707500  | -0.12007800 | C                        | -0.09468700 | 3.89708700  | -0.11992700 |
| C                        | 0.13336000  | 4.05839200  | -1.48650800 | C                        | 0.13399000  | 4.05839600  | -1.48634700 |
| H                        | -0.21451100 | 4.74906100  | 0.54020000  | H                        | -0.21379300 | 4.74907700  | 0.54037400  |
| C                        | 0.29176200  | 2.92256800  | -2.27768500 | C                        | 0.29220000  | 2.92256300  | -2.27754900 |
| H                        | 0.19639000  | 5.04844800  | -1.92717200 | H                        | 0.19720900  | 5.04845300  | -1.92698100 |
| H                        | 0.48188500  | 3.00738000  | -3.34321400 | H                        | 0.48234000  | 3.00736700  | -3.34307500 |
| H                        | -3.04108000 | -2.40952600 | -2.96067400 | H                        | -3.04156500 | -2.40908700 | -2.96069200 |
| C                        | -3.03585800 | -1.84360400 | -2.03440100 | C                        | -3.03621900 | -1.84314900 | -2.03443100 |
| C                        | -4.23005600 | -1.48371900 | -1.40603200 | C                        | -4.23034500 | -1.48303100 | -1.40604300 |
| C                        | -4.17510000 | -0.75516700 | -0.21960400 | C                        | -4.17525100 | -0.75444500 | -0.21963300 |

|   |             |             |             |   |             |             |             |
|---|-------------|-------------|-------------|---|-------------|-------------|-------------|
| H | -5.18414200 | -1.76606600 | -1.84012600 | H | -5.18448800 | -1.76521600 | -1.84011600 |
| C | -2.93369900 | -0.40296800 | 0.30245200  | C | -2.93376600 | -0.40249800 | 0.30237900  |
| H | -5.07803600 | -0.45529900 | 0.30098300  | H | -5.07812500 | -0.45438400 | 0.30095100  |
| H | -2.85211600 | 0.16525100  | 1.22231000  | H | -2.85184100 | 0.16575500  | 1.22218400  |
| H | -0.61204800 | 0.26799300  | -3.06731400 | H | -0.61204800 | 0.26815700  | -3.06727900 |
| H | -0.97215000 | 0.70684100  | 2.18637500  | H | -0.97224500 | 0.70715400  | 2.18631700  |
| C | -2.74919600 | 3.00635200  | 2.91302600  | C | -2.74782900 | 3.00681700  | 2.91239300  |
| O | -2.48612500 | 1.64995600  | 2.99530200  | O | -2.48486900 | 1.65047100  | 2.99484800  |
| H | -3.07623800 | 3.31426500  | 1.92734300  | H | -3.07496500 | 3.31461800  | 1.92671400  |
| H | -3.12303500 | 3.50238900  | 3.80207900  | H | -3.12088600 | 3.50336700  | 3.80148400  |
| H | -2.42662300 | 1.38602600  | 3.92847900  | H | -2.42513900 | 1.38663800  | 3.92804400  |
| N | 0.30216800  | -2.20789200 | 0.96031400  | N | 0.30168600  | -2.20799600 | 0.96032100  |
| C | 0.38741500  | -3.18388800 | 1.57464700  | C | 0.38675500  | -3.18402600 | 1.57462300  |
| C | 0.49210000  | -4.40455100 | 2.36177900  | C | 0.49121800  | -4.40472200 | 2.36173500  |
| H | -0.25927800 | -5.13052500 | 2.03509600  | H | -0.26027900 | -5.13056300 | 2.03503000  |
| H | 1.48864400  | -4.84317600 | 2.24861600  | H | 1.48768900  | -4.84351800 | 2.24858100  |
| H | 0.32453500  | -4.16930000 | 3.41822900  | H | 0.32367700  | -4.16945700 | 3.41818600  |

| <b>9</b>                 |             |             |             | <b>10</b>                |             |             |             |
|--------------------------|-------------|-------------|-------------|--------------------------|-------------|-------------|-------------|
| Charge=2 Multiplicity =5 |             |             |             | Charge=2 Multiplicity =1 |             |             |             |
| Fe                       | 0.10381000  | 0.23481400  | 0.26183300  | N                        | 1.71699200  | 0.87442300  | -0.13886300 |
| N                        | 2.00379600  | 0.08119000  | -0.41544900 | N                        | -2.09002300 | -0.23285800 | 0.14097500  |
| N                        | -1.78160500 | 0.89435300  | 0.51033000  | N                        | 0.52624200  | -1.55618200 | 0.08287500  |
| N                        | -0.66666900 | -1.74068200 | -0.14865200 | C                        | 1.94557900  | 1.12591000  | -1.45159500 |
| C                        | 2.14665700  | 0.48913400  | -1.70590000 | C                        | -2.64562000 | -0.02065000 | -1.07987100 |
| C                        | -2.40643200 | 1.25657000  | -0.63428100 | C                        | 0.53497800  | -2.05683400 | -1.17281500 |
| C                        | -1.06319500 | -1.89918100 | -1.42595100 | C                        | 0.71112300  | 1.13892500  | -2.32653600 |
| C                        | 0.91922700  | 1.10741900  | -2.33487300 | H                        | 0.95253300  | 0.89854000  | -3.36797000 |
| H                        | 0.92772700  | 1.00775900  | -3.42604500 | C                        | -1.72298600 | 0.62756800  | -2.08850500 |
| C                        | -1.52060100 | 1.37124300  | -1.85495900 | H                        | -1.77991000 | 1.71547600  | -1.99828900 |
| H                        | -1.16562100 | 2.40448000  | -1.92224000 | H                        | -2.00030400 | 0.36872700  | -3.11721900 |
| H                        | -2.07525700 | 1.16056000  | -2.77504900 | C                        | -0.11911400 | -1.20833400 | -2.23000100 |
| C                        | -0.53203900 | -0.86405200 | -2.38725400 | H                        | -1.09959000 | -1.63496100 | -2.46549600 |
| H                        | -1.17806300 | -0.75448900 | -3.26447100 | N                        | -0.32236800 | 0.20988600  | -1.77328600 |
| N                        | -0.31142100 | 0.48321500  | -1.74486300 | H                        | 0.28349100  | 2.14678800  | -2.31985600 |
| O                        | 0.28887800  | -0.04645900 | 2.00037100  | C                        | -2.85642400 | -0.78013800 | 1.10179700  |
| H                        | 0.90141800  | 2.17350100  | -2.09413100 | C                        | -3.96583300 | -0.35326600 | -1.36277800 |
| C                        | -2.45826400 | 0.86833300  | 1.67269400  | C                        | -4.18808300 | -1.12902100 | 0.89813700  |
| C                        | -3.75533300 | 1.59452300  | -0.64298400 | H                        | -2.38168500 | -0.93625400 | 2.06311200  |
| C                        | -3.80433200 | 1.21115700  | 1.73728300  | C                        | -4.75537800 | -0.91236300 | -0.35607700 |
| H                        | -1.87972100 | 0.55697100  | 2.53615700  | H                        | -4.36993900 | -0.17768200 | -2.35493200 |
| C                        | -4.46310800 | 1.57256600  | 0.56144300  | H                        | -4.76083800 | -1.56655000 | 1.70862800  |
| H                        | -4.24341500 | 1.87712200  | -1.57043400 | H                        | -5.78921300 | -1.17891000 | -0.55193200 |

|   |             |             |             |    |             |             |             |
|---|-------------|-------------|-------------|----|-------------|-------------|-------------|
| H | -4.32330400 | 1.18533500  | 2.68920700  | H  | 1.16884300  | -1.84876900 | 2.03925900  |
| H | -5.51677800 | 1.83399400  | 0.57796400  | C  | 1.10844000  | -2.29235900 | 1.05538300  |
| H | -0.66524000 | -2.47109400 | 1.78275800  | C  | 1.65957500  | -3.54720600 | 0.82789100  |
| C | -1.00043500 | -2.66604000 | 0.76932300  | C  | 1.64018100  | -4.06960800 | -0.46436800 |
| C | -1.73601700 | -3.79937000 | 0.43638400  | H  | 2.10635600  | -4.09222400 | 1.65228400  |
| C | -2.15760800 | -3.96161700 | -0.88386100 | C  | 1.07969700  | -3.30114900 | -1.48130800 |
| H | -1.97997200 | -4.53056600 | 1.19941200  | H  | 2.06531800  | -5.04495400 | -0.67915500 |
| C | -1.81970000 | -2.99386100 | -1.83291100 | H  | 1.06375200  | -3.65933900 | -2.50614400 |
| H | -2.74418000 | -4.82812300 | -1.17346800 | H  | 3.36712100  | 1.59776300  | -2.99600000 |
| H | -2.13169200 | -3.09447600 | -2.86778600 | C  | 3.21773300  | 1.40989900  | -1.93729200 |
| H | 3.45048400  | 0.72902600  | -3.39766900 | C  | 4.29086700  | 1.45008600  | -1.04545800 |
| C | 3.36716500  | 0.40433000  | -2.36532500 | C  | 4.05522800  | 1.18881900  | 0.30328900  |
| C | 4.47655400  | -0.09595200 | -1.68011600 | H  | 5.29197100  | 1.67278200  | -1.40110700 |
| C | 4.32761300  | -0.50123600 | -0.35496000 | C  | 2.75862100  | 0.89556400  | 0.71458500  |
| H | 5.43899500  | -0.16928000 | -2.17710000 | H  | 4.86178900  | 1.19846300  | 1.02843000  |
| C | 3.07660500  | -0.40149500 | 0.24445500  | H  | 2.53495100  | 0.65034200  | 1.74761100  |
| H | 5.16331000  | -0.89532800 | 0.21288600  | H  | 0.45874200  | -1.22632200 | -3.16014900 |
| H | 2.92383600  | -0.71384100 | 1.27148300  | N  | -0.70371900 | 2.18287000  | 0.31248300  |
| H | 0.44185300  | -1.21097400 | -2.74978400 | C  | -1.01238400 | 3.29424000  | 0.44438800  |
| H | 1.07717600  | -0.52106100 | 2.33840600  | C  | -1.40596900 | 4.69031800  | 0.59775900  |
| C | 2.02993600  | -2.92635100 | 3.37678000  | H  | -0.54451400 | 5.29640500  | 0.89685000  |
| O | 2.34859900  | -1.58267500 | 3.28812800  | H  | -1.79484200 | 5.07650000  | -0.35042600 |
| H | 2.15162900  | -3.45157100 | 2.43722400  | H  | -2.18779100 | 4.77993800  | 1.35917800  |
| H | 2.21371300  | -3.42716700 | 4.32103400  | H  | 0.04541000  | 1.49691600  | 2.52264700  |
| H | 2.44208300  | -1.20943900 | 4.18035800  | O  | -0.13590700 | 0.56340900  | 2.32872800  |
| N | 0.61718800  | 2.60904700  | 0.39385500  | Fe | -0.16258600 | 0.32050700  | 0.21589900  |
| C | 0.87184600  | 3.60772500  | 0.92639400  | C  | 0.03414600  | -0.21320300 | 3.53842100  |
| C | 1.18984400  | 4.86422400  | 1.59379700  | O  | 1.37568700  | -0.44629500 | 3.81062700  |
| H | 2.23291000  | 5.13661500  | 1.40434000  | H  | -0.45666800 | -1.16312600 | 3.32610700  |
| H | 0.54036500  | 5.66246800  | 1.22061400  | H  | -0.48105400 | 0.30315300  | 4.35414800  |
| H | 1.03953200  | 4.75920400  | 2.67307500  | H  | 1.67894200  | 0.08703400  | 4.56264000  |

|           |                                 |             |             |           |                                 |             |             |
|-----------|---------------------------------|-------------|-------------|-----------|---------------------------------|-------------|-------------|
| <b>10</b> | <b>Charge=2 Multiplicity =3</b> |             |             | <b>10</b> | <b>Charge=2 Multiplicity =5</b> |             |             |
| N         | -0.09553500                     | -0.06948200 | -0.09461700 | N         | -0.10626800                     | -0.02178800 | -0.10862800 |
| N         | -0.05235800                     | -0.04583900 | 3.94178800  | N         | -0.15198100                     | 0.00704100  | 4.13417300  |
| N         | 1.93286100                      | 0.11789100  | 1.76768700  | N         | 2.15189100                      | 0.24290800  | 1.67608100  |
| C         | -0.21259000                     | -1.37563500 | -0.43404900 | C         | -0.07531200                     | -1.34368400 | -0.38112800 |
| C         | -0.32240400                     | -1.32287300 | 4.30689100  | C         | -0.39949300                     | -1.29136500 | 4.42038900  |
| C         | 2.46748700                      | -1.12135200 | 1.83725300  | C         | 2.58374400                      | -1.03526200 | 1.74243200  |
| C         | -0.51059100                     | -2.35289900 | 0.69191700  | C         | -0.30216800                     | -2.29133100 | 0.78380300  |
| H         | -0.19760400                     | -3.36577600 | 0.40641600  | H         | 0.13435600                      | -3.27416000 | 0.56353600  |
| C         | -0.66721500                     | -2.28138600 | 3.18129300  | C         | -0.62425400                     | -2.20267400 | 3.22987400  |
| H         | -1.73372900                     | -2.19056300 | 2.94807500  | H         | -1.67802700                     | -2.14540900 | 2.93496000  |

|    |             |             |             |    |             |             |             |
|----|-------------|-------------|-------------|----|-------------|-------------|-------------|
| H  | -0.49464800 | -3.31963400 | 3.49468500  | H  | -0.42209700 | -3.24759400 | 3.50163600  |
| C  | 1.53136700  | -2.28348300 | 2.09732600  | C  | 1.63133000  | -2.06297000 | 2.31688800  |
| H  | 1.71250400  | -2.65428800 | 3.11259500  | H  | 1.78541600  | -2.08970100 | 3.40157700  |
| N  | 0.09849300  | -1.92387800 | 1.96849400  | N  | 0.19472200  | -1.75819300 | 2.07644200  |
| H  | -1.59675300 | -2.38870900 | 0.83481300  | H  | -1.38302300 | -2.44528100 | 0.88156600  |
| C  | 0.21472400  | 0.86031900  | 4.90199600  | C  | 0.00765000  | 0.87498700  | 5.15191300  |
| C  | -0.31884600 | -1.71840100 | 5.64150100  | C  | -0.48396800 | -1.75266700 | 5.73170000  |
| C  | 0.22774200  | 0.53746700  | 6.25507700  | C  | -0.07104000 | 0.49199000  | 6.48661300  |
| H  | 0.41059200  | 1.87014400  | 4.56092000  | H  | 0.19770000  | 1.90575500  | 4.87263300  |
| C  | -0.04281100 | -0.77625600 | 6.63341900  | C  | -0.32101200 | -0.84787200 | 6.78174500  |
| H  | -0.53039700 | -2.75159700 | 5.89900100  | H  | -0.67388600 | -2.80347200 | 5.92734200  |
| H  | 0.45020500  | 1.30336300  | 6.99010700  | H  | 0.06644100  | 1.22744200  | 7.27182600  |
| H  | -0.03516300 | -1.06588000 | 7.67961100  | H  | -0.38214100 | -1.18616000 | 7.81158600  |
| H  | 2.28760300  | 2.12494600  | 1.37601800  | H  | 2.61434100  | 2.18554500  | 1.10736400  |
| C  | 2.75712300  | 1.15884000  | 1.51043300  | C  | 3.00467200  | 1.17918200  | 1.21029900  |
| C  | 4.12945200  | 1.01459800  | 1.36462200  | C  | 4.31201700  | 0.89449100  | 0.83290400  |
| C  | 4.68598700  | -0.26041500 | 1.46839600  | C  | 4.75920500  | -0.42330400 | 0.91746500  |
| H  | 4.74378700  | 1.88510600  | 1.16211800  | H  | 4.95631400  | 1.68872400  | 0.47165300  |
| C  | 3.83739900  | -1.34013400 | 1.69398600  | C  | 3.87567800  | -1.40248200 | 1.36800700  |
| H  | 5.75519200  | -0.41257700 | 1.35896100  | H  | 5.77141200  | -0.68716300 | 0.62671600  |
| H  | 4.22893400  | -2.35104900 | 1.75637900  | H  | 4.18476100  | -2.44127100 | 1.43205500  |
| H  | -0.22471100 | -2.84321200 | -2.00441600 | H  | 0.10452100  | -2.88756600 | -1.87168100 |
| C  | -0.13569500 | -1.78889800 | -1.76133500 | C  | 0.07554300  | -1.81888400 | -1.68260100 |
| C  | 0.05147200  | -0.83803400 | -2.76508700 | C  | 0.18255100  | -0.90601500 | -2.73202200 |
| C  | 0.16612000  | 0.50479700  | -2.40886700 | C  | 0.14966800  | 0.45926000  | -2.44767000 |
| H  | 0.11163200  | -1.14329200 | -3.80513400 | H  | 0.29732100  | -1.25622700 | -3.75327600 |
| C  | 0.09464100  | 0.84943700  | -1.06323000 | C  | 0.01358800  | 0.85704300  | -1.12242700 |
| H  | 0.31754400  | 1.27672900  | -3.15550000 | H  | 0.23809800  | 1.20232300  | -3.23275500 |
| H  | 0.20328600  | 1.87984700  | -0.73687800 | H  | 0.01792800  | 1.90805700  | -0.84799800 |
| H  | 1.78070600  | -3.11271400 | 1.42374200  | H  | 1.88189400  | -3.06360500 | 1.94192000  |
| N  | -1.95923100 | 0.51538200  | 1.94048400  | N  | -2.23381100 | 0.72494200  | 1.92685800  |
| C  | -3.11293600 | 0.64134200  | 1.94137800  | C  | -3.39199900 | 0.75861400  | 1.86067200  |
| C  | -4.56243600 | 0.79591600  | 1.94384100  | C  | -4.84665300 | 0.80474900  | 1.77750700  |
| H  | -4.89324100 | 1.26276400  | 1.01020000  | H  | -5.15507700 | 1.51007900  | 0.99898800  |
| H  | -5.04345600 | -0.18352200 | 2.03734300  | H  | -5.23986100 | -0.18702900 | 1.53167600  |
| H  | -4.87348100 | 1.42186100  | 2.78676400  | H  | -5.26620600 | 1.12565400  | 2.73648600  |
| H  | -1.15801400 | 2.85403700  | 2.02558700  | H  | -1.11752000 | 2.92110200  | 2.24784300  |
| O  | -0.23985000 | 2.69095800  | 2.29655400  | O  | -0.20219200 | 2.62966200  | 2.39523700  |
| Fe | -0.04343200 | 0.30422600  | 1.90519100  | Fe | -0.00473200 | 0.47373300  | 2.00733900  |
| C  | 0.52118600  | 3.85930000  | 2.01335600  | C  | 0.71502800  | 3.73288200  | 2.19759600  |
| O  | 0.82856300  | 3.83937400  | 0.64040600  | O  | 1.01891400  | 3.90190700  | 0.85212600  |
| H  | 1.41970400  | 3.78183500  | 2.63496700  | H  | 1.61831200  | 3.43023500  | 2.72735300  |
| H  | -0.04488500 | 4.75576300  | 2.29295800  | H  | 0.28908300  | 4.63053800  | 2.65524900  |
| H  | 0.99236400  | 4.74274200  | 0.32164000  | H  | 0.55528000  | 4.67149500  | 0.48523600  |

| TS <sub>10-11</sub>      |             |             |             | TS <sub>10-11</sub>      |             |             |             |
|--------------------------|-------------|-------------|-------------|--------------------------|-------------|-------------|-------------|
| Charge=2 Multiplicity =1 |             |             |             | Charge=2 Multiplicity =3 |             |             |             |
| N                        | 0.03888000  | 0.07281500  | 0.06341900  | N                        | 2.04447800  | -0.27310000 | -0.29417200 |
| N                        | 0.04731600  | 0.08311800  | 4.03410100  | N                        | -1.93873800 | 0.78650200  | -0.08937000 |
| N                        | 2.03274100  | -0.05424200 | 2.16111600  | N                        | -0.49118500 | -1.48185900 | 0.66833300  |
| C                        | -0.44844600 | -1.13640700 | -0.31738900 | C                        | 2.26387200  | -0.45492400 | -1.61554600 |
| C                        | -0.28013100 | -1.17219500 | 4.42584200  | C                        | -2.38525400 | 0.60781900  | -1.35136700 |
| C                        | 2.37510500  | -1.36034600 | 2.15547900  | C                        | -0.74652500 | -2.32511600 | -0.35756700 |
| C                        | -0.92228200 | -2.01526200 | 0.82047300  | C                        | 1.10688100  | -0.11458900 | -2.53727600 |
| H                        | -0.87218700 | -3.07861100 | 0.55726500  | H                        | 1.20571100  | -0.65219300 | -3.49013800 |
| C                        | -0.75596800 | -2.08234100 | 3.31401900  | C                        | -1.32755100 | 0.35224400  | -2.41076600 |
| H                        | -1.83456700 | -1.94620100 | 3.18464000  | H                        | -0.95588500 | 1.32075800  | -2.76439800 |
| H                        | -0.59129700 | -3.13824300 | 3.55742600  | H                        | -1.77230000 | -0.15150000 | -3.27945000 |
| C                        | 1.25897300  | -2.33485800 | 1.88296000  | C                        | -0.42800000 | -1.85776100 | -1.76224000 |
| H                        | 1.33835400  | -3.21228400 | 2.53346500  | H                        | -1.23518200 | -2.15743600 | -2.44213300 |
| N                        | -0.09818500 | -1.70281100 | 2.02698800  | N                        | -0.17792700 | -0.39807400 | -1.86457600 |
| H                        | -1.96512900 | -1.78542400 | 1.05538800  | H                        | 1.13760600  | 0.95541900  | -2.76944700 |
| C                        | 0.41241900  | 0.97862200  | 4.96876000  | C                        | -2.82307800 | 1.08758200  | 0.87945000  |
| C                        | -0.24318500 | -1.56069400 | 5.76114400  | C                        | -3.73659500 | 0.72155300  | -1.67122100 |
| C                        | 0.45733200  | 0.66795000  | 6.32438800  | C                        | -4.18411900 | 1.23277600  | 0.63346800  |
| H                        | 0.67453100  | 1.96278700  | 4.59669800  | H                        | -2.41293400 | 1.20697000  | 1.87763900  |
| C                        | 0.12751900  | -0.62492000 | 6.72866800  | C                        | -4.65024700 | 1.04280600  | -0.66721000 |
| H                        | -0.50318900 | -2.57699200 | 6.04040000  | H                        | -4.06699100 | 0.56374000  | -2.69334900 |
| H                        | 0.75344700  | 1.42449700  | 7.04304000  | H                        | -4.85932400 | 1.47976400  | 1.44556100  |
| H                        | 0.16124500  | -0.90382400 | 7.77717700  | H                        | -5.70704500 | 1.13778600  | -0.89667200 |
| H                        | 2.69272900  | 1.88824600  | 2.41062400  | H                        | -0.57427100 | -1.18649900 | 2.71062200  |
| C                        | 3.00868800  | 0.85410900  | 2.36773000  | C                        | -0.75386300 | -1.90780400 | 1.92414400  |
| C                        | 4.34161100  | 0.50716000  | 2.54428800  | C                        | -1.24430300 | -3.17400800 | 2.20829900  |
| C                        | 4.69202100  | -0.84300900 | 2.52887400  | C                        | -1.49684000 | -4.04790800 | 1.15059300  |
| H                        | 5.08467300  | 1.28154800  | 2.70103100  | H                        | -1.43214600 | -3.46182300 | 3.23699700  |
| C                        | 3.68819400  | -1.78921900 | 2.33889200  | C                        | -1.25008300 | -3.60886900 | -0.14649800 |
| H                        | 5.72268500  | -1.15273000 | 2.67009400  | H                        | -1.88554700 | -5.04512900 | 1.33151800  |
| H                        | 3.91795100  | -2.85034500 | 2.33081700  | H                        | -1.44455900 | -4.25498200 | -0.99726000 |
| H                        | -0.90569600 | -2.49860100 | -1.91731500 | H                        | 3.62967800  | -1.04350600 | -3.17016400 |
| C                        | -0.52009400 | -1.51887300 | -1.65273200 | C                        | 3.49163000  | -0.89734900 | -2.10320100 |
| C                        | -0.08985800 | -0.62902200 | -2.63876800 | C                        | 4.53140200  | -1.14677300 | -1.20716300 |
| C                        | 0.41291700  | 0.61111700  | -2.24969500 | C                        | 4.30530400  | -0.95473800 | 0.15527000  |
| H                        | -0.13853700 | -0.90470200 | -3.68749600 | H                        | 5.49619100  | -1.49098600 | -1.56659800 |
| C                        | 0.46518300  | 0.91736000  | -0.89335300 | C                        | 3.04877100  | -0.52226400 | 0.56588200  |
| H                        | 0.76756000  | 1.33076300  | -2.97961700 | H                        | 5.08152700  | -1.14197900 | 0.88933900  |
| H                        | 0.85932700  | 1.86724700  | -0.55123500 | H                        | 2.82756300  | -0.36439700 | 1.61623100  |
| H                        | 1.36009700  | -2.70104900 | 0.85586400  | H                        | 0.46654400  | -2.39170700 | -2.10300000 |



|    |             |            |            |    |            |            |             |
|----|-------------|------------|------------|----|------------|------------|-------------|
| N  | -1.83121100 | 0.61868500 | 2.07308500 | N  | 0.55318700 | 2.16668500 | -0.24154500 |
| C  | -2.96776800 | 0.84772100 | 2.13150700 | C  | 0.80942900 | 3.25886900 | -0.53749400 |
| Fe | 0.07233700  | 0.30180100 | 2.05621400 | Fe | 0.08737800 | 0.37017100 | 0.23798400  |
| H  | -1.26512500 | 3.06784700 | 1.03041100 | H  | 1.60899000 | 2.56283600 | 2.32648300  |
| C  | -0.48954800 | 3.31793800 | 1.75618400 | C  | 0.89307000 | 1.96870100 | 2.89763600  |
| O  | 0.38945100  | 2.31869700 | 2.08732800 | O  | 0.41218200 | 0.83456900 | 2.29507500  |
| H  | -0.86167000 | 3.93229900 | 2.58415400 | H  | 0.15742700 | 2.58499200 | 3.42733400  |
| O  | 0.55867900  | 4.13680600 | 0.99114600 | O  | 1.71475400 | 1.20064000 | 3.94055000  |
| H  | 1.15849900  | 3.23791400 | 1.42619200 | H  | 1.13390400 | 0.37061700 | 3.35773800  |
| H  | 0.75695900  | 5.01157300 | 1.38891200 | H  | 1.42809300 | 1.34730100 | 4.86715000  |
| C  | -4.39735500 | 1.12962400 | 2.20587300 | C  | 1.12993400 | 4.63077400 | -0.91404800 |
| H  | -4.94597300 | 0.22398700 | 2.48532800 | H  | 0.59417400 | 4.90484500 | -1.82891100 |
| H  | -4.59210500 | 1.90059700 | 2.95865900 | H  | 0.83396300 | 5.32091000 | -0.11707300 |
| H  | -4.76660100 | 1.47799300 | 1.23572900 | H  | 2.20577300 | 4.73288300 | -1.09015400 |

| <b>TS<sub>10-11</sub></b> |             |             |             | <b>11</b>                |             |             |             |
|---------------------------|-------------|-------------|-------------|--------------------------|-------------|-------------|-------------|
| Charge=2 Multiplicity =5  |             |             |             | Charge=2 Multiplicity =1 |             |             |             |
| N                         | 2.12529800  | -0.56090000 | -0.28509900 | N                        | -1.87798700 | -0.09573200 | -0.43506900 |
| N                         | -1.77709800 | 1.13598700  | -0.13418500 | N                        | 1.99639000  | -0.53399100 | 0.34329600  |
| N                         | -0.87261700 | -1.51731000 | 0.72999200  | N                        | 0.26494300  | 1.61280400  | 0.31485300  |
| C                         | 2.26336400  | -0.79966100 | -1.60826700 | C                        | -2.01551200 | -0.23054500 | -1.77980400 |
| C                         | -2.23914000 | 0.89548600  | -1.37865400 | C                        | 2.61834700  | -0.66594800 | -0.85437500 |
| C                         | -1.23858100 | -2.22548400 | -0.35688000 | C                        | 0.57708700  | 2.23378200  | -0.84145600 |
| C                         | 1.12858100  | -0.32245600 | -2.49332600 | C                        | -0.75720100 | -0.65295300 | -2.50403500 |
| H                         | 1.13423200  | -0.86562400 | -3.44843400 | H                        | -0.77047500 | -0.34365700 | -3.55569800 |
| C                         | -1.22652600 | 0.40060200  | -2.39530900 | C                        | 1.68780600  | -0.83139300 | -2.03442400 |
| H                         | -0.73991500 | 1.27917100  | -2.83464100 | H                        | 1.43317900  | -1.89050300 | -2.14251500 |
| H                         | -1.73557600 | -0.11818200 | -3.21849400 | H                        | 2.15920200  | -0.51390100 | -2.97152800 |
| C                         | -0.57095900 | -1.87094800 | -1.67126400 | C                        | 0.56430000  | 1.37924100  | -2.08470200 |
| H                         | -1.21095500 | -2.16523900 | -2.51294100 | H                        | 1.47224100  | 1.54600300  | -2.67344200 |
| N                         | -0.16992800 | -0.44312700 | -1.78990500 | N                        | 0.41811100  | -0.08737500 | -1.77493400 |
| H                         | 1.28536900  | 0.73685800  | -2.72551600 | H                        | -0.67003700 | -1.74313200 | -2.48415400 |
| C                         | -2.61400200 | 1.65733400  | 0.78189300  | C                        | 2.75061500  | -0.43748600 | 1.45371300  |
| C                         | -3.55884800 | 1.16802300  | -1.73573000 | C                        | 4.00406500  | -0.70290700 | -0.96751500 |
| C                         | -3.93837800 | 1.97148800  | 0.49867300  | C                        | 4.14106900  | -0.48224700 | 1.42037100  |
| H                         | -2.19801800 | 1.81855000  | 1.77234500  | H                        | 2.21133200  | -0.31720000 | 2.38650200  |
| C                         | -4.42002900 | 1.71758800  | -0.78596700 | C                        | 4.78076900  | -0.61525900 | 0.18922800  |
| H                         | -3.90467900 | 0.95754900  | -2.74307000 | H                        | 4.46799300  | -0.80120800 | -1.94397900 |
| H                         | -4.57505800 | 2.39555500  | 1.26754800  | H                        | 4.70495700  | -0.40526000 | 2.34368300  |
| H                         | -5.45095600 | 1.93959000  | -1.04425700 | H                        | 5.86406300  | -0.64468500 | 0.12688800  |
| H                         | -1.08052700 | -1.24612200 | 2.76604000  | H                        | -0.00984100 | 1.80458700  | 2.35463300  |
| C                         | -1.38576100 | -1.86190400 | 1.92616200  | C                        | 0.22679700  | 2.34668700  | 1.44748900  |
| C                         | -2.26341400 | -2.92612300 | 2.09560800  | C                        | 0.48640100  | 3.71063200  | 1.46650000  |
| C                         | -2.64332600 | -3.65770500 | 0.96995000  | C                        | 0.81109300  | 4.35082800  | 0.27003600  |

|    |             |             |             |    |             |             |             |
|----|-------------|-------------|-------------|----|-------------|-------------|-------------|
| H  | -2.64482600 | -3.16846400 | 3.08166900  | H  | 0.44109400  | 4.25498400  | 2.40347900  |
| C  | -2.12768500 | -3.29719700 | -0.27391800 | C  | 0.85895900  | 3.59723100  | -0.89994000 |
| H  | -3.33356800 | -4.49119600 | 1.05740000  | H  | 1.02577700  | 5.41464000  | 0.24873600  |
| H  | -2.40711100 | -3.84401800 | -1.16931400 | H  | 1.11021300  | 4.05968300  | -1.84969400 |
| H  | 3.47636900  | -1.59984500 | -3.19659400 | H  | -3.29479800 | -0.12665500 | -3.50443200 |
| C  | 3.40084000  | -1.41205900 | -2.12998200 | C  | -3.22765800 | -0.01800800 | -2.42641700 |
| C  | 4.43372700  | -1.77770400 | -1.26572100 | C  | -4.34679700 | 0.33567100  | -1.67008200 |
| C  | 4.29235900  | -1.52854400 | 0.09900100  | C  | -4.20514700 | 0.47678200  | -0.29169400 |
| H  | 5.32890400  | -2.25540700 | -1.65191300 | H  | -5.30460400 | 0.50531500  | -2.15192500 |
| C  | 3.12163500  | -0.92346800 | 0.54365600  | C  | -2.95730900 | 0.26038700  | 0.28785400  |
| H  | 5.06707800  | -1.80211500 | 0.80704700  | H  | -5.04397900 | 0.75985900  | 0.33492100  |
| H  | 2.96488500  | -0.71653400 | 1.59759200  | H  | -2.82101700 | 0.36983700  | 1.35904400  |
| H  | 0.33807700  | -2.47846500 | -1.74840700 | H  | -0.27448200 | 1.68751700  | -2.71754700 |
| N  | 1.02236200  | 2.33463900  | -0.17519400 | N  | -0.16986900 | -2.27269600 | 0.05794600  |
| C  | 1.38484700  | 3.39378700  | -0.47977200 | C  | -0.25758800 | -3.42936000 | 0.08045500  |
| Fe | 0.21364300  | 0.33439500  | 0.31632200  | Fe | 0.01371000  | -0.35130800 | 0.17497500  |
| H  | 2.13013700  | 2.09892100  | 2.48617200  | H  | -1.66877400 | -1.91819000 | 2.47119600  |
| C  | 1.30839800  | 1.61968200  | 3.02195500  | C  | -0.95300200 | -1.19021200 | 2.87115100  |
| O  | 0.61786000  | 0.64610600  | 2.34480200  | O  | -0.26255900 | -0.48980100 | 2.13296700  |
| H  | 0.70276900  | 2.33014000  | 3.59578900  | H  | -0.83351900 | -1.12487600 | 3.95588600  |
| O  | 1.94851200  | 0.63273800  | 4.00449200  | O  | -3.14948200 | 0.03549900  | 3.62741300  |
| H  | 1.21295100  | -0.02471100 | 3.37601600  | H  | -3.11626000 | 0.76944000  | 4.26211300  |
| H  | 1.69906900  | 0.77546300  | 4.94240900  | C  | -0.36268900 | -4.88405300 | 0.09863800  |
| C  | 1.84057600  | 4.72475600  | -0.86316400 | H  | 0.12776900  | -5.30752900 | -0.78412700 |
| H  | 1.44390200  | 4.98738700  | -1.84918300 | H  | 0.12285500  | -5.28552800 | 0.99418800  |
| H  | 1.49520300  | 5.46556600  | -0.13489100 | H  | -1.41446500 | -5.18816700 | 0.09698500  |
| H  | 2.93435100  | 4.74817700  | -0.90403200 | H  | -3.94610200 | -0.45925900 | 3.87982000  |

|                          |             |             |                          |   |             |             |             |
|--------------------------|-------------|-------------|--------------------------|---|-------------|-------------|-------------|
| <b>11</b>                |             |             | <b>11</b>                |   |             |             |             |
| Charge=2 Multiplicity =3 |             |             | Charge=2 Multiplicity =5 |   |             |             |             |
| N                        | -0.01965900 | 0.04052500  | 0.12147800               | N | 2.07534100  | -0.24610200 | -0.50871300 |
| N                        | -0.07141100 | -0.09921600 | 4.18193000               | N | -1.94826300 | 0.98394900  | 0.15229900  |
| N                        | 1.94212000  | -0.00818100 | 2.19816900               | N | -0.64830000 | -1.63152400 | 0.53946500  |
| C                        | -0.35870700 | -1.21240300 | -0.26607800              | C | 2.12772000  | -0.28932800 | -1.86011400 |
| C                        | -0.37549400 | -1.38279800 | 4.48318400               | C | -2.47734300 | 0.90015000  | -1.08694400 |
| C                        | 2.35826400  | -1.29282200 | 2.15317500               | C | -1.05402000 | -2.22284500 | -0.60195800 |
| C                        | -0.81938400 | -2.15465100 | 0.83190800               | C | 0.89596800  | 0.20722900  | -2.59279900 |
| H                        | -0.71957900 | -3.19857800 | 0.50581300               | H | 0.87309000  | -0.18925500 | -3.61684900 |
| C                        | -0.79881600 | -2.26391700 | 3.32073400               | C | -1.49707500 | 0.69549200  | -2.22753500 |
| H                        | -1.87066100 | -2.11868200 | 3.14503800               | H | -1.11673400 | 1.68020000  | -2.52298100 |
| H                        | -0.65868000 | -3.32329400 | 3.57373800               | H | -2.01160600 | 0.28136000  | -3.10455100 |
| C                        | 1.31217000  | -2.38641100 | 2.04370700               | C | -0.61336600 | -1.59575200 | -1.91176700 |
| H                        | 1.47088200  | -3.11449500 | 2.84826200               | H | -1.34976200 | -1.80648900 | -2.69725400 |

|    |             |             |             |    |             |             |             |
|----|-------------|-------------|-------------|----|-------------|-------------|-------------|
| N  | -0.08356300 | -1.88597200 | 2.08464700  | N  | -0.33340100 | -0.13500300 | -1.83568700 |
| H  | -1.88398000 | -1.97994900 | 1.02334100  | H  | 0.94596000  | 1.29898200  | -2.67196000 |
| C  | 0.25675000  | 0.74564200  | 5.17810800  | C  | -2.76204300 | 1.24793700  | 1.19155900  |
| C  | -0.35362900 | -1.84866200 | 5.79527100  | C  | -3.84074200 | 1.07498800  | -1.31554000 |
| C  | 0.28627000  | 0.35311400  | 6.51206400  | C  | -4.12949800 | 1.45162900  | 1.04188900  |
| H  | 0.50454100  | 1.76007500  | 4.88272200  | H  | -2.29145900 | 1.28911900  | 2.16940900  |
| C  | -0.02321100 | -0.96930100 | 6.82705500  | C  | -4.67897000 | 1.35964300  | -0.23696900 |
| H  | -0.59448300 | -2.88633400 | 6.00463800  | H  | -4.23889500 | 0.99466900  | -2.32231000 |
| H  | 0.55442200  | 1.06988500  | 7.28059900  | H  | -4.74574700 | 1.66797100  | 1.90779200  |
| H  | -0.00231000 | -1.31369100 | 7.85633600  | H  | -5.74385700 | 1.50235700  | -0.39330100 |
| H  | 2.49051100  | 1.98068500  | 2.34804500  | H  | -0.61597700 | -1.69270200 | 2.60429900  |
| C  | 2.87281000  | 0.96875800  | 2.29451700  | C  | -0.94843400 | -2.21821700 | 1.71506500  |
| C  | 4.23468300  | 0.70849900  | 2.33940600  | C  | -1.65028300 | -3.41413300 | 1.80329100  |
| C  | 4.66644500  | -0.61732200 | 2.28781900  | C  | -2.07638800 | -4.02304300 | 0.62222800  |
| H  | 4.93855100  | 1.52983800  | 2.41815500  | H  | -1.86448000 | -3.85069800 | 2.77281600  |
| C  | 3.71224400  | -1.62575600 | 2.19604800  | C  | -1.77718800 | -3.41569000 | -0.59602000 |
| H  | 5.72377600  | -0.86065400 | 2.32256100  | H  | -2.63602100 | -4.95305500 | 0.64866100  |
| H  | 4.01022800  | -2.66942500 | 2.15874200  | H  | -2.09597800 | -3.86431400 | -1.53200000 |
| H  | -0.59516200 | -2.61309500 | -1.87925800 | H  | 3.26778400  | -0.76376900 | -3.62279500 |
| C  | -0.32581600 | -1.59828200 | -1.60325800 | C  | 3.26045400  | -0.73286800 | -2.53764700 |
| C  | 0.05370600  | -0.66970000 | -2.57317600 | C  | 4.37693600  | -1.13552500 | -1.80305400 |
| C  | 0.39885400  | 0.61868800  | -2.16972500 | C  | 4.31935300  | -1.09405400 | -0.41103300 |
| H  | 0.08478100  | -0.95143800 | -3.62111400 | H  | 5.27074600  | -1.48423800 | -2.31129500 |
| C  | 0.35481400  | 0.93454600  | -0.81502300 | C  | 3.15023500  | -0.64742700 | 0.19842800  |
| H  | 0.70693700  | 1.37141400  | -2.88723700 | H  | 5.16050800  | -1.40853000 | 0.19721000  |
| H  | 0.62457500  | 1.92853800  | -0.46859900 | H  | 3.06621900  | -0.61249900 | 1.28202800  |
| H  | 1.47474600  | -2.93416600 | 1.10793700  | H  | 0.31219700  | -2.09762600 | -2.21660400 |
| N  | -1.89414600 | 0.71064600  | 2.16647800  | N  | 0.74777600  | 2.47569700  | 0.09457100  |
| C  | -3.02590500 | 0.96284900  | 2.18781500  | C  | 0.99938100  | 3.60482000  | 0.01298600  |
| Fe | -0.00784500 | 0.35156300  | 2.16760200  | Fe | 0.14536500  | 0.37517500  | 0.29807200  |
| H  | -1.13278300 | 3.56690400  | 1.35619400  | H  | 2.03489900  | 1.73609100  | 2.87295400  |
| C  | -0.25478200 | 3.59536800  | 2.01629800  | C  | 1.17604300  | 1.13781300  | 3.20267600  |
| O  | 0.29024500  | 2.57154600  | 2.40917400  | O  | 0.40951800  | 0.61323200  | 2.40116800  |
| H  | 0.08410800  | 4.58084200  | 2.36026500  | H  | 0.98702500  | 1.07043000  | 4.28068200  |
| O  | 0.84425500  | 4.29002800  | -0.18437300 | O  | 3.09647000  | -0.47546900 | 3.66288600  |
| H  | 1.72455800  | 4.69836700  | -0.14800800 | H  | 2.91467800  | -1.29411900 | 4.15242000  |
| C  | -4.45009100 | 1.27309800  | 2.21948700  | C  | 1.31398600  | 5.02420300  | -0.09304700 |
| H  | -5.01664800 | 0.40240700  | 2.56595000  | H  | 0.85798100  | 5.44248300  | -0.99619600 |
| H  | -4.63861800 | 2.10767900  | 2.90278900  | H  | 0.92780900  | 5.56068800  | 0.77960500  |
| H  | -4.79986300 | 1.54597700  | 1.21853800  | H  | 2.39854600  | 5.16359100  | -0.14642900 |
| H  | 0.35512000  | 4.83848700  | -0.81965100 | H  | 3.92526500  | -0.14655700 | 4.04864300  |

12

Charge=2 Multiplicity =1

12

Charge=2 Multiplicity =3

|    |             |             |             |    |             |             |             |
|----|-------------|-------------|-------------|----|-------------|-------------|-------------|
| Fe | 0.18759400  | 0.30659700  | 0.33516800  | Fe | 0.18844000  | 0.30553800  | 0.33409400  |
| N  | 2.08652100  | -0.24244900 | 0.59453200  | N  | 2.08654100  | -0.24611200 | 0.59534100  |
| N  | -1.50602100 | 0.97748500  | -0.45295100 | N  | -1.50596300 | 0.97661200  | -0.45237600 |
| N  | -0.26475000 | -1.47126700 | -0.37213200 | N  | -0.26888400 | -1.47221500 | -0.37095700 |
| C  | 2.94509600  | 0.14146100  | -0.38191800 | C  | 2.94499700  | 0.13545400  | -0.38243300 |
| C  | 4.28850900  | -0.21375000 | -0.34351000 | C  | 4.28834000  | -0.22001800 | -0.34341000 |
| H  | 4.95628800  | 0.09701200  | -1.14082700 | H  | 4.95604900  | 0.08872400  | -1.14158000 |
| C  | 4.75907500  | -0.96807600 | 0.73416700  | C  | 4.75907000  | -0.97192200 | 0.73590800  |
| H  | 5.80489600  | -1.25483900 | 0.78467000  | H  | 5.80486400  | -1.25871400 | 0.78680600  |
| C  | 3.86942800  | -1.34914000 | 1.73792900  | C  | 3.86963700  | -1.35054400 | 1.74075300  |
| H  | 4.19633100  | -1.93427600 | 2.59055500  | H  | 4.19662400  | -1.93379700 | 2.59462600  |
| C  | 2.53478500  | -0.97123300 | 1.63342400  | C  | 2.53505200  | -0.97244700 | 1.63563900  |
| H  | 1.79383600  | -1.23586500 | 2.37898200  | H  | 1.79443600  | -1.23534300 | 2.38219300  |
| C  | -1.37698200 | 1.57878900  | -1.66253200 | C  | -1.37702600 | 1.57219300  | -1.66500700 |
| C  | -2.48527400 | 2.04386400  | -2.35960800 | C  | -2.48537100 | 2.03661200  | -2.36248500 |
| H  | -2.35918900 | 2.51428300  | -3.32968200 | H  | -2.35967300 | 2.50240200  | -3.33484900 |
| C  | -3.75304100 | 1.89808200  | -1.79053400 | C  | -3.75266600 | 1.89649400  | -1.79092200 |
| H  | -4.63207600 | 2.25731800  | -2.31671500 | H  | -4.63158400 | 2.25540400  | -2.31752100 |
| C  | -3.87170900 | 1.27648900  | -0.54930300 | C  | -3.87102700 | 1.28119200  | -0.54655400 |
| H  | -4.83899500 | 1.13469300  | -0.07971800 | H  | -4.83792400 | 1.14407800  | -0.07480000 |
| C  | -2.72666800 | 0.81568800  | 0.09574800  | C  | -2.72606000 | 0.82064700  | 0.09887400  |
| H  | -2.77396000 | 0.29040900  | 1.04790100  | H  | -2.77317600 | 0.29997700  | 1.05359600  |
| C  | 0.06992800  | -1.72364200 | -1.65470700 | C  | 0.06364500  | -1.72819700 | -1.65352900 |
| C  | -0.20697500 | -2.95100300 | -2.25094900 | C  | -0.22061100 | -2.95491900 | -2.24748800 |
| H  | 0.07599800  | -3.12648300 | -3.28441500 | H  | 0.06061200  | -3.13345800 | -3.28090800 |
| C  | -0.85040900 | -3.93767600 | -1.50640700 | C  | -0.86866000 | -3.93695100 | -1.50078800 |
| H  | -1.07344100 | -4.90222100 | -1.95182900 | H  | -1.09736400 | -4.90095000 | -1.94450900 |
| C  | -1.21404400 | -3.65832700 | -0.18911500 | C  | -1.22945900 | -3.65356600 | -0.18363400 |
| H  | -1.73439700 | -4.38830900 | 0.42110400  | H  | -1.75320700 | -4.37966400 | 0.42830100  |
| C  | -0.91178000 | -2.41443600 | 0.34943100  | C  | -0.92030400 | -2.41044200 | 0.35295200  |
| H  | -1.21999500 | -2.13261400 | 1.35052300  | H  | -1.22622200 | -2.12527300 | 1.35365000  |
| C  | 2.33514700  | 1.01582700  | -1.45461500 | C  | 2.33616900  | 1.00776200  | -1.45799300 |
| H  | 2.87740000  | 0.93544200  | -2.40336000 | H  | 2.87962800  | 0.92456800  | -2.40580000 |
| C  | 0.04443800  | 1.75226400  | -2.15100500 | C  | 0.04390600  | 1.74242200  | -2.15725200 |
| H  | 0.44370600  | 2.69719400  | -1.76855500 | H  | 0.44446100  | 2.68876400  | -1.77969300 |
| H  | 0.09250100  | 1.79899000  | -3.24462300 | H  | 0.08899000  | 1.78486000  | -3.25115100 |
| C  | 0.75436300  | -0.61485900 | -2.41720900 | C  | 0.75597300  | -0.62521500 | -2.41707300 |
| H  | 1.74854300  | -0.94842400 | -2.73196000 | H  | 1.75114600  | -0.96358200 | -2.72348000 |
| H  | 0.19716600  | -0.39880700 | -3.33476200 | H  | 0.20571700  | -0.41150300 | -3.33935400 |
| N  | 0.89514200  | 0.64751900  | -1.61122300 | N  | 0.89618700  | 0.63981900  | -1.61575500 |
| O  | -0.32465900 | -0.05180500 | 1.83616500  | O  | -0.32180700 | -0.04409600 | 1.83404300  |
| H  | -2.14730300 | -0.73428200 | 3.20493800  | H  | -2.13150500 | -0.72705100 | 3.20318400  |
| O  | -2.82229700 | -1.17205500 | 2.66311300  | O  | -2.81669000 | -1.16142700 | 2.67142400  |
| C  | -3.87127900 | -1.64247100 | 3.52378500  | C  | -3.86015800 | -1.61774400 | 3.54618000  |

|   |             |             |             |   |             |             |             |
|---|-------------|-------------|-------------|---|-------------|-------------|-------------|
| H | -3.49911000 | -2.37342400 | 4.25149200  | H | -3.48706400 | -2.35020100 | 4.27191900  |
| H | -4.60846300 | -2.12948300 | 2.88240700  | H | -4.61009200 | -2.09907200 | 2.91538200  |
| H | -4.35793400 | -0.81753600 | 4.05806300  | H | -4.33165000 | -0.78594600 | 4.08340600  |
| H | 2.38391400  | 2.06256900  | -1.13876400 | H | 2.38501900  | 2.05524700  | -1.14478000 |
| N | 0.64387700  | 2.15271100  | 0.92460300  | N | 0.65085500  | 2.15692400  | 0.91152400  |
| C | 0.80453900  | 3.15118300  | 1.48573400  | C | 0.81382800  | 3.15613600  | 1.47083000  |
| C | 1.00213700  | 4.40350200  | 2.20143000  | C | 1.01390300  | 4.40881200  | 2.18508800  |
| H | 2.03551900  | 4.74587800  | 2.08545300  | H | 2.05799700  | 4.72769400  | 2.10300300  |
| H | 0.32275200  | 5.16927600  | 1.81328600  | H | 0.36538200  | 5.18659800  | 1.76904700  |
| H | 0.79513200  | 4.24965300  | 3.26600500  | H | 0.76685500  | 4.26669000  | 3.24276300  |

| <b>12</b>                |             |             |             | <b>TS<sub>12-13</sub></b> |             |             |             |
|--------------------------|-------------|-------------|-------------|---------------------------|-------------|-------------|-------------|
| Charge=2 Multiplicity =5 |             |             |             | Charge=2 Multiplicity =1  |             |             |             |
| Fe                       | 0.28635400  | 0.26619400  | 0.31390200  | Fe                        | 0.03907000  | 0.24766500  | 0.07733900  |
| N                        | 2.21978500  | -0.33942300 | 0.62877300  | N                         | 1.98191200  | -0.12877800 | -0.11978500 |
| N                        | -1.38084900 | 1.03555300  | -0.62042700 | N                         | -1.92243800 | 0.36468300  | -0.22412800 |
| N                        | -0.60351800 | -1.62892800 | 0.04728400  | N                         | -0.23443700 | -1.51785800 | 0.91897900  |
| C                        | 3.00893700  | -0.35394100 | -0.47482000 | C                         | 2.36221900  | -0.56392200 | -1.34614100 |
| C                        | 4.32536500  | -0.79494600 | -0.41320400 | C                         | 3.67924200  | -0.91922000 | -1.61274500 |
| H                        | 4.93967100  | -0.80764700 | -1.30796800 | H                         | 3.95810300  | -1.27337400 | -2.60015400 |
| C                        | 4.84041700  | -1.21499400 | 0.81657300  | C                         | 4.62953300  | -0.80725500 | -0.59481100 |
| H                        | 5.86663100  | -1.56249200 | 0.88675900  | H                         | 5.66450100  | -1.07631500 | -0.78162900 |
| C                        | 4.02372300  | -1.18695700 | 1.94742600  | C                         | 4.23000700  | -0.35158500 | 0.66080900  |
| H                        | 4.39048700  | -1.50545600 | 2.91705100  | H                         | 4.93715800  | -0.25157500 | 1.47696000  |
| C                        | 2.71245600  | -0.74394600 | 1.81571200  | C                         | 2.89303900  | -0.02645200 | 0.86562100  |
| H                        | 2.02657600  | -0.69806800 | 2.65455300  | H                         | 2.52041900  | 0.32726000  | 1.81964100  |
| C                        | -1.27063500 | 1.13310600  | -1.96783700 | C                         | -2.33655800 | 0.01358900  | -1.46536500 |
| C                        | -2.35007200 | 1.51542500  | -2.75504900 | C                         | -3.68595700 | -0.01242700 | -1.79825600 |
| H                        | -2.24392900 | 1.58155900  | -3.83329100 | H                         | -3.99488200 | -0.30467300 | -2.79690600 |
| C                        | -3.56532000 | 1.81629600  | -2.13385400 | C                         | -4.62761200 | 0.34745400  | -0.83116200 |
| H                        | -4.42038700 | 2.12120700  | -2.72947300 | H                         | -5.68665300 | 0.33666000  | -1.06944100 |
| C                        | -3.66843100 | 1.70701200  | -0.74788700 | C                         | -4.19002300 | 0.71418100  | 0.44120100  |
| H                        | -4.59939300 | 1.91870800  | -0.23339900 | H                         | -4.89075400 | 0.99763200  | 1.21893600  |
| C                        | -2.55661300 | 1.30103900  | -0.01542900 | C                         | -2.82572600 | 0.70562800  | 0.71300100  |
| H                        | -2.60130700 | 1.14424000  | 1.06038500  | H                         | -2.41965100 | 0.97007400  | 1.68243800  |
| C                        | -0.40624700 | -2.17813400 | -1.16935700 | C                         | -0.35977800 | -2.56912900 | 0.08496400  |
| C                        | -1.06562800 | -3.33825800 | -1.56207000 | C                         | -0.58639900 | -3.85813800 | 0.56261500  |
| H                        | -0.89472500 | -3.75986200 | -2.54778900 | H                         | -0.68467700 | -4.68582700 | -0.13322000 |
| C                        | -1.94096200 | -3.95024800 | -0.66238600 | C                         | -0.68078100 | -4.06443600 | 1.93741800  |
| H                        | -2.46322000 | -4.85966500 | -0.94350900 | H                         | -0.85638500 | -5.06071400 | 2.33120000  |
| C                        | -2.14391900 | -3.37305100 | 0.59111100  | C                         | -0.54550100 | -2.97206100 | 2.79574700  |
| H                        | -2.82673700 | -3.81223400 | 1.31013200  | H                         | -0.61083800 | -3.08738200 | 3.87214100  |
| C                        | -1.46728900 | -2.20069900 | 0.91167700  | C                         | -0.32507300 | -1.71411300 | 2.25165500  |

|   |             |             |             |   |             |             |             |
|---|-------------|-------------|-------------|---|-------------|-------------|-------------|
| H | -1.64107500 | -1.67416700 | 1.84560500  | H | -0.21576700 | -0.82322200 | 2.85927600  |
| C | 2.36464100  | 0.19927600  | -1.72533200 | C | 1.26084300  | -0.56703400 | -2.38046600 |
| H | 2.81443600  | -0.21621900 | -2.63409200 | H | 1.44514200  | -1.29856100 | -3.17491800 |
| C | 0.10850800  | 0.88315700  | -2.53611400 | C | -1.21944600 | -0.27205100 | -2.44145100 |
| H | 0.65426700  | 1.83195200  | -2.54837500 | H | -0.90693000 | 0.66653700  | -2.91038400 |
| H | 0.05593900  | 0.52505800  | -3.56995000 | H | -1.53585200 | -0.94996300 | -3.24171900 |
| C | 0.63672400  | -1.51472400 | -2.03760000 | C | -0.22008300 | -2.28708900 | -1.39221200 |
| H | 1.58086100  | -2.05394700 | -1.90417200 | H | 0.64308600  | -2.83441400 | -1.78479300 |
| H | 0.37690900  | -1.59244100 | -3.09852900 | H | -1.09550700 | -2.66488200 | -1.93027000 |
| N | 0.88982300  | -0.07061400 | -1.68018100 | N | -0.04452300 | -0.82089200 | -1.69312800 |
| O | -0.13587300 | 0.43322000  | 1.86166700  | H | 1.20552800  | 0.42039200  | -2.84916200 |
| H | -1.91541100 | 0.35790200  | 3.32260800  | N | 0.29965100  | 1.98014700  | -0.79902400 |
| O | -2.74373600 | 0.01410800  | 2.95260300  | C | 0.47188100  | 3.10314900  | -1.01613900 |
| C | -3.73878400 | -0.00305800 | 3.98795000  | C | 0.69913800  | 4.51806600  | -1.25785500 |
| H | -3.44359700 | -0.65164700 | 4.82140800  | H | 1.56418700  | 4.66006300  | -1.91334900 |
| H | -4.65113600 | -0.40137600 | 3.53963200  | H | -0.18274500 | 4.97310100  | -1.71975700 |
| H | -3.94375200 | 1.00428900  | 4.37011500  | H | 0.89220600  | 4.99551300  | -0.29137400 |
| H | 2.50734200  | 1.28331500  | -1.74900500 | H | 0.12575200  | 3.04804300  | 3.89009600  |
| N | 1.11197300  | 2.39756500  | 0.19204200  | C | 0.05498500  | 3.72776500  | 3.03251100  |
| C | 1.35406100  | 3.47525300  | 0.54546900  | O | 0.70146700  | 3.23057800  | 1.89105800  |
| C | 1.65837600  | 4.82938500  | 0.98757900  | H | 0.57335100  | 4.66563500  | 3.29137300  |
| H | 2.70548700  | 5.06764700  | 0.77469600  | H | -0.99432700 | 3.99095900  | 2.83290500  |
| H | 1.01528300  | 5.54656400  | 0.46740700  | H | 0.54882100  | 2.06843300  | 1.80870600  |
| H | 1.48609800  | 4.91210100  | 2.06580700  | O | 0.09253900  | 0.98700700  | 1.64251000  |

| <b>TS<sub>12-13</sub></b> |             |             |             | <b>TS<sub>12-13</sub></b> |             |             |             |
|---------------------------|-------------|-------------|-------------|---------------------------|-------------|-------------|-------------|
| Charge=2 Multiplicity =3  |             |             |             | Charge=2 Multiplicity =5  |             |             |             |
| Fe                        | 0.05772300  | 0.24181000  | 0.07255700  | Fe                        | -0.07257900 | -0.00272000 | -0.02384400 |
| N                         | 1.88762700  | -0.48702500 | -0.18850200 | N                         | 0.05886700  | -0.03624100 | 2.08420900  |
| N                         | -1.85653800 | 0.73075700  | -0.16092500 | N                         | 0.56686100  | 0.06342200  | -2.03165800 |
| N                         | -0.51131000 | -1.44581600 | 0.92843100  | N                         | -0.02721400 | -2.00451000 | 0.05879900  |
| C                         | 2.13346800  | -0.99162900 | -1.42271800 | C                         | 1.31594000  | 0.03849900  | 2.58238300  |
| C                         | 3.34948900  | -1.58942300 | -1.73193100 | C                         | 1.57015500  | -0.12633900 | 3.93852200  |
| H                         | 3.51998000  | -1.99420600 | -2.72452100 | H                         | 2.58230000  | -0.06866200 | 4.31829000  |
| C                         | 4.34154500  | -1.65244500 | -0.75025300 | C                         | 0.49193800  | -0.35907600 | 4.79984400  |
| H                         | 5.29987000  | -2.11225900 | -0.97078400 | H                         | 0.66319100  | -0.48824200 | 5.86127200  |
| C                         | 4.08280500  | -1.12137600 | 0.51254800  | C                         | -0.80413400 | -0.42610600 | 4.28027200  |
| H                         | 4.82702200  | -1.14963800 | 1.30088200  | H                         | -1.65441600 | -0.60396800 | 4.92479200  |
| C                         | 2.83909900  | -0.55016200 | 0.76156000  | C                         | -0.98753600 | -0.26745200 | 2.91079700  |
| H                         | 2.57826800  | -0.12476100 | 1.72321800  | H                         | -1.96052600 | -0.32520800 | 2.44021700  |
| C                         | -2.37074800 | 0.47053200  | -1.38718400 | C                         | 1.88790600  | 0.32226500  | -2.20350900 |
| C                         | -3.71046600 | 0.70362000  | -1.67529800 | C                         | 2.46733900  | 0.33782200  | -3.46569500 |
| H                         | -4.10207000 | 0.47999000  | -2.66261400 | H                         | 3.52472700  | 0.53923500  | -3.58162600 |

|   |             |             |             |   |             |             |             |
|---|-------------|-------------|-------------|---|-------------|-------------|-------------|
| C | -4.53392000 | 1.23258400  | -0.67841700 | C | 1.65669000  | 0.09093800  | -4.57979500 |
| H | -5.58283700 | 1.42487500  | -0.88152800 | H | 2.08435900  | 0.09848000  | -5.57463600 |
| C | -3.99263000 | 1.50457400  | 0.57764700  | C | 0.29630500  | -0.17214000 | -4.39773800 |
| H | -4.60010000 | 1.91413200  | 1.37731800  | H | -0.35056200 | -0.37080000 | -5.24158900 |
| C | -2.64669900 | 1.23504100  | 0.80432200  | C | -0.21992000 | -0.18253300 | -3.10568100 |
| H | -2.16639400 | 1.41547600  | 1.75904700  | H | -1.26175800 | -0.38737600 | -2.89575400 |
| C | -0.85851600 | -2.45347300 | 0.10340200  | C | 1.19510400  | -2.56353000 | 0.22149500  |
| C | -1.29347200 | -3.68288200 | 0.59358100  | C | 1.33514900  | -3.93133700 | 0.43014300  |
| H | -1.56728000 | -4.47609900 | -0.09544900 | H | 2.31799700  | -4.36531700 | 0.56431800  |
| C | -1.36808200 | -3.87490400 | 1.97158700  | C | 0.19202900  | -4.73446800 | 0.45364100  |
| H | -1.70402000 | -4.82506300 | 2.37507900  | H | 0.28160300  | -5.80197300 | 0.61215300  |
| C | -1.00437000 | -2.82824600 | 2.82032700  | C | -1.06381500 | -4.14814500 | 0.26940600  |
| H | -1.04655600 | -2.93422900 | 3.89883400  | H | -1.96544000 | -4.74560100 | 0.27822000  |
| C | -0.58186200 | -1.62842100 | 2.26443100  | C | -1.14239900 | -2.77504700 | 0.08147500  |
| H | -0.28841700 | -0.77537500 | 2.86473100  | H | -2.07174400 | -2.23742800 | -0.04942200 |
| C | 1.01621300  | -0.78780000 | -2.41921800 | C | 2.36794200  | 0.39484400  | 1.55774100  |
| H | 1.03072600  | -1.54221800 | -3.21339200 | H | 3.36201500  | 0.04332400  | 1.84874100  |
| C | -1.36106700 | -0.01756200 | -2.39934900 | C | 2.62621500  | 0.62671500  | -0.91999100 |
| H | -0.88891700 | 0.84649600  | -2.87785000 | H | 2.50787400  | 1.68602600  | -0.67300800 |
| H | -1.82662700 | -0.61735000 | -3.18900700 | H | 3.69325400  | 0.39546900  | -0.99418800 |
| C | -0.73922800 | -2.19161400 | -1.37886400 | C | 2.38307700  | -1.64419800 | 0.07481000  |
| H | -0.02563500 | -2.89693700 | -1.81699700 | H | 3.15892400  | -1.87691900 | 0.80985300  |
| H | -1.69976700 | -2.37991900 | -1.86928200 | H | 2.80710400  | -1.78352500 | -0.92602400 |
| N | -0.29066600 | -0.78658100 | -1.68854000 | N | 1.97579800  | -0.17271000 | 0.20084400  |
| H | 1.13428300  | 0.19121900  | -2.89403700 | H | 2.39920000  | 1.48462700  | 1.45134200  |
| N | 0.61261000  | 1.89609700  | -0.81628600 | N | -0.06020300 | 2.03901200  | 0.06239200  |
| C | 1.00429600  | 2.96512700  | -1.02160800 | C | -0.49968500 | 3.11256100  | 0.10796300  |
| C | 1.51185700  | 4.30683700  | -1.25270900 | C | -1.08599600 | 4.43284600  | 0.17687000  |
| H | 2.30078900  | 4.29240300  | -2.01136900 | H | -0.78473700 | 4.94740000  | 1.09596100  |
| H | 0.70493300  | 4.96871800  | -1.58274700 | H | -0.79058700 | 5.03830600  | -0.68712100 |
| H | 1.92240900  | 4.67427800  | -0.30621400 | H | -2.17272200 | 4.28850000  | 0.17337300  |
| H | 1.14493800  | 2.89820200  | 3.88155500  | H | -4.50020500 | 0.98038000  | -1.26480900 |
| C | 1.22293500  | 3.57621800  | 3.02179300  | C | -4.09678400 | 1.98396900  | -1.09631700 |
| O | 1.59383600  | 2.92252300  | 1.84335700  | O | -3.06456500 | 2.00570700  | -0.08388200 |
| H | 2.02871400  | 4.30049800  | 3.23493800  | H | -4.91029200 | 2.62259300  | -0.71364100 |
| H | 0.29807000  | 4.16149600  | 2.90514700  | H | -3.75176500 | 2.43135100  | -2.03770000 |
| H | 0.99332100  | 1.83690300  | 1.74282100  | H | -2.40808100 | 0.80225300  | -0.04075200 |
| O | 0.29098500  | 0.95706500  | 1.62472000  | O | -1.78599700 | -0.07337500 | -0.20701700 |

**13**

Charge=2 Multiplicity =1

Fe 0.06968200 -0.32017100 0.28346800

**13**

Charge=2 Multiplicity =3

Fe 0.07113700 -0.31898500 0.28647800

|   |             |             |             |   |             |             |             |
|---|-------------|-------------|-------------|---|-------------|-------------|-------------|
| N | -1.75808100 | -0.67398400 | -0.45728900 | N | -1.75556800 | -0.68796200 | -0.44924000 |
| N | 2.03437000  | -0.14657300 | 0.54057200  | N | 2.03492900  | -0.13600700 | 0.54215000  |
| N | 0.01567300  | 1.52994100  | -0.41668600 | N | 0.00964900  | 1.52524000  | -0.42838700 |
| C | -1.74968500 | -1.39812100 | -1.60595300 | C | -1.74452300 | -1.42118900 | -1.59214100 |
| C | -2.92391300 | -1.73225700 | -2.27014500 | C | -2.91764600 | -1.76709300 | -2.25222900 |
| H | -2.88245100 | -2.30363800 | -3.19213900 | H | -2.87408800 | -2.34551000 | -3.16973000 |
| C | -4.14632900 | -1.32568000 | -1.73100100 | C | -4.14168200 | -1.36323800 | -1.71472800 |
| H | -5.07661200 | -1.57775700 | -2.23044900 | H | -5.07112800 | -1.62447400 | -2.21101700 |
| C | -4.14914200 | -0.58622200 | -0.55029700 | C | -4.14724500 | -0.61477300 | -0.53972300 |
| H | -5.07485200 | -0.24480200 | -0.10014800 | H | -5.07434700 | -0.27530600 | -0.09096700 |
| C | -2.93637100 | -0.27476900 | 0.05788100  | C | -2.93552500 | -0.29162700 | 0.06445000  |
| H | -2.90225000 | 0.30957200  | 0.96987000  | H | -2.90368300 | 0.30016100  | 0.97173100  |
| C | 2.78757000  | -0.60459100 | -0.48702900 | C | 2.78973200  | -0.59820800 | -0.48239200 |
| C | 4.17082500  | -0.46506700 | -0.49144800 | C | 4.17246000  | -0.45350200 | -0.48788000 |
| H | 4.75370100  | -0.83279900 | -1.33006700 | H | 4.75666800  | -0.82470400 | -1.32404100 |
| C | 4.79107400  | 0.14468000  | 0.60167900  | C | 4.79049000  | 0.16590800  | 0.60105900  |
| H | 5.87008300  | 0.26254200  | 0.62122600  | H | 5.86905100  | 0.28794800  | 0.61969700  |
| C | 4.00804300  | 0.59523700  | 1.66382400  | C | 4.00587300  | 0.62063900  | 1.66025900  |
| H | 4.45377700  | 1.06601300  | 2.53326800  | H | 4.44990900  | 1.09890800  | 2.52647500  |
| C | 2.62689900  | 0.43874000  | 1.59660400  | C | 2.62532100  | 0.45858700  | 1.59419000  |
| H | 1.95531700  | 0.76060300  | 2.38443400  | H | 1.95253300  | 0.78337500  | 2.37979800  |
| C | 0.32571400  | 1.67231100  | -1.72303800 | C | 0.31985800  | 1.65834200  | -1.73573900 |
| C | 0.42136500  | 2.92480100  | -2.32529100 | C | 0.41297600  | 2.90634500  | -2.34752000 |
| H | 0.67634700  | 3.00100900  | -3.37788200 | H | 0.66824100  | 2.97506600  | -3.40055700 |
| C | 0.18702900  | 4.06571400  | -1.56173900 | C | 0.17549800  | 4.05254600  | -1.59289000 |
| H | 0.25479300  | 5.05157600  | -2.01095400 | H | 0.24127300  | 5.03508300  | -2.04962300 |
| C | -0.12655500 | 3.91579300  | -0.21076200 | C | -0.13884900 | 3.91224400  | -0.24108600 |
| H | -0.30832700 | 4.77460900  | 0.42596600  | H | -0.32332000 | 4.77548800  | 0.38884000  |
| C | -0.19379700 | 2.63779100  | 0.32658500  | C | -0.20320700 | 2.63827200  | 0.30619900  |
| H | -0.41063000 | 2.47914200  | 1.37392200  | H | -0.42058700 | 2.48740700  | 1.35458700  |
| C | -0.38034500 | -1.83926500 | -2.07074900 | C | -0.37342500 | -1.85943400 | -2.05468800 |
| H | -0.34869300 | -1.99465900 | -3.15520500 | H | -0.34205300 | -2.02347000 | -3.13788000 |
| C | 2.01759500  | -1.34701600 | -1.55644100 | C | 2.02277700  | -1.35133900 | -1.54653200 |
| H | 1.95371200  | -2.40299900 | -1.27400200 | H | 1.96433500  | -2.40577200 | -1.25723600 |
| H | 2.51955700  | -1.30157100 | -2.52893200 | H | 2.52419700  | -1.30988100 | -2.51947800 |
| C | 0.52861800  | 0.40342700  | -2.51285100 | C | 0.52399500  | 0.38375900  | -2.51581200 |
| H | -0.31520600 | 0.27547400  | -3.19900800 | H | -0.32243400 | 0.24747000  | -3.19714400 |
| H | 1.42540500  | 0.48041300  | -3.13598900 | H | 1.41785000  | 0.45820300  | -3.14344200 |
| N | 0.62104500  | -0.81577800 | -1.63589400 | N | 0.62350500  | -0.82772100 | -1.62907300 |
| O | -0.30754100 | 0.12100200  | 1.96617900  | O | -0.30853600 | 0.13345400  | 1.96581800  |
| O | -2.60008500 | 1.70482300  | 2.72473100  | O | -2.60593000 | 1.73442400  | 2.70172700  |
| C | -2.97930900 | 2.14655600  | 3.96865200  | C | -2.99887400 | 2.20430100  | 3.93090500  |
| H | -3.88216400 | 1.61921600  | 4.31821600  | H | -3.88879400 | 1.66505100  | 4.29533300  |
| H | -3.31052600 | 3.19866200  | 3.82782900  | H | -3.35660100 | 3.24278000  | 3.75759900  |



|   |             |             |             |   |             |             |             |
|---|-------------|-------------|-------------|---|-------------|-------------|-------------|
| H | -2.17494700 | 2.13017900  | 4.71480800  | H | -2.19605500 | 2.23113400  | 4.67842600  |
| H | -0.11947800 | -2.78802800 | -1.59300900 | H | -0.10768700 | -2.80303700 | -1.56947200 |
| N | 0.21609000  | -2.18562500 | 0.94132000  | N | 0.22588600  | -2.17866300 | 0.95947000  |
| C | 0.23924500  | -3.15636000 | 1.56928100  | C | 0.25453700  | -3.14424200 | 1.59510000  |
| C | 0.26580200  | -4.36977500 | 2.37377900  | C | 0.28787000  | -4.35085500 | 2.40951500  |
| H | -0.50803200 | -5.06545100 | 2.03392300  | H | -0.48163300 | -5.05389500 | 2.07502000  |
| H | 1.24423100  | -4.85435700 | 2.29549400  | H | 1.26920700  | -4.83022900 | 2.33570400  |
| H | 0.07851200  | -4.11254300 | 3.42176900  | H | 0.09846700  | -4.08611300 | 3.45525700  |
| H | -1.03168900 | 0.75602200  | 2.13620900  | H | -1.03443400 | 0.76804800  | 2.12898400  |

|           |                          |             |             |                           |                          |             |             |
|-----------|--------------------------|-------------|-------------|---------------------------|--------------------------|-------------|-------------|
| <b>13</b> |                          |             |             | <b>TS<sub>13-14</sub></b> |                          |             |             |
|           | Charge=2 Multiplicity =5 |             |             |                           | Charge=2 Multiplicity =1 |             |             |
| Fe        | 0.10841400               | 0.20493200  | 0.11986500  | N                         | -2.05113700              | -0.34840200 | 0.38174900  |
| N         | 1.82122800               | -0.61806500 | -0.57444400 | N                         | 1.85852800               | -0.40861700 | -0.32172900 |
| N         | -1.62952900              | 1.22376000  | 0.22869000  | N                         | -0.12185700              | 1.56455200  | -0.11241200 |
| N         | -0.94880200              | -1.58537100 | 0.68563300  | C                         | -2.66000900              | -0.78157200 | -0.74867600 |
| C         | 1.81096800               | -0.81487600 | -1.92167000 | C                         | -4.04121100              | -0.74149700 | -0.90069400 |
| C         | 2.86892700               | -1.43486200 | -2.57534100 | H                         | -4.49778700              | -1.09019800 | -1.82160000 |
| H         | 2.83039000               | -1.58497400 | -3.64961600 | C                         | -4.82202800              | -0.24950100 | 0.14736500  |
| C         | 3.97369800               | -1.85703500 | -1.83205300 | H                         | -5.90283000              | -0.21020800 | 0.05384800  |
| H         | 4.81059100               | -2.34303800 | -2.32407200 | C                         | -4.19136700              | 0.19702000  | 1.30781200  |
| C         | 3.97982200               | -1.65241500 | -0.45373200 | H                         | -4.75960300              | 0.59272800  | 2.14261800  |
| H         | 4.81500800               | -1.96870600 | 0.16144800  | C                         | -2.80350100              | 0.14036800  | 1.38635400  |
| C         | 2.88554700               | -1.03387100 | 0.14187100  | H                         | -2.25925900              | 0.48651500  | 2.25687500  |
| H         | 2.85872500               | -0.85973500 | 1.21036000  | C                         | 2.01210100               | -0.96239100 | -1.55306800 |
| C         | -2.37123600              | 1.18385200  | -0.90307700 | C                         | 3.25314100               | -1.05011800 | -2.17011900 |
| C         | -3.65879200              | 1.70714700  | -0.93939700 | H                         | 3.33802500               | -1.48850900 | -3.15957700 |
| H         | -4.24324800              | 1.66227400  | -1.85296800 | C                         | 4.37824200               | -0.56185300 | -1.50093800 |
| C         | -4.17886500              | 2.29736800  | 0.21559700  | H                         | 5.35948500               | -0.62349800 | -1.96122300 |
| H         | -5.18181300              | 2.71318600  | 0.20931500  | C                         | 4.21299000               | 0.02589600  | -0.24954400 |
| C         | -3.39975400              | 2.34457200  | 1.37200600  | H                         | 5.05258100               | 0.44377300  | 0.29528600  |
| H         | -3.77237400              | 2.79632300  | 2.28481900  | C                         | 2.93872900               | 0.09689500  | 0.30860900  |
| C         | -2.12516500              | 1.78832900  | 1.34398100  | H                         | 2.77769900               | 0.59983100  | 1.25811100  |
| H         | -1.46346700              | 1.76782600  | 2.20376000  | C                         | -0.37679700              | 1.85870200  | -1.40558700 |
| C         | -1.56654400              | -2.19282900 | -0.34453100 | C                         | -0.52727700              | 3.17021100  | -1.84667000 |
| C         | -2.49177900              | -3.21381700 | -0.14899200 | H                         | -0.73704600              | 3.37087200  | -2.89294600 |
| H         | -2.98190100              | -3.68451300 | -0.99561300 | C                         | -0.39423600              | 4.21297700  | -0.93128000 |
| C         | -2.76593600              | -3.62435400 | 1.15764700  | H                         | -0.50333800              | 5.24369400  | -1.25389300 |
| H         | -3.48022600              | -4.42146000 | 1.33981100  | C                         | -0.11151700              | 3.90731200  | 0.39913200  |
| C         | -2.11647300              | -2.99761300 | 2.22212400  | H                         | 0.01625900               | 4.68357200  | 1.14539200  |
| H         | -2.30668300              | -3.29067100 | 3.24888500  | C                         | 0.01190600               | 2.57488300  | 0.77275000  |
| C         | -1.21951800              | -1.97057200 | 1.94559000  | H                         | 0.24381600               | 2.30166000  | 1.79189500  |
| H         | -0.70235200              | -1.42087200 | 2.72486400  | C                         | -1.71738800              | -1.34723700 | -1.78019900 |

|   |             |             |             |    |             |             |             |
|---|-------------|-------------|-------------|----|-------------|-------------|-------------|
| C | 0.60584100  | -0.26747900 | -2.65166100 | H  | -2.12368000 | -1.27684600 | -2.79502500 |
| H | 0.42512900  | -0.80096100 | -3.59163600 | C  | 0.73659800  | -1.47178900 | -2.17868300 |
| C | -1.66551500 | 0.63916400  | -2.12517700 | H  | 0.55684900  | -2.50724600 | -1.87544900 |
| H | -1.18215100 | 1.47517500  | -2.64067100 | H  | 0.78303100  | -1.45417200 | -3.27327200 |
| H | -2.37116500 | 0.18856300  | -2.83070000 | C  | -0.43577100 | 0.69708600  | -2.36808600 |
| C | -1.09675500 | -1.76111200 | -1.71301700 | H  | -1.33168200 | 0.76110200  | -2.99345200 |
| H | -0.26119200 | -2.40884500 | -1.99987200 | H  | 0.42171700  | 0.75538500  | -3.04630900 |
| H | -1.87634900 | -1.89315900 | -2.47030800 | N  | -0.40198300 | -0.64131700 | -1.67095800 |
| N | -0.58883300 | -0.33998800 | -1.74702000 | H  | -1.54501900 | -2.40778100 | -1.57056500 |
| O | 0.53123800  | 0.65839600  | 1.78111500  | N  | 0.02846200  | -2.28829600 | 0.70906600  |
| O | 3.06663900  | 0.28097300  | 3.09152500  | C  | 0.11257600  | -3.38911300 | 1.06122800  |
| C | 3.47584800  | 0.80750700  | 4.29159300  | C  | 0.21929600  | -4.77397200 | 1.50166400  |
| H | 4.57302400  | 0.89412800  | 4.33803900  | H  | -0.62333700 | -5.02557900 | 2.15423700  |
| H | 3.21827700  | 0.04038200  | 5.05487700  | H  | 0.21061200  | -5.44488500 | 0.63618200  |
| H | 2.97098100  | 1.74325800  | 4.56422100  | H  | 1.15465400  | -4.91854700 | 2.05261900  |
| H | 0.78115600  | 0.78474700  | -2.89023600 | Fe | -0.04219800 | -0.36071600 | 0.30637700  |
| N | 0.94282300  | 2.25839900  | -0.84056300 | O  | 0.04130400  | -0.07009500 | 2.15057700  |
| C | 1.40222600  | 3.32350300  | -0.85611800 | H  | -0.06807000 | -0.90531100 | 2.63957400  |
| C | 1.97684300  | 4.66306900  | -0.87944500 | H  | 1.00082600  | 0.49979700  | 2.97391700  |
| H | 3.03851100  | 4.61128800  | -1.14080100 | C  | 1.90774300  | 1.05069400  | 3.71795300  |
| H | 1.45817300  | 5.28097600  | -1.61939100 | O  | 2.37088400  | 1.89593000  | 2.85175500  |
| H | 1.87452800  | 5.12840700  | 0.10616300  | H  | 2.53744300  | 0.18021100  | 3.98722200  |
| H | 1.44812400  | 0.57403000  | 2.11844400  | H  | 1.30089000  | 1.44212000  | 4.55513000  |

|                           |             |             |             |                           |             |             |             |
|---------------------------|-------------|-------------|-------------|---------------------------|-------------|-------------|-------------|
| <b>TS<sub>13-14</sub></b> |             |             |             | <b>TS<sub>13-14</sub></b> |             |             |             |
| Charge=2 Multiplicity =3  |             |             |             | Charge=2 Multiplicity =5  |             |             |             |
| N                         | 2.13131000  | -0.14363700 | 0.36854800  | N                         | 0.03603400  | -0.04381500 | -0.03260300 |
| N                         | -1.65498700 | 0.84421800  | -0.33868300 | N                         | -0.00866900 | -0.03626500 | 4.14286400  |
| N                         | -0.35562100 | -1.53324900 | -0.08956500 | N                         | 2.20404200  | 0.05194900  | 2.30947400  |
| C                         | 2.82691300  | 0.13592400  | -0.76183400 | C                         | -0.31058000 | -1.31169800 | -0.35637400 |
| C                         | 4.17213000  | -0.19243200 | -0.88663400 | C                         | -0.35435000 | -1.74036100 | -1.67869700 |
| H                         | 4.70368600  | 0.03398300  | -1.80560600 | H                         | -0.62714100 | -2.76437800 | -1.91384200 |
| C                         | 4.82069800  | -0.81569100 | 0.18215600  | C                         | -0.03989600 | -0.83133300 | -2.69247700 |
| H                         | 5.87105200  | -1.07923400 | 0.10616500  | H                         | -0.06740300 | -1.14279700 | -3.73217900 |
| C                         | 4.09757600  | -1.10467600 | 1.33874600  | C                         | 0.31961200  | 0.47326100  | -2.35294500 |
| H                         | 4.56097000  | -1.59655900 | 2.18704500  | H                         | 0.57799000  | 1.20328400  | -3.11226900 |
| C                         | 2.75079300  | -0.76052700 | 1.39292800  | C                         | 0.35112500  | 0.82884400  | -1.00854800 |
| H                         | 2.13707100  | -0.97249600 | 2.26095900  | H                         | 0.63280300  | 1.82501600  | -0.68378200 |
| C                         | -1.70279700 | 1.24471300  | -1.63395400 | C                         | -0.16534100 | -1.34227000 | 4.45550300  |
| C                         | -2.90753300 | 1.54629900  | -2.25709500 | C                         | -0.07952000 | -1.79583800 | 5.76710700  |
| H                         | -2.91865500 | 1.85634800  | -3.29734900 | H                         | -0.20322800 | -2.85058600 | 5.99205800  |
| C                         | -4.09348500 | 1.44317200  | -1.52526800 | C                         | 0.16643700  | -0.86966800 | 6.78433300  |
| H                         | -5.04563800 | 1.67693500  | -1.99143700 | H                         | 0.23525500  | -1.19885200 | 7.81666200  |

|    |             |             |             |    |             |             |            |
|----|-------------|-------------|-------------|----|-------------|-------------|------------|
| C  | -4.03495100 | 1.01995800  | -0.19943400 | C  | 0.33727500  | 0.47429600  | 6.45510900 |
| H  | -4.93188300 | 0.90619200  | 0.39961100  | H  | 0.54641700  | 1.22013600  | 7.21420100 |
| C  | -2.79742900 | 0.71758600  | 0.36360200  | C  | 0.25317100  | 0.85442200  | 5.11839700 |
| H  | -2.72135700 | 0.33453300  | 1.37852400  | H  | 0.42970100  | 1.88166100  | 4.81149800 |
| C  | -0.19585900 | -1.94380400 | -1.36729900 | C  | 2.57159000  | -1.24827500 | 2.32907300 |
| C  | -0.58146900 | -3.21437300 | -1.78459800 | C  | 3.85910700  | -1.64545400 | 2.67798000 |
| H  | -0.44053300 | -3.50970900 | -2.81998100 | H  | 4.12248300  | -2.69865700 | 2.68922900 |
| C  | -1.14963200 | -4.09114300 | -0.86211800 | C  | 4.80142300  | -0.66982000 | 3.00686900 |
| H  | -1.45629000 | -5.08672200 | -1.16741000 | H  | 5.81286200  | -0.95544300 | 3.27915800 |
| C  | -1.33087700 | -3.65773500 | 0.44988800  | C  | 4.41867900  | 0.67050600  | 2.99383400 |
| H  | -1.79154000 | -4.29059300 | 1.20031500  | H  | 5.11204200  | 1.46096000  | 3.25928900 |
| C  | -0.92827100 | -2.37439200 | 0.79853100  | C  | 3.10948500  | 0.99007400  | 2.64959400 |
| H  | -1.11021600 | -1.99319500 | 1.79354400  | H  | 2.76333200  | 2.01593400  | 2.68692300 |
| C  | 2.03317600  | 0.84471000  | -1.83759300 | C  | -0.67686200 | -2.18853600 | 0.82049500 |
| H  | 2.45039800  | 0.66098800  | -2.83438700 | H  | -0.52777500 | -3.25095400 | 0.59374300 |
| C  | -0.36090800 | 1.38537300  | -2.31915000 | C  | -0.51047300 | -2.24775500 | 3.29366100 |
| H  | 0.03631600  | 2.38873300  | -2.13330500 | H  | -1.59559100 | -2.22645200 | 3.14615100 |
| H  | -0.45129000 | 1.26988300  | -3.40516200 | H  | -0.23424300 | -3.28777000 | 3.50069600 |
| C  | 0.44438100  | -0.97146500 | -2.32999100 | C  | 1.54085000  | -2.25202100 | 1.86642600 |
| H  | 1.43204500  | -1.34934600 | -2.61424800 | H  | 1.70844500  | -2.44235900 | 0.80072200 |
| H  | -0.14143500 | -0.91305700 | -3.25345600 | H  | 1.66877000  | -3.21072100 | 2.38061000 |
| N  | 0.60966400  | 0.40277500  | -1.74820100 | N  | 0.12088700  | -1.77626500 | 2.01848500 |
| H  | 2.06432100  | 1.92490100  | -1.66523500 | H  | -1.73567300 | -2.04903300 | 1.05941800 |
| N  | 0.65939100  | 2.22498000  | 0.62004000  | N  | -2.09957500 | 0.54740600  | 2.02446800 |
| C  | 0.85169600  | 3.33106600  | 0.90583500  | C  | -3.23283200 | 0.78705600  | 2.08720200 |
| C  | 1.09295200  | 4.72101500  | 1.26901700  | C  | -4.65644600 | 1.08705100  | 2.16607000 |
| H  | 2.04820600  | 4.81014900  | 1.79690800  | H  | -4.97945100 | 1.60606200  | 1.25762800 |
| H  | 1.12337100  | 5.34442900  | 0.36919600  | H  | -5.22965600 | 0.15991100  | 2.26932100 |
| H  | 0.28855000  | 5.07877900  | 1.92055700  | H  | -4.85433200 | 1.72625900  | 3.03284900 |
| Fe | 0.18262100  | 0.33634100  | 0.29577600  | Fe | 0.11617700  | 0.33134800  | 2.04541800 |
| O  | -0.13216700 | 0.21803500  | 2.17175700  | O  | 0.16563900  | 2.19386900  | 1.98619500 |
| H  | 0.34632600  | 0.92508700  | 2.64142000  | H  | -0.71198300 | 2.55612700  | 1.76327000 |
| H  | -0.93969800 | -0.20392800 | 3.13697100  | H  | 0.80764600  | 3.42589300  | 2.47684400 |
| C  | -1.90756200 | -0.58323400 | 3.97115600  | C  | 1.31096600  | 4.36253100  | 3.12436200 |
| O  | -2.69782300 | -1.05461800 | 3.06486900  | O  | 1.89811500  | 3.64789200  | 4.04645600 |
| H  | -2.16942900 | 0.37745400  | 4.45368300  | H  | 0.43164700  | 4.95970200  | 3.42701500 |
| H  | -1.37811200 | -1.29342100 | 4.63319700  | H  | 1.95538200  | 4.85690900  | 2.37472800 |

|                          |             |             |             |                          |             |             |             |
|--------------------------|-------------|-------------|-------------|--------------------------|-------------|-------------|-------------|
| <b>14</b>                |             |             |             | <b>14</b>                |             |             |             |
| Charge=2 Multiplicity =1 |             |             |             | Charge=2 Multiplicity =3 |             |             |             |
| N                        | -1.81841700 | -0.52778000 | -0.46164100 | N                        | -2.07332500 | -0.32141000 | 0.12686600  |
| N                        | 2.00744300  | -0.25138600 | 0.59566000  | N                        | 1.97817100  | -0.59715500 | 0.25654000  |
| N                        | 0.16115700  | 1.52581800  | -0.39996200 | N                        | 0.12120100  | 1.12350600  | -1.02373800 |

|    |             |             |             |    |             |             |             |
|----|-------------|-------------|-------------|----|-------------|-------------|-------------|
| C  | -1.84395700 | -1.23633200 | -1.62016100 | C  | -2.46488800 | -1.34652200 | -0.66432300 |
| C  | -3.01734900 | -1.44901700 | -2.33503500 | C  | -3.79596100 | -1.51195200 | -1.03888300 |
| H  | -2.99396200 | -2.01249800 | -3.26263800 | H  | -4.07785400 | -2.33912200 | -1.68306300 |
| C  | -4.21572300 | -0.92942100 | -1.84238300 | C  | -4.75300100 | -0.60836400 | -0.57538500 |
| H  | -5.14524400 | -1.08497800 | -2.38095000 | H  | -5.79573500 | -0.72131800 | -0.85539700 |
| C  | -4.19092100 | -0.19970900 | -0.65616600 | C  | -4.34587900 | 0.44222400  | 0.24592800  |
| H  | -5.09521500 | 0.23159200  | -0.24074600 | H  | -5.05467400 | 1.16969300  | 0.62636500  |
| C  | -2.97598900 | -0.01598800 | -0.00155000 | C  | -2.99751300 | 0.55200200  | 0.56877700  |
| H  | -2.92495300 | 0.56287200  | 0.91343100  | H  | -2.63059300 | 1.35549600  | 1.19931100  |
| C  | 2.72700600  | -0.79870600 | -0.41491400 | C  | 2.27896800  | -1.64374000 | -0.54573300 |
| C  | 4.11629800  | -0.74340500 | -0.44705500 | C  | 3.59708700  | -1.97011100 | -0.85511900 |
| H  | 4.65993700  | -1.18495000 | -1.27646100 | H  | 3.80679900  | -2.81069800 | -1.50936700 |
| C  | 4.79375800  | -0.11748200 | 0.60100500  | C  | 4.63404800  | -1.21011300 | -0.31290000 |
| H  | 5.87796600  | -0.06479600 | 0.59997500  | H  | 5.66787900  | -1.44997900 | -0.54119900 |
| C  | 4.05394800  | 0.44285900  | 1.64094400  | C  | 4.31913100  | -0.13776200 | 0.52090500  |
| H  | 4.53893300  | 0.94353400  | 2.47195500  | H  | 5.09260700  | 0.48093100  | 0.96280900  |
| C  | 2.66529000  | 0.36322700  | 1.59613700  | C  | 2.97994200  | 0.13753300  | 0.77539000  |
| H  | 2.04590800  | 0.80195900  | 2.37055300  | H  | 2.68339800  | 0.96543100  | 1.41143700  |
| C  | 0.51943100  | 1.63639700  | -1.69650900 | C  | 0.13880600  | 0.64232200  | -2.28732100 |
| C  | 0.74025700  | 2.87037100  | -2.30518100 | C  | 0.28488300  | 1.48158300  | -3.39204600 |
| H  | 1.03202700  | 2.91544000  | -3.35005300 | H  | 0.29667400  | 1.05531000  | -4.39086500 |
| C  | 0.57898600  | 4.03452500  | -1.55822500 | C  | 0.41141200  | 2.85385600  | -3.20381600 |
| H  | 0.74317000  | 5.00716000  | -2.01120200 | H  | 0.52509100  | 3.51959800  | -4.05363200 |
| C  | 0.20773300  | 3.92297400  | -0.21795900 | C  | 0.38846500  | 3.35057400  | -1.90080100 |
| H  | 0.07496500  | 4.80037000  | 0.40557300  | H  | 0.48204100  | 4.41140200  | -1.69640800 |
| C  | 0.01687800  | 2.65778000  | 0.32106000  | C  | 0.24500700  | 2.45905100  | -0.84757000 |
| H  | -0.25059200 | 2.53251800  | 1.36285300  | H  | 0.22779800  | 2.82345900  | 0.17073300  |
| C  | -0.50593000 | -1.79534800 | -2.04940800 | C  | -1.38111600 | -2.32947200 | -1.07228900 |
| H  | -0.46216900 | -1.95554400 | -3.13321800 | H  | -1.68191600 | -2.87740700 | -1.97533000 |
| C  | 1.90295700  | -1.52154700 | -1.45672400 | C  | 1.10542300  | -2.47655100 | -1.03210300 |
| H  | 1.73429300  | -2.55098400 | -1.12444500 | H  | 0.86193300  | -3.21673800 | -0.26162200 |
| H  | 2.42099000  | -1.57233600 | -2.42121000 | H  | 1.38275400  | -3.03653300 | -1.93522100 |
| C  | 0.62244300  | 0.34687500  | -2.47268000 | C  | -0.02785500 | -0.85022100 | -2.49944000 |
| H  | -0.21049700 | 0.29596200  | -3.18165200 | H  | -0.94512100 | -1.01776300 | -3.07637500 |
| H  | 1.53908900  | 0.32863200  | -3.07139400 | H  | 0.79215100  | -1.21649400 | -3.12887800 |
| N  | 0.56597000  | -0.86553900 | -1.58200700 | N  | -0.08894900 | -1.63398300 | -1.24293600 |
| H  | -0.34102800 | -2.76391500 | -1.56859700 | H  | -1.26134600 | -3.07092000 | -0.27452600 |
| N  | -0.02717600 | -2.12950300 | 0.98228100  | N  | -0.17102100 | -1.45615600 | 1.90238000  |
| C  | -0.07446300 | -3.17432900 | 1.48632800  | C  | -0.24557000 | -2.20231300 | 2.78770200  |
| C  | -0.13481700 | -4.49246900 | 2.10790300  | C  | -0.34023300 | -3.14476100 | 3.89613500  |
| H  | -1.09684400 | -4.62807100 | 2.61291600  | H  | -1.26171000 | -2.97048400 | 4.46130900  |
| H  | -0.02601600 | -5.27195000 | 1.34641600  | H  | -0.34919700 | -4.17189100 | 3.51654800  |
| H  | 0.67121800  | -4.60258700 | 2.84074200  | H  | 0.51727700  | -3.02544800 | 4.56648700  |
| Fe | 0.03971400  | -0.33273400 | 0.27659900  | Fe | -0.03589600 | -0.17704800 | 0.47195000  |

|   |             |             |            |   |             |            |            |
|---|-------------|-------------|------------|---|-------------|------------|------------|
| O | -0.38405400 | 0.27576500  | 2.20110100 | O | 0.00193700  | 1.27746800 | 2.12970100 |
| H | -0.29236400 | -0.44869800 | 2.84048200 | H | -0.06343400 | 0.89325300 | 3.01691000 |
| H | -1.18938300 | 0.77808800  | 2.48363700 | H | 0.06075700  | 2.25662200 | 2.25324300 |
| C | -3.01230800 | 2.27903100  | 3.93520300 | C | 0.20215600  | 4.95587200 | 2.98748500 |
| O | -2.61602100 | 1.69127800  | 2.94304400 | O | 0.18194700  | 4.01311400 | 2.21624100 |
| H | -4.00524500 | 2.75511800  | 3.95152700 | H | 0.29626400  | 5.98926500 | 2.61741500 |
| H | -2.40096800 | 2.35981800  | 4.84966400 | H | 0.12795500  | 4.82048600 | 4.07976300 |

| <b>14</b>                |             |             |             | <b>15</b>                |             |             |             |
|--------------------------|-------------|-------------|-------------|--------------------------|-------------|-------------|-------------|
| Charge=2 Multiplicity =5 |             |             |             | Charge=2 Multiplicity =1 |             |             |             |
| N                        | -1.57139800 | -1.30814700 | 0.42517300  | Fe                       | 0.01633200  | -0.44541700 | -0.57717500 |
| N                        | 2.23591400  | 0.45099400  | -0.19160200 | N                        | 1.97017500  | -0.33826000 | -0.26743900 |
| N                        | -0.81582400 | 1.28446000  | -0.83348900 | N                        | -1.94740900 | -0.64031000 | -0.32385000 |
| C                        | -1.66929200 | -2.15594100 | -0.62060200 | N                        | -0.14134600 | 1.49653300  | -0.37667700 |
| C                        | -2.84845100 | -2.84475500 | -0.89679600 | C                        | 2.37346100  | -0.61246100 | 0.99961500  |
| H                        | -2.90084200 | -3.51538800 | -1.74887100 | C                        | -2.34479100 | -0.91935300 | 0.94541600  |
| C                        | -3.95151400 | -2.66448000 | -0.06120200 | C                        | -0.19665300 | 1.98615400  | 0.87923200  |
| H                        | -4.87925300 | -3.19331400 | -0.25724900 | C                        | 1.27678000  | -1.07777500 | 1.93256800  |
| C                        | -3.84509200 | -1.79445500 | 1.02383900  | H                        | 1.52043900  | -0.87013600 | 2.98036400  |
| H                        | -4.67860000 | -1.62601000 | 1.69704700  | C                        | -1.22296800 | -1.21117000 | 1.91959500  |
| C                        | -2.63893000 | -1.13212000 | 1.22517100  | H                        | -0.96809500 | -2.27449300 | 1.86688400  |
| H                        | -2.50818500 | -0.43467100 | 2.04736600  | H                        | -1.52166700 | -1.00120500 | 2.95244300  |
| C                        | 2.73209600  | -0.29508500 | -1.20367800 | C                        | -0.08248400 | 0.99055700  | 2.00986700  |
| C                        | 3.96737400  | -0.01392700 | -1.78262600 | H                        | -0.93253800 | 1.10264900  | 2.69078800  |
| H                        | 4.33685000  | -0.62414800 | -2.60095200 | N                        | -0.00985000 | -0.43145400 | 1.52747100  |
| C                        | 4.71725000  | 1.05797500  | -1.29573700 | O                        | 0.03257600  | -0.38823700 | -2.19380800 |
| H                        | 5.68280000  | 1.29388100  | -1.73257400 | H                        | 1.15328600  | -2.16038600 | 1.83193200  |
| C                        | 4.20487000  | 1.82403600  | -0.24885900 | H                        | -0.77738000 | -2.79312500 | -0.84945600 |
| H                        | 4.75320900  | 2.66833600  | 0.15455900  | O                        | 0.10145800  | -2.47867700 | -0.57446200 |
| C                        | 2.95904700  | 1.48792300  | 0.27024200  | C                        | 1.08311300  | -3.19340500 | -1.40007000 |
| H                        | 2.51395400  | 2.05684100  | 1.08111600  | H                        | 2.06243700  | -2.98036100 | -0.97752800 |
| C                        | -0.92950400 | 0.86508600  | -2.11103600 | H                        | 0.87252900  | -4.26176300 | -1.32981900 |
| C                        | -1.79165300 | 1.48140100  | -3.01751100 | C                        | -2.87055400 | -0.43275600 | -1.28590100 |
| H                        | -1.86450500 | 1.11238800  | -4.03604800 | C                        | -3.69246400 | -0.99054700 | 1.27887600  |
| C                        | -2.54475800 | 2.57827100  | -2.60281000 | C                        | -4.23304000 | -0.50413800 | -1.01816100 |
| H                        | -3.21978600 | 3.07401200  | -3.29374700 | H                        | -2.48281200 | -0.21270300 | -2.27458900 |
| C                        | -2.41229400 | 3.02608200  | -1.28888800 | C                        | -4.65098500 | -0.78314400 | 0.28326000  |
| H                        | -2.97233600 | 3.88018900  | -0.92397200 | H                        | -3.98845900 | -1.20989200 | 2.29990100  |
| C                        | -1.54524000 | 2.34805900  | -0.43970400 | H                        | -4.94660300 | -0.33829200 | -1.81797600 |
| H                        | -1.42282700 | 2.66828700  | 0.58958800  | H                        | -5.70825400 | -0.83681900 | 0.52402100  |
| C                        | -0.40012600 | -2.38533300 | -1.41975400 | H                        | -0.16581700 | 1.88023000  | -2.40824200 |
| H                        | -0.64105800 | -2.77867100 | -2.41627900 | C                        | -0.21582500 | 2.34224600  | -1.42958200 |
| C                        | 1.88783700  | -1.48052000 | -1.63288800 | C                        | -0.34849600 | 3.71242400  | -1.25727000 |

|    |             |             |             |   |             |             |             |
|----|-------------|-------------|-------------|---|-------------|-------------|-------------|
| H  | 2.10871900  | -2.32592200 | -0.97176300 | C | -0.41015000 | 4.22840700  | 0.03865400  |
| H  | 2.15338900  | -1.79208500 | -2.65213200 | H | -0.40350700 | 4.35773700  | -2.12721300 |
| C  | 0.00307700  | -0.23770900 | -2.57451200 | C | -0.33363200 | 3.35175500  | 1.11878800  |
| H  | -0.45060100 | -0.79238200 | -3.40528700 | H | -0.51585000 | 5.29582600  | 0.20572100  |
| H  | 0.89738100  | 0.24855300  | -2.98123000 | H | -0.37691000 | 3.71951000  | 2.13949500  |
| N  | 0.44362700  | -1.16994200 | -1.50197500 | H | 4.01200100  | -0.74002000 | 2.38517800  |
| H  | 0.18202800  | -3.16051200 | -0.90813700 | C | 3.71143700  | -0.51995700 | 1.36565100  |
| N  | 1.16905000  | -1.61635200 | 1.83025000  | C | 4.65449500  | -0.14722900 | 0.40420500  |
| C  | 1.64189700  | -2.42250400 | 2.51769600  | C | 4.22961100  | 0.13013900  | -0.89518200 |
| C  | 2.23544300  | -3.43545600 | 3.38211800  | H | 5.70441500  | -0.07197000 | 0.66994200  |
| H  | 1.48295800  | -3.82035300 | 4.07794700  | C | 2.87564900  | 0.02999400  | -1.19569800 |
| H  | 2.61865100  | -4.26552200 | 2.77991600  | H | 4.93073300  | 0.42324500  | -1.66904400 |
| H  | 3.06188300  | -3.00189900 | 3.95442500  | H | 2.48407100  | 0.23159100  | -2.18650300 |
| Fe | 0.24411200  | -0.10443000 | 0.47620100  | H | 0.81368000  | 1.21412200  | 2.59818800  |
| O  | 0.03525500  | 0.94478700  | 2.31531900  | H | 1.02138000  | -2.84158900 | -2.43148800 |
| H  | 0.37451400  | 0.52558900  | 3.12064600  |   |             |             |             |
| H  | -0.35306900 | 1.81672000  | 2.57805300  |   |             |             |             |
| C  | -1.30085100 | 4.15654800  | 3.74184000  |   |             |             |             |
| O  | -1.15157900 | 3.34951000  | 2.84129300  |   |             |             |             |
| H  | -1.88381200 | 5.07795900  | 3.58587300  |   |             |             |             |
| H  | -0.86448100 | 4.00325500  | 4.74326900  |   |             |             |             |

|                          |             |             |             |                          |             |             |             |
|--------------------------|-------------|-------------|-------------|--------------------------|-------------|-------------|-------------|
| <b>15</b>                |             |             |             | <b>15</b>                |             |             |             |
| Charge=2 Multiplicity =3 |             |             |             | Charge=2 Multiplicity =5 |             |             |             |
| Fe                       | 0.01192800  | -0.44490900 | -0.57790900 | Fe                       | 0.08577400  | -0.00117600 | 0.40961100  |
| N                        | 1.96765200  | -0.35183600 | -0.26845600 | N                        | -0.60114000 | 1.79476600  | -0.21494400 |
| N                        | -1.95308300 | -0.62561700 | -0.32208600 | N                        | -0.91043800 | -1.58434300 | -0.35622600 |
| N                        | -0.12548600 | 1.49926700  | -0.37747500 | N                        | 2.02052400  | -0.16822700 | 0.96896100  |
| C                        | 2.36814500  | -0.62523000 | 0.99985800  | C                        | -0.40884200 | 2.05353100  | -1.53532500 |
| C                        | -2.35211000 | -0.90502400 | 0.94668100  | C                        | -0.37357000 | -2.09190100 | -1.49873600 |
| C                        | -0.17794400 | 1.98951200  | 0.87829500  | C                        | 2.93136900  | 0.02194400  | -0.02184200 |
| C                        | 1.26849000  | -1.08320100 | 1.93328000  | C                        | 0.12392200  | 0.89356200  | -2.34909300 |
| H                        | 1.51477800  | -0.87760200 | 2.98092100  | H                        | 0.69924900  | 1.23315000  | -3.21771200 |
| C                        | -1.23229900 | -1.20160500 | 1.92212000  | C                        | 0.90924100  | -1.43331300 | -1.95540500 |
| H                        | -0.98389100 | -2.26660400 | 1.87159400  | H                        | 1.02954500  | -1.48731500 | -3.04359500 |
| H                        | -1.53041500 | -0.98806100 | 2.95439100  | H                        | 1.76634800  | -1.95026400 | -1.50792300 |
| C                        | -0.07962600 | 0.99344500  | 2.01013000  | C                        | 2.35347700  | 0.48638300  | -1.33969700 |
| H                        | -0.93486900 | 1.11220900  | 2.68340300  | H                        | 2.96841000  | 0.17199600  | -2.19077300 |
| N                        | -0.01448300 | -0.42944700 | 1.52983500  | N                        | 0.94912400  | -0.01064200 | -1.48592000 |
| O                        | 0.02575000  | -0.38938800 | -2.19278900 | O                        | -0.52782700 | 0.00435300  | 1.89677400  |
| H                        | 1.13825800  | -2.16502500 | 1.83255700  | H                        | -0.72123600 | 0.30707200  | -2.72750800 |
| H                        | -0.80302900 | -2.78790700 | -0.83839200 | H                        | -4.61522000 | -0.09804500 | 1.65495200  |
| O                        | 0.08037400  | -2.47966100 | -0.57108500 | O                        | -3.68813600 | -0.12222600 | 1.94004800  |

|   |             |             |             |   |             |             |             |
|---|-------------|-------------|-------------|---|-------------|-------------|-------------|
| C | 1.04976200  | -3.20538900 | -1.40155700 | C | -3.67843000 | -0.00025100 | 3.37053900  |
| H | 2.03460300  | -2.99125800 | -0.99282500 | H | -2.63084700 | -0.02249900 | 3.67656800  |
| H | 0.83653000  | -4.27229500 | -1.31809400 | H | -4.12457100 | 0.94707000  | 3.69761400  |
| C | -2.87452500 | -0.41492400 | -1.28495100 | C | -2.03743100 | -2.11982100 | 0.16515700  |
| C | -3.70034800 | -0.97352000 | 1.27852600  | C | -0.95441500 | -3.17023500 | -2.14997100 |
| C | -4.23747700 | -0.48349900 | -1.01870600 | C | -2.65445100 | -3.21086700 | -0.43892900 |
| H | -2.48457600 | -0.19570400 | -2.27295400 | H | -2.45390600 | -1.62501700 | 1.04106500  |
| C | -4.65729400 | -0.76298300 | 0.28204400  | C | -2.10672400 | -3.74600200 | -1.60396300 |
| H | -3.99799600 | -1.19333300 | 2.29898700  | H | -0.51609800 | -3.55870900 | -3.06383200 |
| H | -4.94987500 | -0.31529900 | -1.81904800 | H | -3.55537100 | -3.62467500 | 0.00072700  |
| H | -5.71491700 | -0.81479600 | 0.52167800  | H | -2.57340000 | -4.59523900 | -2.09382100 |
| H | -0.14345200 | 1.88212100  | -2.40944200 | H | 1.64969600  | -0.62821400 | 2.95248800  |
| C | -0.19082800 | 2.34485800  | -1.43108300 | C | 2.43193100  | -0.50061800 | 2.21229900  |
| C | -0.31134800 | 3.71625800  | -1.25913100 | C | 3.77884200  | -0.66356200 | 2.51069000  |
| C | -0.36948200 | 4.23335200  | 0.03650800  | C | 4.72034200  | -0.48325000 | 1.49622600  |
| H | -0.35971100 | 4.36163400  | -2.12941900 | H | 4.07796100  | -0.92942400 | 3.51864800  |
| C | -0.30180100 | 3.35652900  | 1.11707800  | C | 4.29075800  | -0.13732500 | 0.21105000  |
| H | -0.46565700 | 5.30176600  | 0.20297900  | H | 5.77933500  | -0.61026700 | 1.69936700  |
| H | -0.34266100 | 3.72490000  | 2.13766300  | H | 5.00428000  | 0.01244700  | -0.59301400 |
| H | 4.00498800  | -0.75758800 | 2.38690000  | H | -0.59602600 | 3.47324700  | -3.13991700 |
| C | 3.70627300  | -0.53872600 | 1.36656900  | C | -0.76299000 | 3.27819700  | -2.08530100 |
| C | 4.65203000  | -0.17336000 | 0.40492500  | C | -1.34535900 | 4.24601800  | -1.26037000 |
| C | 4.22981000  | 0.10300700  | -0.89546700 | C | -1.55740900 | 3.96266200  | 0.08958300  |
| H | 5.70209200  | -0.10290900 | 0.67140500  | H | -1.63030900 | 5.20963600  | -1.67160500 |
| C | 2.87553600  | 0.00906800  | -1.19694500 | C | -1.17021900 | 2.72308600  | 0.58349200  |
| H | 4.93313500  | 0.39047600  | -1.66943200 | H | -2.01209400 | 4.68888500  | 0.75434800  |
| H | 2.48546600  | 0.21023700  | -2.18844300 | H | -1.30628900 | 2.43719400  | 1.62034400  |
| H | 0.81312500  | 1.21067400  | 2.60600900  | H | 2.31976800  | 1.58230500  | -1.35057900 |
| H | 0.97696800  | -2.86358500 | -2.43560200 | H | -4.20838700 | -0.83010000 | 3.85417100  |

|                           |             |             |             |                           |             |             |             |
|---------------------------|-------------|-------------|-------------|---------------------------|-------------|-------------|-------------|
| <b>TS<sub>15-16</sub></b> |             |             |             | <b>TS<sub>15-16</sub></b> |             |             |             |
| Charge=2 Multiplicity =1  |             |             |             | Charge=2 Multiplicity =3  |             |             |             |
| Fe                        | 0.06801000  | -0.48055200 | -0.47438200 | Fe                        | 0.06726100  | -0.48477600 | -0.47692100 |
| N                         | 2.02540100  | -0.32229800 | -0.19526000 | N                         | 2.02368800  | -0.31440800 | -0.19826600 |
| N                         | -1.88364200 | -0.74977500 | -0.20345800 | N                         | -1.88538400 | -0.74723000 | -0.20898400 |
| N                         | -0.20324600 | 1.45030000  | -0.44903400 | N                         | -0.20596100 | 1.44764700  | -0.44771800 |
| C                         | 2.44406300  | -0.54354200 | 1.07631500  | C                         | 2.44256900  | -0.54523300 | 1.07176300  |
| C                         | -2.27782500 | -0.89603000 | 1.08733600  | C                         | -2.27922500 | -0.90071100 | 1.08112000  |
| C                         | -0.27263200 | 2.02636200  | 0.76941200  | C                         | -0.27259800 | 2.01905300  | 0.77327700  |
| C                         | 1.34768400  | -0.96468700 | 2.02620600  | C                         | 1.34740300  | -0.97439800 | 2.01985900  |
| H                         | 1.58330300  | -0.71195900 | 3.06602200  | H                         | 1.58280800  | -0.72602400 | 3.06076700  |
| C                         | -1.14650300 | -1.04871100 | 2.07888000  | C                         | -1.14717600 | -1.06408600 | 2.07014100  |
| H                         | -0.88899900 | -2.11016400 | 2.17214900  | H                         | -0.88906800 | -2.12635200 | 2.15291200  |

|   |             |             |             |   |             |             |             |
|---|-------------|-------------|-------------|---|-------------|-------------|-------------|
| H | -1.43335400 | -0.70631400 | 3.07880900  | H | -1.43280500 | -0.73175800 | 3.07391600  |
| C | 0.04232800  | 1.13722500  | 1.94978200  | C | 0.03806600  | 1.12504300  | 1.95134900  |
| H | -0.67015900 | 1.30439500  | 2.76373700  | H | -0.67761300 | 1.28862000  | 2.76322500  |
| N | 0.06653900  | -0.32485900 | 1.58126200  | N | 0.06480000  | -0.33562500 | 1.57807000  |
| O | 0.09770200  | -0.54996400 | -2.21788700 | O | 0.09491800  | -0.55783000 | -2.21076400 |
| H | 1.21837300  | -2.05033300 | 1.96906500  | H | 1.22052000  | -2.06002400 | 1.95810600  |
| H | -0.54925500 | -2.99778700 | -0.50152800 | H | -0.54411200 | -2.99651600 | -0.50423600 |
| O | 0.30471600  | -2.54357000 | -0.60937500 | O | 0.30974000  | -2.54150800 | -0.61190500 |
| C | 0.79767400  | -2.82931100 | -1.92196200 | C | 0.81361200  | -2.84610600 | -1.91335600 |
| H | 1.88485600  | -2.85066700 | -1.92012700 | H | 1.90054100  | -2.84890000 | -1.91005700 |
| H | 0.30526100  | -3.67800600 | -2.39300800 | H | 0.32735400  | -3.70083600 | -2.37864000 |
| H | 0.44615600  | -1.66161300 | -2.49614000 | H | 0.43937700  | -1.63457200 | -2.49480200 |
| C | -2.81059000 | -0.67627200 | -1.18160900 | C | -2.81316700 | -0.66190700 | -1.18513700 |
| C | -3.62261100 | -0.97195000 | 1.43024000  | C | -3.62398400 | -0.97217800 | 1.42518500  |
| C | -4.17099700 | -0.76081300 | -0.90627200 | C | -4.17370100 | -0.74083200 | -0.90900500 |
| H | -2.42520200 | -0.54664800 | -2.18703100 | H | -2.42852800 | -0.52736200 | -2.19018800 |
| C | -4.58408600 | -0.90640600 | 0.41836600  | C | -4.58628300 | -0.89416800 | 0.41493500  |
| H | -3.91426200 | -1.08503500 | 2.46967900  | H | -3.91487500 | -1.09106000 | 2.46417300  |
| H | -4.88760500 | -0.70469800 | -1.71848700 | H | -4.89084500 | -0.67489000 | -1.72001000 |
| H | -5.63985700 | -0.96517600 | 0.66436600  | H | -5.64210300 | -0.94918000 | 0.66156900  |
| H | -0.32831000 | 1.67194600  | -2.49964800 | H | -0.33277500 | 1.68038900  | -2.49748800 |
| C | -0.39904300 | 2.19963200  | -1.55499600 | C | -0.39997600 | 2.20323000  | -1.55021600 |
| C | -0.67155700 | 3.55936200  | -1.47777300 | C | -0.66756600 | 3.56357800  | -1.46622400 |
| C | -0.75648200 | 4.16048400  | -0.22097300 | C | -0.74919700 | 4.15945400  | -0.20682000 |
| H | -0.81849000 | 4.12934300  | -2.38866300 | H | -0.81331100 | 4.13822900  | -2.37437100 |
| C | -0.55482600 | 3.38149100  | 0.91804000  | C | -0.54956900 | 3.37459700  | 0.92824400  |
| H | -0.97536000 | 5.21965900  | -0.12762800 | H | -0.96415100 | 5.21897300  | -0.10843000 |
| H | -0.60900100 | 3.82016700  | 1.90969700  | H | -0.60168300 | 3.80883700  | 1.92199300  |
| H | 4.09242400  | -0.60012700 | 2.45540300  | H | 4.09111200  | -0.61008200 | 2.45027800  |
| C | 3.78217500  | -0.42292900 | 1.43048200  | C | 3.78042500  | -0.42469400 | 1.42693600  |
| C | 4.71315000  | -0.07411500 | 0.44823700  | C | 4.71076200  | -0.06550000 | 0.44790100  |
| C | 4.27386400  | 0.15576900  | -0.85538500 | C | 4.27111800  | 0.17560400  | -0.85358700 |
| H | 5.76415100  | 0.02296600  | 0.70219200  | H | 5.76159500  | 0.03100700  | 0.70276100  |
| C | 2.91854100  | 0.02907400  | -1.14164800 | C | 2.91612400  | 0.04824900  | -1.14093300 |
| H | 4.96480000  | 0.43453000  | -1.64357800 | H | 4.96151500  | 0.46308300  | -1.63909900 |
| H | 2.51435000  | 0.19847700  | -2.13338100 | H | 2.51184100  | 0.22577500  | -2.13119800 |
| H | 1.02925700  | 1.40829200  | 2.33948500  | H | 1.02334900  | 1.39484400  | 2.34582500  |

|                           |             |             |             |                          |             |             |             |
|---------------------------|-------------|-------------|-------------|--------------------------|-------------|-------------|-------------|
| <b>TS<sub>15-16</sub></b> |             |             |             | <b>16</b>                |             |             |             |
| Charge=2 Multiplicity =5  |             |             |             | Charge=2 Multiplicity =1 |             |             |             |
| Fe                        | -0.08130700 | 0.00081000  | 0.43177100  | Fe                       | 0.07835900  | -0.44195400 | -0.53322300 |
| N                         | 0.77761800  | 1.88993500  | 0.31997900  | N                        | 2.02800500  | -0.23196600 | -0.25598000 |
| N                         | -1.69385600 | -0.38570200 | -0.83298500 | N                        | -1.86677600 | -0.78201900 | -0.28400200 |



|   |             |             |             |   |             |             |             |
|---|-------------|-------------|-------------|---|-------------|-------------|-------------|
| N | 1.26260400  | -1.54174100 | 0.72036900  | N | -0.27682600 | 1.46962500  | -0.38033800 |
| C | 1.27672100  | 2.27269300  | -0.88148500 | C | 2.46158200  | -0.51079300 | 1.00026700  |
| C | -1.40217500 | -0.69832500 | -2.12057600 | C | -2.24741800 | -1.02427100 | 0.99644000  |
| C | 2.20177200  | -1.73145300 | -0.24023900 | C | -0.36053500 | 1.96570300  | 0.87189900  |
| C | 1.01312200  | 1.32891400  | -2.03696700 | C | 1.38649000  | -1.02841000 | 1.92817600  |
| H | 1.77526800  | 1.43731600  | -2.81879400 | H | 1.61751600  | -0.82328000 | 2.97934100  |
| C | 0.06415900  | -0.91494200 | -2.43388700 | C | -1.10337800 | -1.21791900 | 1.96637700  |
| H | 0.27349200  | -0.73105600 | -3.49504000 | H | -0.80790500 | -2.27289500 | 1.96876500  |
| H | 0.31476000  | -1.96434800 | -2.23635700 | H | -1.39217800 | -0.96645100 | 2.99233900  |
| C | 2.26000300  | -0.68079000 | -1.33037100 | C | -0.00122800 | 1.01637700  | 1.98967900  |
| H | 2.67498300  | -1.09536900 | -2.25741600 | H | -0.71373800 | 1.09781200  | 2.81657600  |
| N | 0.92159200  | -0.07520500 | -1.55763900 | N | 0.08094600  | -0.41444300 | 1.52131300  |
| O | -0.82853700 | 0.06165400  | 1.94755400  | O | 0.06490800  | -0.34693700 | -2.31033600 |
| H | 0.04961800  | 1.58870700  | -2.49208400 | H | 1.29668200  | -2.11315400 | 1.81488300  |
| H | -4.08879800 | -0.86819800 | 3.28332100  | H | -0.54385500 | -2.93210700 | -0.78019700 |
| O | -3.88055500 | 0.02509100  | 2.95995900  | O | 0.32062700  | -2.50532100 | -0.64301700 |
| C | -2.76801500 | 0.51877200  | 3.60285300  | C | 1.26489900  | -3.11515000 | -1.47988600 |
| H | -2.79763400 | 1.61164400  | 3.60400200  | H | 2.27557800  | -2.78169400 | -1.29429200 |
| H | -2.56911200 | 0.08568700  | 4.58883900  | H | 1.03426100  | -4.12444100 | -1.79862900 |
| H | -1.77914800 | 0.26882700  | 2.91922500  | H | 0.46559200  | -1.11052200 | -2.76564900 |
| C | -2.98432600 | -0.26239400 | -0.45081500 | C | -2.80111200 | -0.66083700 | -1.24958000 |
| C | -2.40489800 | -0.87447700 | -3.06707400 | C | -3.58748000 | -1.15227000 | 1.34181000  |
| C | -4.03278600 | -0.43516200 | -1.34611100 | C | -4.15760500 | -0.79298600 | -0.97202400 |
| H | -3.15970400 | -0.02745500 | 0.59436200  | H | -2.42250000 | -0.45145700 | -2.24413800 |
| C | -3.73935400 | -0.74164200 | -2.67517400 | C | -4.55748500 | -1.03818100 | 0.34187600  |
| H | -2.14799500 | -1.11744500 | -4.09335600 | H | -3.86923700 | -1.34199400 | 2.37274900  |
| H | -5.05609600 | -0.32591200 | -1.00397300 | H | -4.88168600 | -0.69571500 | -1.77366500 |
| H | -4.53646800 | -0.87550000 | -3.40013000 | H | -5.61000400 | -1.13577000 | 0.58950300  |
| H | 0.43594500  | -2.16653300 | 2.50984200  | H | -0.42795700 | 1.80766400  | -2.40934100 |
| C | 1.20333400  | -2.38433000 | 1.77589600  | C | -0.51127700 | 2.27738800  | -1.43653700 |
| C | 2.07617900  | -3.45594600 | 1.90829600  | C | -0.83756800 | 3.61762800  | -1.27087100 |
| C | 3.03541200  | -3.66598600 | 0.91639400  | C | -0.93618800 | 4.13604300  | 0.02089100  |
| H | 2.00109300  | -4.11080600 | 2.76944500  | H | -1.01480100 | 4.23688500  | -2.14341600 |
| C | 3.09711000  | -2.79308500 | -0.17236000 | C | -0.69521000 | 3.29602600  | 1.10773400  |
| H | 3.72810000  | -4.49908000 | 0.98685400  | H | -1.19607600 | 5.17772600  | 0.18162800  |
| H | 3.83592200  | -2.93241400 | -0.95533200 | H | -0.75923900 | 3.66852600  | 2.12552600  |
| H | 2.33069700  | 3.77353000  | -2.00480400 | H | 4.11798300  | -0.58113600 | 2.36920700  |
| C | 1.93230600  | 3.48906100  | -1.03596600 | C | 3.79540800  | -0.35547600 | 1.35767900  |
| C | 2.06286600  | 4.33504400  | 0.06801900  | C | 4.70600700  | 0.09237500  | 0.39642000  |
| C | 1.53938500  | 3.93859300  | 1.29968400  | C | 4.25067900  | 0.38552800  | -0.88912800 |
| H | 2.57030400  | 5.28948000  | -0.03388100 | H | 5.75325000  | 0.21807100  | 0.65340100  |
| C | 0.90456900  | 2.70668000  | 1.38890200  | C | 2.90061000  | 0.21921900  | -1.17932700 |
| H | 1.62372000  | 4.56851300  | 2.17842100  | H | 4.92506600  | 0.74385900  | -1.65928400 |
| H | 0.48215900  | 2.33806200  | 2.31673500  | H | 2.48253900  | 0.43913400  | -2.15516500 |

|   |            |            |             |   |            |            |            |
|---|------------|------------|-------------|---|------------|------------|------------|
| H | 2.93762600 | 0.11898400 | -1.00820700 | H | 0.97650800 | 1.30147000 | 2.39217000 |
|---|------------|------------|-------------|---|------------|------------|------------|

|                          |             |             |             |                          |             |             |             |
|--------------------------|-------------|-------------|-------------|--------------------------|-------------|-------------|-------------|
| <b>16</b>                |             |             |             | <b>16</b>                |             |             |             |
| Charge=2 Multiplicity =3 |             |             |             | Charge=2 Multiplicity =5 |             |             |             |
| Fe                       | 0.07290700  | -0.44583600 | -0.53135700 | Fe                       | -0.08436500 | 0.01423300  | 0.47316900  |
| N                        | 2.02327200  | -0.24957500 | -0.25075000 | N                        | 0.56594900  | 1.97793000  | 0.16465200  |
| N                        | -1.87479000 | -0.76810100 | -0.28155700 | N                        | -1.57448400 | -0.69212400 | -0.82183800 |
| N                        | -0.25904800 | 1.47058000  | -0.38319900 | N                        | 1.44496900  | -1.32731000 | 0.90865300  |
| C                        | 2.45343200  | -0.52556400 | 1.00718200  | C                        | 1.05128100  | 2.29912000  | -1.05929200 |
| C                        | -2.25797000 | -1.01034100 | 0.99826500  | C                        | -1.19238000 | -1.09361100 | -2.05964800 |
| C                        | -0.34074200 | 1.97020400  | 0.86759600  | C                        | 2.43664400  | -1.47922400 | -0.00287400 |
| C                        | 1.37415900  | -1.03342200 | 1.93526500  | C                        | 0.93981500  | 1.22110700  | -2.11769400 |
| H                        | 1.60458700  | -0.82544400 | 2.98601700  | H                        | 1.70494300  | 1.34998300  | -2.89371400 |
| C                        | -1.11579800 | -1.21238900 | 1.96843500  | C                        | 0.30042200  | -1.15114000 | -2.30808300 |
| H                        | -0.82592200 | -2.26892700 | 1.96968000  | H                        | 0.52683500  | -1.04881400 | -3.37695200 |
| H                        | -1.40369000 | -0.96076300 | 2.99465600  | H                        | 0.67013300  | -2.13595100 | -1.99750800 |
| C                        | -0.00622700 | 1.01747700  | 1.99043500  | C                        | 2.40371800  | -0.53066900 | -1.18401600 |
| H                        | -0.73229700 | 1.10439000  | 2.80487200  | H                        | 2.90355600  | -0.96964400 | -2.05666700 |
| N                        | 0.07218300  | -0.41441300 | 1.52425200  | N                        | 1.01020400  | -0.12779900 | -1.50174600 |
| O                        | 0.06736000  | -0.35631400 | -2.30770900 | O                        | -0.88298400 | 0.11748500  | 2.03591200  |
| H                        | 1.27917000  | -2.11824200 | 1.82661400  | H                        | -0.03462300 | 1.31105900  | -2.61302200 |
| H                        | -0.57000200 | -2.93213200 | -0.76216300 | H                        | -4.49030700 | -0.75469800 | 3.18814600  |
| O                        | 0.30005000  | -2.51187900 | -0.64039700 | O                        | -4.25611900 | 0.01603300  | 2.64247200  |
| C                        | 1.21918700  | -3.11509700 | -1.50776600 | C                        | -3.39868700 | 0.82708400  | 3.30395700  |
| H                        | 2.23882100  | -2.80562900 | -1.32990200 | H                        | -3.35262900 | 1.82714400  | 2.88248200  |
| H                        | 0.96255200  | -4.10721200 | -1.85865000 | H                        | -3.27090700 | 0.69018800  | 4.37598900  |
| H                        | 0.43609100  | -1.13941000 | -2.75821600 | C                        | -2.88728800 | -0.69889900 | -0.49659600 |
| C                        | -2.80821700 | -0.63644100 | -1.24676400 | C                        | -2.12342200 | -1.49105800 | -3.01277400 |
| C                        | -3.59905500 | -1.12914200 | 1.34292800  | C                        | -3.86648100 | -1.09300300 | -1.39960900 |
| C                        | -4.16572100 | -0.75898500 | -0.96987200 | H                        | -3.14029700 | -0.38517000 | 0.51029600  |
| H                        | -2.42834900 | -0.42672200 | -2.24071900 | C                        | -3.47966100 | -1.49159100 | -2.67947200 |
| C                        | -4.56792600 | -1.00518000 | 0.34313000  | H                        | -1.79300900 | -1.80063900 | -3.99930100 |
| H                        | -3.88235300 | -1.31907900 | 2.37340600  | H                        | -4.90912300 | -1.08142400 | -1.10162800 |
| H                        | -4.88878700 | -0.65362900 | -1.77140100 | H                        | -4.22127100 | -1.79848600 | -3.41068900 |
| H                        | -5.62121800 | -1.09557000 | 0.59019200  | H                        | 0.63475900  | -1.89146400 | 2.72603000  |
| H                        | -0.39510800 | 1.80782300  | -2.41368000 | C                        | 1.45101100  | -2.07392000 | 2.03601500  |
| C                        | -0.47573800 | 2.28022300  | -1.44196100 | C                        | 2.44530400  | -3.00927900 | 2.29080900  |
| C                        | -0.78166400 | 3.62567400  | -1.28024500 | C                        | 3.46116500  | -3.18086300 | 1.34914300  |
| C                        | -0.87766000 | 4.14794300  | 0.01016200  | H                        | 2.41940500  | -3.58993300 | 3.20634100  |
| H                        | -0.94526300 | 4.24606800  | -2.15464900 | C                        | 3.45501700  | -2.40670500 | 0.18648600  |
| C                        | -0.65499200 | 3.30628400  | 1.09947800  | H                        | 4.24979600  | -3.90842600 | 1.51516700  |
| H                        | -1.12157100 | 5.19393800  | 0.16789400  | H                        | 4.23549100  | -2.51784000 | -0.55972000 |
| H                        | -0.71779000 | 3.68173100  | 2.11627700  | H                        | 1.95539300  | 3.79695900  | -2.30994000 |
| H                        | 4.10777600  | -0.59919200 | 2.37850500  | C                        | 1.56580000  | 3.56364600  | -1.32401000 |

|   |            |             |             |   |             |            |             |
|---|------------|-------------|-------------|---|-------------|------------|-------------|
| C | 3.78766400 | -0.37649400 | 1.36553400  | C | 1.56889300  | 4.52206900 | -0.30789700 |
| C | 4.70212400 | 0.06148100  | 0.40348700  | C | 1.06413500  | 4.18680700 | 0.94959900  |
| C | 4.25038100 | 0.35136700  | -0.88399100 | H | 1.96553100  | 5.51508800 | -0.49608500 |
| H | 5.74973300 | 0.18218400  | 0.66137000  | C | 0.57288500  | 2.90354000 | 1.14975100  |
| C | 2.89969300 | 0.19186900  | -1.17526800 | H | 1.05478200  | 4.90293700 | 1.76395900  |
| H | 4.92790800 | 0.70209400  | -1.65489000 | H | 0.17603400  | 2.57951600 | 2.10539600  |
| H | 2.48366600 | 0.40923200  | -2.15254200 | H | 2.96201100  | 0.37581800 | -0.92076900 |
| H | 0.96627300 | 1.29553700  | 2.41005200  | H | -1.67566800 | 0.34025400 | 2.60191100  |

|                          |             |             |             |                          |             |             |             |
|--------------------------|-------------|-------------|-------------|--------------------------|-------------|-------------|-------------|
| <b>17</b>                |             |             |             | <b>17</b>                |             |             |             |
| Charge=2 Multiplicity =1 |             |             |             | Charge=2 Multiplicity =3 |             |             |             |
| Fe                       | 0.01979800  | -0.47480900 | -0.22609500 | Fe                       | -0.11184300 | 0.48609500  | -0.21153300 |
| N                        | 1.96815600  | -0.22764700 | -0.00848300 | N                        | -2.01839400 | 0.01412600  | -0.01183300 |
| N                        | -1.93234400 | -0.67650000 | -0.05169300 | N                        | 1.79835300  | 0.90631000  | 0.04335100  |
| N                        | -0.19608600 | 1.40525700  | -0.81135300 | N                        | 0.40153500  | -1.38964600 | -0.91584500 |
| C                        | 2.32880100  | 0.01527100  | 1.27946500  | C                        | -2.37314000 | -0.29755500 | 1.26465300  |
| C                        | -2.37700300 | -0.49899000 | 1.22005600  | C                        | 2.25302900  | 0.65382300  | 1.30000700  |
| C                        | -0.31207700 | 2.31124000  | 0.18008700  | C                        | 0.63053400  | -2.27862300 | 0.07095300  |
| C                        | 1.20680500  | -0.13085200 | 2.28545300  | C                        | -1.28118600 | -0.11394700 | 2.30082300  |
| H                        | 1.40877400  | 0.43329700  | 3.20318900  | H                        | -1.46229300 | -0.73858100 | 3.18388200  |
| C                        | -1.28355400 | -0.36748800 | 2.25930100  | C                        | 1.19717800  | 0.28316500  | 2.32483500  |
| H                        | -0.98687000 | -1.36956200 | 2.59069600  | H                        | 0.82459700  | 1.20281800  | 2.79163600  |
| H                        | -1.63145200 | 0.17190000  | 3.14754100  | H                        | 1.62596700  | -0.32661900 | 3.12864600  |
| C                        | -0.21820600 | 1.78184900  | 1.59613700  | C                        | 0.25905900  | -1.86960700 | 1.48837400  |
| H                        | 0.64384000  | 2.23503100  | 2.09687700  | H                        | -0.66963500 | -2.38545000 | 1.75601100  |
| H                        | -1.10196300 | 2.08646900  | 2.16623300  | H                        | 1.02150800  | -2.22221700 | 2.19153000  |
| N                        | -0.08252700 | 0.28408600  | 1.64933300  | N                        | 0.04243600  | -0.39892800 | 1.67270300  |
| O                        | 0.80036000  | -4.56886500 | -1.11554200 | O                        | -1.33442100 | 4.48105100  | -1.20136000 |
| H                        | 1.11293300  | -1.18510000 | 2.57159800  | H                        | -1.27386100 | 0.92821000  | 2.64168300  |
| O                        | 0.13691200  | -2.33339000 | -0.94458900 | O                        | -0.43637800 | 2.36459600  | -0.81507700 |
| C                        | 1.18319700  | -3.29409500 | -1.41512300 | C                        | -1.55168800 | 3.15175100  | -1.42100100 |
| H                        | 1.23125500  | -3.19665100 | -2.50050200 | H                        | -1.52153700 | 2.97398700  | -2.49720200 |
| H                        | 2.10085500  | -2.95195000 | -0.93322400 | H                        | -2.45525300 | 2.74222900  | -0.96523500 |
| H                        | 1.08377800  | -4.82534300 | -0.22230900 | H                        | -1.69813800 | 4.76338100  | -0.34558100 |
| C                        | -3.73146200 | -0.50830600 | 1.53275700  | C                        | 3.59590200  | 0.80125700  | 1.63322100  |
| C                        | -4.66283500 | -0.72143700 | 0.51361800  | C                        | 4.49862600  | 1.23269200  | 0.66015300  |
| H                        | -4.05467300 | -0.35745900 | 2.55797100  | H                        | 3.93052800  | 0.58634100  | 2.64328100  |
| C                        | -2.83837900 | -0.86703800 | -1.03302200 | C                        | 2.68055200  | 1.30909700  | -0.89678100 |
| C                        | -4.20728600 | -0.90567400 | -0.79151300 | C                        | 4.03106400  | 1.49342000  | -0.62824400 |
| H                        | -5.72508100 | -0.73739000 | 0.73648400  | H                        | 5.54916100  | 1.35708500  | 0.90354900  |
| H                        | -2.44488700 | -0.97948800 | -2.03954000 | H                        | 2.28185700  | 1.47300200  | -1.89401800 |
| H                        | -4.89645500 | -1.06792100 | -1.61313000 | H                        | 4.69889900  | 1.82330500  | -1.41657400 |
| C                        | -0.49584600 | 3.66770400  | -0.08262000 | C                        | 1.12634700  | -3.55513200 | -0.19130200 |
| C                        | -0.55805100 | 4.10050600  | -1.40537800 | C                        | 1.37611200  | -3.92984000 | -1.51014700 |

|   |             |             |             |   |             |             |             |
|---|-------------|-------------|-------------|---|-------------|-------------|-------------|
| H | -0.58759400 | 4.37322000  | 0.73775300  | H | 1.30791700  | -4.24672600 | 0.62599600  |
| C | -0.43596500 | 3.16078400  | -2.43139300 | C | 1.12921900  | -3.01145200 | -2.53221600 |
| H | -0.69992500 | 5.15244700  | -1.63241200 | H | 1.75821100  | -4.92046900 | -1.73612400 |
| C | -0.25833100 | 1.82662200  | -2.09313600 | C | 0.65255200  | -1.75250600 | -2.19170300 |
| H | -0.47885600 | 3.45338800  | -3.47479300 | H | 1.30858400  | -3.26014000 | -3.57251400 |
| H | -0.16209700 | 1.06268300  | -2.85966100 | H | 0.46160800  | -1.00419200 | -2.95577200 |
| C | 3.63720900  | 0.32545800  | 1.63238700  | C | -3.65743700 | -0.72351200 | 1.58523200  |
| C | 2.91423200  | -0.15398600 | -0.96672400 | C | -2.94318600 | -0.11055600 | -0.98651600 |
| C | 4.61436000  | 0.38205200  | 0.63584000  | C | -4.61418500 | -0.82928000 | 0.57342200  |
| H | 3.88982200  | 0.51861600  | 2.67026600  | H | -3.90648500 | -0.96982500 | 2.61268200  |
| C | 4.24469200  | 0.13915600  | -0.68674000 | C | -4.24798000 | -0.52046400 | -0.73624800 |
| H | 2.58352500  | -0.33134500 | -1.98579800 | H | -2.61488100 | 0.12080000  | -1.99550200 |
| H | 5.64288400  | 0.61951000  | 0.88896900  | H | -5.62287400 | -1.15730500 | 0.80418400  |
| H | 4.96918800  | 0.18227300  | -1.49274100 | H | -4.95469900 | -0.60142600 | -1.55500600 |
| H | -0.71211100 | -2.79657500 | -1.07529500 | H | 0.34937700  | 2.93872800  | -0.88192600 |

|                          |             |             |             |                           |             |             |             |
|--------------------------|-------------|-------------|-------------|---------------------------|-------------|-------------|-------------|
| <b>17</b>                |             |             |             | <b>TS<sub>17-18</sub></b> |             |             |             |
| Charge=2 Multiplicity =5 |             |             |             | Charge=2 Multiplicity =1  |             |             |             |
| Fe                       | -0.01132500 | -0.04523100 | 0.49239900  | Fe                        | -0.05700300 | 0.51255700  | -0.13559300 |
| N                        | 1.90927100  | -0.90115200 | 0.55134100  | N                         | -2.01542300 | 0.27884300  | 0.01578400  |
| N                        | 0.04722100  | 2.00578600  | -0.00803700 | N                         | 1.89001000  | 0.65128300  | 0.11413900  |
| N                        | -1.72513300 | -1.07251600 | -0.21774900 | N                         | 0.17930700  | -1.30545500 | -0.90874700 |
| C                        | 2.54737000  | -0.96857600 | -0.64315700 | C                         | -2.41345900 | -0.04932400 | 1.27325500  |
| C                        | 0.04093100  | 2.26615800  | -1.33990400 | C                         | 2.30660800  | 0.28432900  | 1.35229900  |
| C                        | -1.59303000 | -1.55496100 | -1.47920800 | C                         | 0.26282200  | -2.31238100 | -0.01604100 |
| C                        | 1.90918800  | -0.21752500 | -1.79730600 | C                         | -1.30461600 | -0.03971000 | 2.30457500  |
| H                        | 2.20566600  | -0.65672600 | -2.75867600 | H                         | -1.54892200 | -0.67011000 | 3.16779300  |
| C                        | -0.13637500 | 1.07535000  | -2.26489800 | C                         | 1.19381800  | 0.04336100  | 2.35051000  |
| H                        | 0.29661900  | 1.28467200  | -3.25163100 | H                         | 0.93605400  | 0.99792800  | 2.82406800  |
| H                        | -1.20834400 | 0.90404300  | -2.42030900 | H                         | 1.50860700  | -0.63463700 | 3.15179900  |
| C                        | -0.23063400 | -1.39022900 | -2.12448400 | C                         | 0.00834000  | -1.94614500 | 1.43016800  |
| H                        | -0.31529300 | -1.42276300 | -3.21877100 | H                         | -0.95632300 | -2.36564400 | 1.73543700  |
| N                        | 0.43450600  | -0.15079400 | -1.66200300 | H                         | 0.76332000  | -2.40048200 | 2.08023500  |
| H                        | 2.29003100  | 0.81081200  | -1.78911500 | N                         | -0.02766200 | -0.45948700 | 1.64901300  |
| C                        | 0.16949500  | 3.04229500  | 0.84974000  | O                         | -0.07636800 | 4.34033700  | -1.48048800 |
| C                        | 0.14959500  | 3.56427200  | -1.83289000 | H                         | -1.16639800 | 0.98102900  | 2.68002300  |
| C                        | 0.27353000  | 4.36215900  | 0.43213500  | H                         | 0.59305300  | 3.46564000  | -1.05854100 |
| H                        | 0.19752300  | 2.79307400  | 1.90647800  | O                         | -0.12769500 | 2.36176700  | -0.74185300 |
| C                        | 0.26029000  | 4.62848600  | -0.93790700 | C                         | -1.09247700 | 3.28940300  | -1.11463900 |
| H                        | 0.14802500  | 3.73904500  | -2.90426600 | H                         | -1.64591000 | 3.05808100  | -2.02568300 |
| H                        | 0.37098600  | 5.15809700  | 1.16239100  | H                         | -1.73169300 | 3.65873000  | -0.30737800 |
| H                        | 0.34509900  | 5.64689900  | -1.30446000 | H                         | -0.11763200 | 5.15143600  | -0.93082000 |
| H                        | -2.97706300 | -0.80908900 | 1.41844400  | C                         | 3.65513000  | 0.21732700  | 1.68516300  |
| C                        | -2.90821800 | -1.22681500 | 0.41840000  | C                         | 4.60886700  | 0.55103800  | 0.72124500  |

|   |             |             |             |   |             |             |             |
|---|-------------|-------------|-------------|---|-------------|-------------|-------------|
| C | -3.99086800 | -1.87415300 | -0.16509400 | H | 3.95555300  | -0.08555600 | 2.68332100  |
| C | -3.85447900 | -2.37352500 | -1.46014200 | C | 2.81512500  | 0.96487400  | -0.81357500 |
| H | -4.91943300 | -1.97661300 | 0.38593900  | C | 4.18011700  | 0.93466500  | -0.54922700 |
| C | -2.64000800 | -2.20298100 | -2.12719700 | H | 5.66708900  | 0.50786200  | 0.95908400  |
| H | -4.68113300 | -2.88039700 | -1.94846800 | H | 2.43782600  | 1.23987400  | -1.79375000 |
| H | -2.50598800 | -2.57174300 | -3.13931000 | H | 4.88758400  | 1.19775200  | -1.32810600 |
| H | 4.25116400  | -1.67091300 | -1.75227200 | C | 0.52115200  | -3.62434700 | -0.40860800 |
| C | 3.76759100  | -1.62371400 | -0.78154000 | C | 0.68841000  | -3.90662300 | -1.76288200 |
| C | 4.35992000  | -2.20712900 | 0.33957300  | H | 0.58666400  | -4.41230800 | 0.33564300  |
| C | 3.71131900  | -2.12059600 | 1.57196800  | C | 0.59537100  | -2.86415300 | -2.68719600 |
| H | 5.31243600  | -2.72046700 | 0.25070900  | H | 0.88884400  | -4.92161600 | -2.09127900 |
| C | 2.48896200  | -1.46424000 | 1.63377100  | C | 0.34582900  | -1.58093800 | -2.21970100 |
| H | 4.13914200  | -2.55602800 | 2.46836100  | H | 0.71845200  | -3.03836400 | -3.75051600 |
| H | 1.94446000  | -1.37278500 | 2.56765000  | H | 0.27496000  | -0.73961700 | -2.90322200 |
| H | 0.40664400  | -2.23368200 | -1.83073300 | C | -3.74007600 | -0.33401200 | 1.57633800  |
| O | -0.48607700 | -0.42240500 | 2.56143400  | C | -2.94217500 | 0.31629300  | -0.96205100 |
| C | -1.14576800 | 0.35019300  | 3.62817100  | C | -4.69698600 | -0.27358700 | 0.56056300  |
| H | -0.74129900 | -1.35324700 | 2.68713500  | H | -4.02170700 | -0.59906600 | 2.59061100  |
| O | -2.48145500 | 0.55226100  | 3.34720900  | C | -4.28891000 | 0.05473200  | -0.73169900 |
| H | -0.56401900 | 1.27062700  | 3.70849600  | H | -2.58065300 | 0.55123400  | -1.95880200 |
| H | -1.06150700 | -0.24116200 | 4.54117600  | H | -5.73892000 | -0.48986300 | 0.77472400  |
| H | -2.63294000 | 1.43944300  | 2.98467200  | H | -4.99621000 | 0.09929300  | -1.55279600 |

| <b>TS<sub>17-18</sub></b> |             |             |             | <b>TS<sub>17-18</sub></b> |             |             |             |
|---------------------------|-------------|-------------|-------------|---------------------------|-------------|-------------|-------------|
| Charge=2 Multiplicity =3  |             |             |             | Charge=2 Multiplicity =5  |             |             |             |
| Fe                        | -0.13085300 | 0.53228900  | -0.11026000 | Fe                        | -0.07287800 | -0.01517200 | 0.49189400  |
| N                         | -2.06199900 | 0.13608200  | 0.02259900  | N                         | -1.93941400 | -0.49556900 | -0.41616100 |
| N                         | 1.78868300  | 0.82639800  | 0.21222400  | N                         | 1.48442900  | -1.45161100 | 0.41218200  |
| N                         | 0.31890200  | -1.30837300 | -1.02408000 | N                         | 0.64564500  | 1.95330400  | 0.22252200  |
| C                         | -2.45278500 | -0.27018200 | 1.26103600  | C                         | -1.88434500 | -0.81078000 | -1.73235800 |
| C                         | 2.22286000  | 0.37975800  | 1.41918400  | C                         | 2.16052800  | -1.54330400 | -0.75817800 |
| C                         | 0.49956500  | -2.29555000 | -0.12430800 | C                         | 0.78321900  | 2.35867100  | -1.06257600 |
| C                         | -1.35787700 | -0.25948400 | 2.30877400  | C                         | -0.49927000 | -0.93257300 | -2.33548100 |
| H                         | -1.58213700 | -0.95334400 | 3.12823600  | H                         | -0.53638300 | -0.78070300 | -3.42272100 |
| C                         | 1.14244000  | -0.07008400 | 2.38417500  | C                         | 1.85321400  | -0.48307500 | -1.79833500 |
| H                         | 0.83004100  | 0.79281400  | 2.98421100  | H                         | 2.07775100  | -0.85184100 | -2.80796800 |
| H                         | 1.52663200  | -0.81882600 | 3.08664500  | H                         | 2.51258800  | 0.37556100  | -1.62272900 |
| C                         | 0.03872300  | -2.02579700 | 1.29812900  | C                         | 0.29304100  | 1.39357200  | -2.12657600 |
| H                         | -0.95962600 | -2.46179800 | 1.41383000  | H                         | 0.79765700  | 1.58291900  | -3.08341700 |
| H                         | 0.68803200  | -2.54078500 | 2.01441100  | N                         | 0.45575000  | -0.00934700 | -1.68509600 |
| N                         | -0.05516700 | -0.57157400 | 1.64799600  | H                         | -0.13477200 | -1.95410400 | -2.17099100 |
| O                         | -0.45302100 | 4.37023000  | -1.40416000 | C                         | 1.78479400  | -2.31785900 | 1.40182600  |
| H                         | -1.27940200 | 0.74269900  | 2.74692800  | C                         | 3.13414500  | -2.51699800 | -0.96684900 |

|   |             |             |             |   |             |             |             |
|---|-------------|-------------|-------------|---|-------------|-------------|-------------|
| H | 0.26942500  | 3.56574400  | -0.93628900 | C | 2.74959200  | -3.30798600 | 1.27137300  |
| O | -0.33167700 | 2.36421500  | -0.76132000 | H | 1.22724400  | -2.20229700 | 2.32604300  |
| C | -1.35796100 | 3.18009600  | -1.21614600 | C | 3.43545200  | -3.41128600 | 0.06049400  |
| H | -1.75907600 | 2.93562500  | -2.20137900 | H | 3.65225200  | -2.57102300 | -1.91926700 |
| H | -2.13679500 | 3.42044300  | -0.48582800 | H | 2.95444300  | -3.98131700 | 2.09646800  |
| H | -0.66865900 | 5.13520300  | -0.82980700 | H | 4.19219100  | -4.17639500 | -0.08309600 |
| C | 3.56937000  | 0.41052200  | 1.76958800  | H | 0.90055000  | 2.40963900  | 2.22385000  |
| C | 4.49742900  | 0.92412700  | 0.86302500  | C | 1.02168400  | 2.78772500  | 1.21360300  |
| H | 3.88656500  | 0.04145700  | 2.73992000  | C | 1.53808200  | 4.05451100  | 0.97151700  |
| C | 2.69194400  | 1.31479600  | -0.66245700 | C | 1.68102100  | 4.47286000  | -0.35207200 |
| C | 4.04906100  | 1.38748800  | -0.37444300 | H | 1.82727100  | 4.69224400  | 1.79968600  |
| H | 5.55209400  | 0.95750600  | 1.11780400  | C | 1.30313100  | 3.61017500  | -1.38199200 |
| H | 2.29960800  | 1.64681000  | -1.61837300 | H | 2.08732700  | 5.45330100  | -0.58097700 |
| H | 4.73737600  | 1.78921400  | -1.11009100 | H | 1.40920500  | 3.90637200  | -2.42093200 |
| C | 1.00556700  | -3.54210500 | -0.48857000 | H | -2.96002300 | -1.30022200 | -3.52944000 |
| C | 1.31718300  | -3.78291000 | -1.82608700 | C | -3.03633300 | -1.05871300 | -2.47388100 |
| H | 1.14666000  | -4.31412900 | 0.26188800  | C | -4.28009000 | -0.99616600 | -1.84427400 |
| C | 1.12044700  | -2.76444900 | -2.75953100 | C | -4.33643500 | -0.67269500 | -0.48843700 |
| H | 1.70847400  | -4.74785200 | -2.13302400 | H | -5.18901700 | -1.18956600 | -2.40556100 |
| C | 0.63071000  | -1.54230200 | -2.31480800 | C | -3.14597900 | -0.42468400 | 0.18326400  |
| H | 1.34866800  | -2.90789700 | -3.81006100 | H | -5.28200800 | -0.60525100 | 0.03838300  |
| H | 0.47901100  | -0.71858800 | -3.00682300 | H | -3.14026200 | -0.15193700 | 1.23316400  |
| C | -3.76436000 | -0.64276500 | 1.53306400  | H | -0.77680800 | 1.56799400  | -2.29387800 |
| C | -2.98062800 | 0.16031100  | -0.96435700 | H | -1.70599800 | -1.55938500 | 3.15222400  |
| C | -4.71365500 | -0.59270500 | 0.50979300  | C | -1.14288400 | -0.67032100 | 3.44659800  |
| H | -4.04000300 | -0.96870500 | 2.53110400  | O | -2.14658600 | 0.32565300  | 3.99286600  |
| C | -4.31175300 | -0.18808800 | -0.76255300 | O | -0.73476000 | 0.16201900  | 2.42183800  |
| H | -2.62303600 | 0.45547500  | -1.94620400 | H | -0.39225200 | -0.87730300 | 4.21687100  |
| H | -5.74344100 | -0.87698600 | 0.70193800  | H | -1.97374300 | 0.61967800  | 4.91304300  |
| H | -5.01126300 | -0.15093800 | -1.59066300 | H | -1.60189200 | 0.92285400  | 3.13426100  |

|                          |             |             |             |                          |             |             |             |
|--------------------------|-------------|-------------|-------------|--------------------------|-------------|-------------|-------------|
| <b>18</b>                |             |             |             | <b>18</b>                |             |             |             |
| Charge=2 Multiplicity =1 |             |             |             | Charge=2 Multiplicity =3 |             |             |             |
| Fe                       | 0.07427500  | -0.49992000 | 0.47269700  | Fe                       | 0.00101600  | -0.61256100 | 0.40964100  |
| N                        | -0.16797500 | 1.43165000  | 0.24492700  | N                        | -0.00173500 | 1.51579200  | 0.47439900  |
| N                        | -1.89212300 | -0.73232100 | 0.28130200  | N                        | -1.96485800 | -0.62901900 | 0.17382900  |
| N                        | 2.04865000  | -0.38953800 | 0.24289600  | N                        | 1.96689000  | -0.62518200 | 0.17401600  |
| C                        | -0.22777700 | 1.84962500  | -1.03821500 | C                        | -0.00278500 | 2.08567900  | -0.74122100 |
| C                        | -2.27052600 | -1.04866000 | -0.98418100 | C                        | -2.36120400 | -0.71819900 | -1.12526500 |
| C                        | 2.46105900  | -0.76758900 | -0.99694900 | C                        | 2.36354900  | -0.71438700 | -1.12497500 |
| C                        | 0.06785700  | 0.80980700  | -2.09176600 | C                        | 0.00014100  | 1.17267000  | -1.95931700 |
| H                        | 1.05158600  | 1.01925900  | -2.52513900 | H                        | 0.87662200  | 1.40484300  | -2.57348600 |
| C                        | -1.13086000 | -1.36453500 | -1.92592700 | C                        | -1.24977900 | -0.96351700 | -2.12364000 |

|   |             |             |             |   |             |             |             |
|---|-------------|-------------|-------------|---|-------------|-------------|-------------|
| H | -0.88443000 | -2.42769500 | -1.84287000 | H | -1.05111800 | -2.03847900 | -2.18237700 |
| C | 1.35873800  | -1.27900200 | -1.89855300 | C | 1.25258300  | -0.96192600 | -2.12332700 |
| H | 1.21480900  | -2.35142300 | -1.73924800 | H | 1.05551600  | -2.03720400 | -2.18155600 |
| N | 0.08450100  | -0.58725700 | -1.52855600 | N | 0.00090600  | -0.29787600 | -1.65488700 |
| O | 0.23745000  | -2.56904900 | 0.62706000  | O | 0.00307500  | -2.90702900 | 0.22049100  |
| H | -0.65201700 | 0.87389000  | -2.91414300 | H | -0.87428400 | 1.40343100  | -2.57693800 |
| O | 0.00206400  | -0.37734800 | 2.41778600  | O | 0.00159600  | -0.89672400 | 2.39560600  |
| C | 0.47734300  | -0.96843400 | 3.38754800  | C | 0.00249600  | -1.74927100 | 3.28061900  |
| H | 1.18344300  | -1.80258400 | 3.26973900  | H | 0.00321600  | -2.82106400 | 3.04001900  |
| H | 0.19990500  | -0.66403400 | 4.40337000  | H | 0.00261400  | -1.44847100 | 4.33604600  |
| H | 1.60452000  | -1.13782600 | -2.95726400 | H | 1.53878000  | -0.63172900 | -3.12872100 |
| H | 1.05554000  | -3.04284200 | 0.85112700  | H | 0.77974900  | -3.49111300 | 0.20879100  |
| H | -0.50334000 | -3.10346900 | 0.95867800  | H | -0.77298500 | -3.49192000 | 0.20855400  |
| H | -3.87367000 | -1.38424300 | -2.37790700 | H | -3.98022000 | -0.70592200 | -2.53866900 |
| C | -3.60799100 | -1.13427600 | -1.35553800 | C | -3.70016100 | -0.63846600 | -1.49207800 |
| C | -4.59505700 | -0.89756600 | -0.39688900 | C | -4.67055800 | -0.47188500 | -0.50235200 |
| C | -4.20817500 | -0.56976400 | 0.90212300  | C | -4.26488300 | -0.37520000 | 0.82788600  |
| H | -5.64543400 | -0.96166100 | -0.66322600 | H | -5.72116900 | -0.40994900 | -0.76818400 |
| C | -2.85168900 | -0.48799900 | 1.19737400  | C | -2.90798500 | -0.44923300 | 1.12171000  |
| H | -4.94141000 | -0.37013600 | 1.67601200  | H | -4.98261800 | -0.23428700 | 1.62871500  |
| H | -2.50642200 | -0.21311400 | 2.18792500  | H | -2.55127900 | -0.35331800 | 2.14116600  |
| C | 2.96998300  | 0.08393900  | 1.10602800  | C | 2.90955500  | -0.44325900 | 1.12194200  |
| C | 4.32249900  | 0.16818200  | 0.79338800  | C | 4.26636900  | -0.36710400 | 0.82826400  |
| H | 2.60100300  | 0.41515900  | 2.07077000  | H | 2.55249100  | -0.34739000 | 2.14127800  |
| C | 3.79510900  | -0.70088800 | -1.38392500 | C | 3.70242000  | -0.63263100 | -1.49164300 |
| C | 4.74538200  | -0.23562500 | -0.47243400 | C | 4.67239400  | -0.46388300 | -0.50186100 |
| H | 5.02299200  | 0.55340200  | 1.52643400  | H | 4.98375600  | -0.22453400 | 1.62911200  |
| H | 4.08625100  | -1.00507700 | -2.38448500 | H | 3.98275000  | -0.70019700 | -2.53815500 |
| H | 5.79251800  | -0.17704400 | -0.75235800 | H | 5.72294000  | -0.40036700 | -0.76757600 |
| H | -0.53709300 | 3.47214900  | -2.41765400 | H | -0.00674300 | 3.90311600  | -1.90379800 |
| C | -0.49203300 | 3.17529600  | -1.37419100 | C | -0.00591600 | 3.47154300  | -0.90704200 |
| C | -0.69110600 | 4.10705500  | -0.35779000 | C | -0.00789100 | 4.28731200  | 0.22180800  |
| C | -0.62430500 | 3.67761900  | 0.96812200  | C | -0.00673000 | 3.69333200  | 1.48590100  |
| H | -0.89618900 | 5.14597100  | -0.59602200 | H | -0.01029500 | 5.36786800  | 0.11754000  |
| C | -0.36899200 | 2.33745100  | 1.22680400  | C | -0.00370600 | 2.30717400  | 1.56635600  |
| H | -0.77427500 | 4.36558100  | 1.79304400  | H | -0.00817200 | 4.29092000  | 2.39103100  |
| H | -0.32897000 | 1.95795700  | 2.24044900  | H | -0.00277400 | 1.79715500  | 2.52457400  |
| H | -1.40472100 | -1.17867600 | -2.97027200 | H | -1.53642500 | -0.63328700 | -3.12889900 |

**18**

Charge=2 Multiplicity =5

|    |             |            |             |
|----|-------------|------------|-------------|
| Fe | 0.09817600  | 0.02094900 | -0.43734200 |
| N  | -0.11607300 | 2.11340800 | -0.23105100 |

**19**

Charge=2 Multiplicity =5

|    |             |             |            |
|----|-------------|-------------|------------|
| Fe | -0.16131000 | -0.01116500 | 0.46524100 |
| N  | -2.12575700 | -0.07008700 | 0.92962000 |

|   |             |             |             |   |             |             |             |
|---|-------------|-------------|-------------|---|-------------|-------------|-------------|
| N | 1.32948100  | -0.92929900 | 0.98246600  | N | 0.78126800  | -1.66068300 | -0.22037600 |
| N | -1.54257000 | -1.18416200 | -1.01161800 | N | 0.70752200  | 1.69966400  | -0.17556500 |
| C | -0.69971000 | 2.52472100  | 0.92070100  | C | -2.96553000 | -0.29962000 | -0.11411800 |
| C | 0.74242800  | -1.20978600 | 2.17229300  | C | -4.34328800 | -0.29361000 | 0.05657800  |
| C | -2.63650900 | -1.06531100 | -0.22031100 | H | -4.99951600 | -0.47306500 | -0.78913300 |
| C | -0.92844700 | 1.46170700  | 1.97795600  | C | -4.86502200 | -0.06244100 | 1.33333200  |
| H | -1.74031700 | 1.75708500  | 2.65583300  | H | -5.93965800 | -0.05591300 | 1.48820100  |
| C | -0.75476000 | -0.97500600 | 2.26156000  | C | -3.99488200 | 0.15916700  | 2.40194800  |
| H | -1.05973200 | -0.80143800 | 3.30178700  | H | -4.36594800 | 0.33858300  | 3.40506400  |
| H | -1.27102200 | -1.88364700 | 1.92925000  | C | -2.62616300 | 0.15140700  | 2.16508100  |
| C | -2.56261700 | -0.01997800 | 0.87767600  | H | -1.89606500 | 0.31850500  | 2.94920800  |
| H | -3.26274900 | -0.26251900 | 1.68825500  | C | 0.66009600  | -1.87715200 | -1.55707300 |
| N | -1.17686900 | 0.13359800  | 1.37415700  | C | 1.18154500  | -3.01937000 | -2.14913000 |
| O | 1.09074500  | 0.00991800  | -2.28720700 | H | 1.06944500  | -3.18251900 | -3.21634700 |
| H | -0.02037900 | 1.38178900  | 2.58798500  | C | 1.86176000  | -3.94384500 | -1.34972500 |
| O | 3.74520100  | -0.38127600 | -2.38707700 | H | 2.27715100  | -4.84344300 | -1.79362300 |
| C | 4.67137700  | -0.35573100 | -3.18092800 | C | 2.00668300  | -3.69724000 | 0.01588200  |
| H | 4.52591200  | -0.08773800 | -4.24027500 | H | 2.53883100  | -4.38792000 | 0.66067300  |
| H | 5.69512200  | -0.60254700 | -2.86068600 | C | 1.45140300  | -2.54205900 | 0.55223600  |
| C | 2.64584200  | -1.19099200 | 0.82820200  | H | 1.53816800  | -2.28274000 | 1.60032400  |
| C | 1.46280400  | -1.74584100 | 3.23572300  | C | 0.17247500  | 2.21304500  | -1.31586000 |
| C | 3.42337800  | -1.73405800 | 1.84394500  | C | 0.67739300  | 3.37094400  | -1.88937900 |
| H | 3.07905100  | -0.95260200 | -0.13842800 | H | 0.24227500  | 3.76456200  | -2.80255200 |
| C | 2.82192500  | -2.01539500 | 3.07040900  | C | 1.75066700  | 4.01823900  | -1.26750600 |
| H | 0.96661900  | -1.95274600 | 4.17879200  | H | 2.15707700  | 4.92915400  | -1.69645000 |
| H | 4.47711300  | -1.92690100 | 1.67506700  | C | 2.30085700  | 3.47509400  | -0.10704600 |
| H | 3.40038300  | -2.43464300 | 3.88793000  | H | 3.14465500  | 3.94293200  | 0.38819000  |
| H | -0.65619800 | -2.15349400 | -2.61348300 | C | 1.76098200  | 2.30495000  | 0.41673500  |
| C | -1.56367900 | -2.07865800 | -2.02212500 | H | 2.18182500  | 1.79904600  | 1.28236500  |
| C | -2.66908300 | -2.87295100 | -2.29873500 | C | -2.28148500 | -0.63162000 | -1.42018400 |
| C | -3.79800900 | -2.74670400 | -1.48826200 | H | -2.88477700 | -0.33688400 | -2.28647900 |
| H | -2.64065700 | -3.57691100 | -3.12324100 | C | 0.01922200  | -0.75092300 | -2.33856900 |
| C | -3.77685100 | -1.83581700 | -0.43109900 | H | -0.48726300 | -1.11320100 | -3.24016500 |
| H | -4.67911400 | -3.35464400 | -1.66932100 | H | 0.80223000  | -0.05612300 | -2.66326500 |
| H | -4.63636100 | -1.72438000 | 0.22249800  | C | -1.01950200 | 1.45845100  | -1.86191600 |
| H | -1.48116500 | 4.16319500  | 2.07393500  | H | -1.94189100 | 1.86135100  | -1.42736300 |
| C | -1.00507400 | 3.86398000  | 1.14541700  | H | -1.10146700 | 1.55952000  | -2.95023100 |
| C | -0.68597700 | 4.80956200  | 0.16969200  | N | -0.93133300 | 0.01393700  | -1.46877500 |
| C | -0.07302300 | 4.38630700  | -1.00986700 | O | 0.36804500  | -0.03054100 | 1.98612200  |
| H | -0.91468900 | 5.85888500  | 0.32863700  | H | 2.76083700  | 0.00097300  | 2.96761500  |
| C | 0.18974400  | 3.03184000  | -1.17170900 | O | 3.23407000  | 0.04418100  | 2.12209800  |
| H | 0.19239800  | 5.08817100  | -1.79283700 | C | 4.64351900  | 0.00696200  | 2.40082500  |
| H | 0.66117000  | 2.65130900  | -2.07165400 | H | 4.95759500  | 0.85037000  | 3.02752300  |
| H | -2.87671400 | 0.94797900  | 0.46791600  | H | 5.15544900  | 0.07226000  | 1.43861800  |



|   |            |             |             |   |             |             |             |
|---|------------|-------------|-------------|---|-------------|-------------|-------------|
| H | 2.06713200 | -0.10023900 | -2.45202600 | H | 4.93342900  | -0.93027100 | 2.89089300  |
| H | 0.65371100 | 0.06610200  | -3.15165500 | H | -2.13151900 | -1.71608800 | -1.48209800 |

| <b>TS<sub>19-20</sub></b> |             |             |             | <b>20</b>                |             |             |             |
|---------------------------|-------------|-------------|-------------|--------------------------|-------------|-------------|-------------|
| Charge=2 Multiplicity =5  |             |             |             | Charge=2 Multiplicity =5 |             |             |             |
| N                         | -0.61392300 | 1.81860300  | -0.23035200 | Fe                       | -0.01439000 | -0.01469000 | 0.34360300  |
| N                         | -1.07763000 | -1.56823200 | -0.31188200 | N                        | 1.70758000  | -0.79135300 | 1.05876800  |
| N                         | 1.98939600  | -0.23603600 | 0.82736500  | N                        | 0.01647300  | 1.98187300  | -0.15834900 |
| C                         | -0.50800900 | 2.03309100  | -1.56772300 | N                        | -1.33421100 | -1.19827700 | -0.65297100 |
| C                         | -0.83609800 | 3.25844800  | -2.13220700 | C                        | 2.74525600  | -0.80471800 | 0.18497700  |
| H                         | -0.73774200 | 3.41235500  | -3.20214200 | C                        | 3.96998900  | -1.36481300 | 0.52330500  |
| C                         | -1.30046800 | 4.28201100  | -1.30020400 | H                        | 4.78711700  | -1.37159900 | -0.19104200 |
| H                         | -1.56519300 | 5.24713700  | -1.72119300 | C                        | 4.12943800  | -1.90828300 | 1.80197900  |
| C                         | -1.41598800 | 4.05210200  | 0.07099000  | H                        | 5.07855400  | -2.34994100 | 2.08994000  |
| H                         | -1.77278100 | 4.82317900  | 0.74490600  | C                        | 3.06265400  | -1.87563600 | 2.70101700  |
| C                         | -1.05741000 | 2.80758900  | 0.57480500  | H                        | 3.15628000  | -2.28244600 | 3.70190900  |
| H                         | -1.12012700 | 2.57208300  | 1.63059200  | C                        | 1.85943000  | -1.31007800 | 2.29461800  |
| C                         | -0.61842400 | -2.10557800 | -1.47308800 | H                        | 0.99151800  | -1.24154300 | 2.94112100  |
| C                         | -1.27097100 | -3.16216400 | -2.09277000 | C                        | 0.39571200  | 2.23185800  | -1.43548800 |
| H                         | -0.88962000 | -3.57151000 | -3.02290200 | C                        | 0.54966600  | 3.52910300  | -1.90697600 |
| C                         | -2.42025700 | -3.68834600 | -1.49466300 | H                        | 0.86038200  | 3.70759800  | -2.93152300 |
| H                         | -2.94534900 | -4.51690500 | -1.95998800 | C                        | 0.29327300  | 4.59474100  | -1.03847700 |
| C                         | -2.88786300 | -3.13106300 | -0.30502400 | H                        | 0.40473200  | 5.61763400  | -1.38485700 |
| H                         | -3.78208500 | -3.50660700 | 0.18021300  | C                        | -0.09667400 | 4.33046200  | 0.27462500  |
| C                         | -2.19439100 | -2.06716500 | 0.26175000  | H                        | -0.29624300 | 5.13312800  | 0.97608500  |
| H                         | -2.53067800 | -1.57257800 | 1.16753100  | C                        | -0.21998800 | 3.00709500  | 0.68420000  |
| C                         | 2.84729800  | -0.07870100 | -0.21413800 | H                        | -0.50278800 | 2.72986700  | 1.69374500  |
| C                         | 4.21383400  | -0.26784500 | -0.05920500 | C                        | -0.83666600 | -1.74461000 | -1.79459100 |
| H                         | 4.88396900  | -0.14341400 | -0.90386400 | C                        | -1.61057800 | -2.55094300 | -2.61860400 |
| C                         | 4.70669700  | -0.61144100 | 1.20376400  | H                        | -1.18798300 | -2.96788400 | -3.52723600 |
| H                         | 5.77210100  | -0.76268100 | 1.34830500  | C                        | -2.93229900 | -2.81882100 | -2.25332200 |
| C                         | 3.82020700  | -0.75790600 | 2.27164800  | H                        | -3.55552700 | -3.44815900 | -2.88118700 |
| H                         | 4.17060100  | -1.02051000 | 3.26379700  | C                        | -3.43759100 | -2.26483300 | -1.07784200 |
| C                         | 2.46211100  | -0.56501800 | 2.04831400  | H                        | -4.45859700 | -2.44736500 | -0.76120000 |
| H                         | 1.71744400  | -0.66152200 | 2.83086000  | C                        | -2.61334700 | -1.45819600 | -0.30152100 |
| C                         | -0.08257200 | 0.82733200  | -2.37379400 | H                        | -2.97747900 | -1.00058300 | 0.61078700  |
| H                         | 0.44218600  | 1.11138600  | -3.29289100 | C                        | 2.47005600  | -0.10074000 | -1.12351600 |
| C                         | 0.66893300  | -1.50329700 | -1.98597600 | H                        | 3.05296700  | -0.52031300 | -1.95139100 |
| H                         | 0.74724400  | -1.56978900 | -3.07718000 | C                        | 0.57300700  | 0.99627400  | -2.28635500 |
| H                         | 1.52390500  | -2.04401700 | -1.56347500 | H                        | 1.28880600  | 1.15477000  | -3.10103200 |
| C                         | 2.19912600  | 0.38444100  | -1.49816400 | H                        | -0.38674900 | 0.72653100  | -2.74166600 |
| H                         | 2.19248000  | 1.48034900  | -1.52564700 | C                        | 0.62471000  | -1.46460000 | -2.04882400 |
| H                         | 2.74239300  | 0.03877900  | -2.38495500 | H                        | 1.23346100  | -2.24294900 | -1.57377000 |

|    |             |             |             |   |             |             |             |
|----|-------------|-------------|-------------|---|-------------|-------------|-------------|
| N  | 0.77302800  | -0.07582200 | -1.53733300 | H | 0.86489400  | -1.46996900 | -3.11831400 |
| H  | -0.97228600 | 0.25938500  | -2.66851800 | N | 1.00362500  | -0.15542600 | -1.42813000 |
| Fe | 0.04332100  | -0.01210400 | 0.37368200  | O | -0.72396500 | 0.18981300  | 1.92906600  |
| O  | -0.42486400 | 0.04605100  | 2.01289200  | O | -3.51265400 | 0.19123200  | 2.38280300  |
| H  | -1.51804200 | 0.25668200  | 2.25831100  | C | -4.20255100 | 0.58764500  | 3.50213100  |
| O  | -2.72865600 | 0.24447400  | 2.47109100  | H | -4.32543600 | -0.33410400 | 4.11410200  |
| C  | -3.03408400 | 0.05557500  | 3.82235500  | H | -5.22873000 | 0.89734300  | 3.24952800  |
| H  | -2.92708300 | -0.99639600 | 4.12746700  | H | -3.67487400 | 1.33245800  | 4.11092200  |
| H  | -2.46758400 | 0.71760100  | 4.48787900  | H | 2.74845200  | 0.95530900  | -1.03074900 |
| H  | -4.10808800 | 0.29549900  | 3.92068700  | H | -1.70092100 | 0.23262500  | 2.05396400  |

|                           |             |             |             |
|---------------------------|-------------|-------------|-------------|
| <b>TS<sub>20-18</sub></b> |             |             |             |
| Charge=2 Multiplicity =5  |             |             |             |
| Fe                        | 0.04118900  | 0.01339500  | 0.44160500  |
| N                         | 2.02570200  | -0.22797400 | 0.85003700  |
| N                         | -0.71580200 | 1.88184900  | -0.04062000 |
| N                         | -0.91063300 | -1.61185500 | -0.41496700 |
| C                         | 2.84756100  | 0.15535400  | -0.16275200 |
| C                         | 4.22822400  | 0.02299500  | -0.06805800 |
| H                         | 4.86299400  | 0.33225600  | -0.89240500 |
| C                         | 4.78070500  | -0.51282000 | 1.09753800  |
| H                         | 5.85683600  | -0.62172400 | 1.19171700  |
| C                         | 3.93376700  | -0.92021000 | 2.12976300  |
| H                         | 4.32387600  | -1.35571800 | 3.04322000  |
| C                         | 2.56346700  | -0.76779000 | 1.96684700  |
| H                         | 1.86655200  | -1.09495500 | 2.73100900  |
| C                         | -0.63614100 | 2.19819300  | -1.35748000 |
| C                         | -1.06141700 | 3.43131000  | -1.83669800 |
| H                         | -0.98076300 | 3.66356400  | -2.89394800 |
| C                         | -1.60135300 | 4.35607100  | -0.93907500 |
| H                         | -1.94356100 | 5.32379200  | -1.29277500 |
| C                         | -1.69497500 | 4.02131900  | 0.41227800  |
| H                         | -2.11237500 | 4.71099900  | 1.13768100  |
| C                         | -1.23830300 | 2.77584100  | 0.82523500  |
| H                         | -1.28850600 | 2.46048500  | 1.86078900  |
| C                         | -0.42177000 | -1.96122800 | -1.63443700 |
| C                         | -0.98336700 | -2.98851800 | -2.38003800 |
| H                         | -0.57705500 | -3.24191500 | -3.35420800 |
| C                         | -2.07481500 | -3.68669500 | -1.85383500 |
| H                         | -2.52915000 | -4.49468600 | -2.41908700 |
| C                         | -2.57605900 | -3.32284300 | -0.60574400 |
| H                         | -3.43010500 | -3.82863300 | -0.16886100 |
| C                         | -1.97178600 | -2.27786000 | 0.08728700  |

|   |             |             |             |  |
|---|-------------|-------------|-------------|--|
| H | -2.36292700 | -1.94341900 | 1.04444900  |  |
| C | 2.15498200  | 0.75642400  | -1.36567400 |  |
| H | 2.73660400  | 0.60173300  | -2.28225800 |  |
| C | -0.13019100 | 1.09235400  | -2.25557600 |  |
| H | 0.36815200  | 1.48883900  | -3.14834600 |  |
| H | -0.98144900 | 0.49281900  | -2.59824000 |  |
| C | 0.80027000  | -1.19200100 | -2.08527800 |  |
| H | 1.70517500  | -1.69409600 | -1.72383200 |  |
| H | 0.87019500  | -1.14608200 | -3.17846000 |  |
| N | 0.78242200  | 0.18469400  | -1.50001100 |  |
| O | -0.60393100 | -0.03836300 | 2.18010300  |  |
| O | -3.59658300 | -0.78639800 | 2.32720500  |  |
| C | -2.97605200 | -0.49875600 | 3.43775500  |  |
| H | -2.73110900 | -1.33848400 | 4.11489400  |  |
| H | -3.26407600 | 0.43403500  | 3.95456500  |  |
| H | -1.86314500 | -0.23900500 | 2.95160100  |  |
| H | 2.05125100  | 1.83897600  | -1.22607800 |  |
| H | 0.02746300  | 0.22721100  | 2.87493700  |  |
